# Supplementary material
Source: PubMed Central journal article supplement (PMC7275773)
Supplement: pnas.1915277117.sapp.pdf [file pnas.1915277117.sapp.pdf]

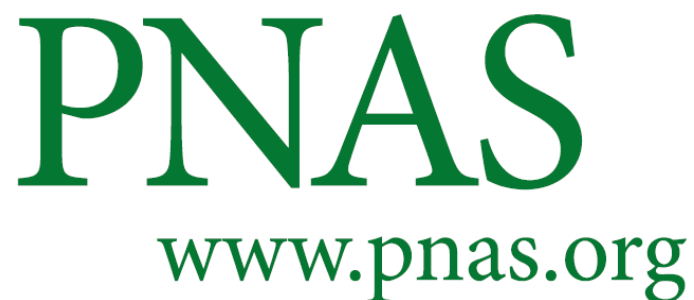

Supplementary Information for

**Evaluation of plant sources for anti-infective lead compound discovery by correlating phylogenetic, spatial, and bioactivity data**

**Laura Holzmeyer, Anne-Kathrin Hartig, Katrin Franke, Wolfgang Brandt, Alexandra N. Muellner-Riehl, Ludger A. Wessjohann, Jan Schnitzler**

Corresponding authors:

Jan Schnitzler

Email: [jan.schnitzler@uni-leipzig.de](mailto:jan.schnitzler@uni-leipzig.de)

Alexandra N. Muellner-Riehl

Email: [muellner-riehl@uni-leipzig.de](mailto:muellner-riehl@uni-leipzig.de)

Ludger A. Wessjohann

Email: [wessjohann@ipb-halle.de](mailto:wessjohann@ipb-halle.de)

**This PDF file includes:**

Figures S1 to S4

Tables S1 to S10

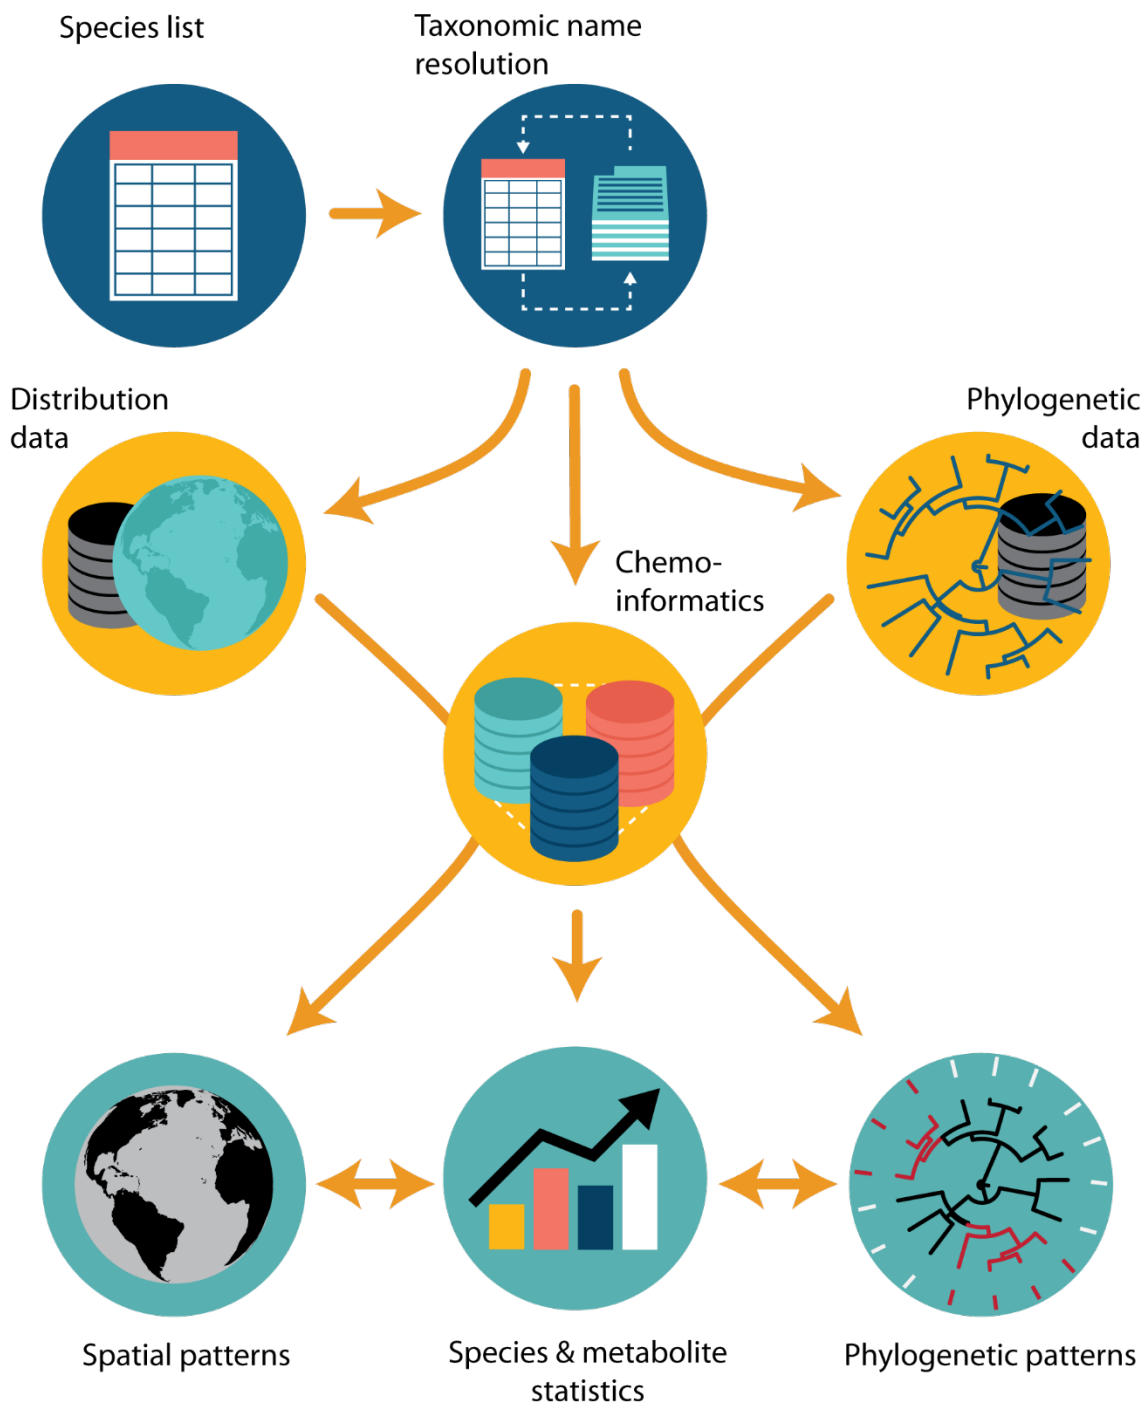

**Fig. S1. Overview of the data and analysis pipeline presented here.** Following taxonomic name resolution, the list of species is used to compile distribution data, phylogenetic tree(s), and information regarding the metabolites and their activities. These are then used to identify promising clades and geographic regions for drug discovery efforts.

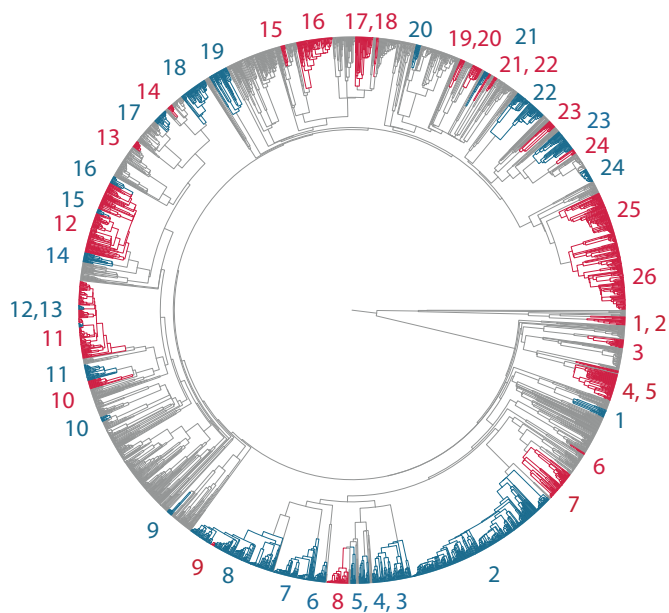

**Fig. S2. Phylogenetic patterns of anti-infective activities across the flora of Java: all seed plant species.** Overrepresentation ('hot clades', red) and underrepresentation ('cold clades', blue) were identified using the presence of known anti-infective activities for all seed plant species on Java. Numbers correspond to tables S4 (hot clades) and S5 ('cold clades'), respectively.

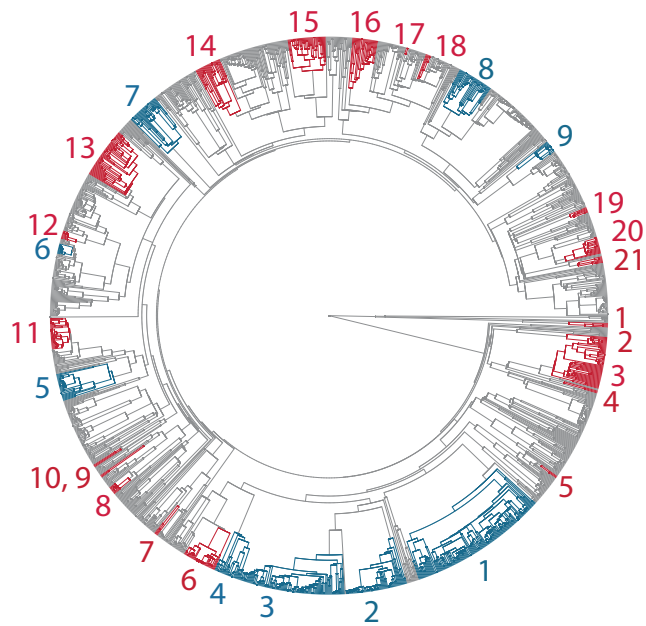

**Figure S3. Phylogenetic patterns of anti-infective activities across the flora of Java: native seed plant species only.** Overrepresentation ('hot clades', red) and underrepresentation ('cold clades', blue) were identified using the presence of known anti-infective activities for all seed plant species native to Java. Numbers correspond to tables S6 (hot clades) and S7 ('cold clades'), respectively.

(A) All plant species

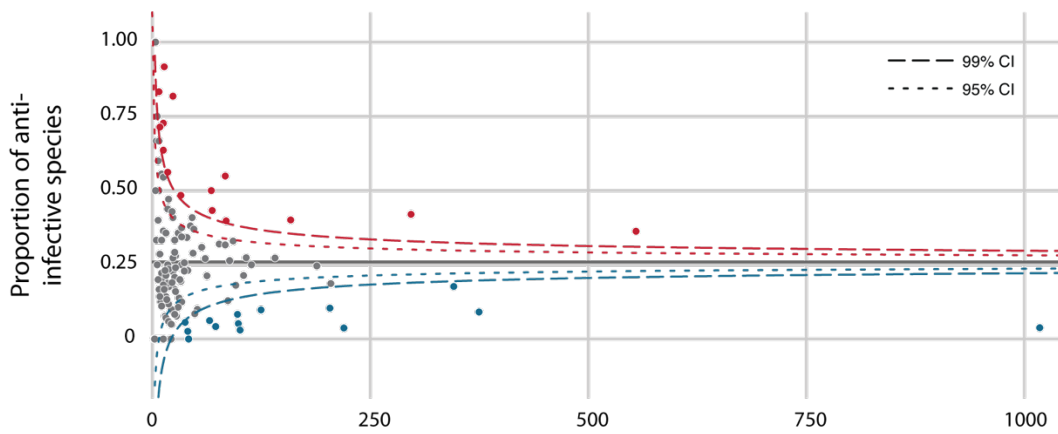

(B) Native plant species only

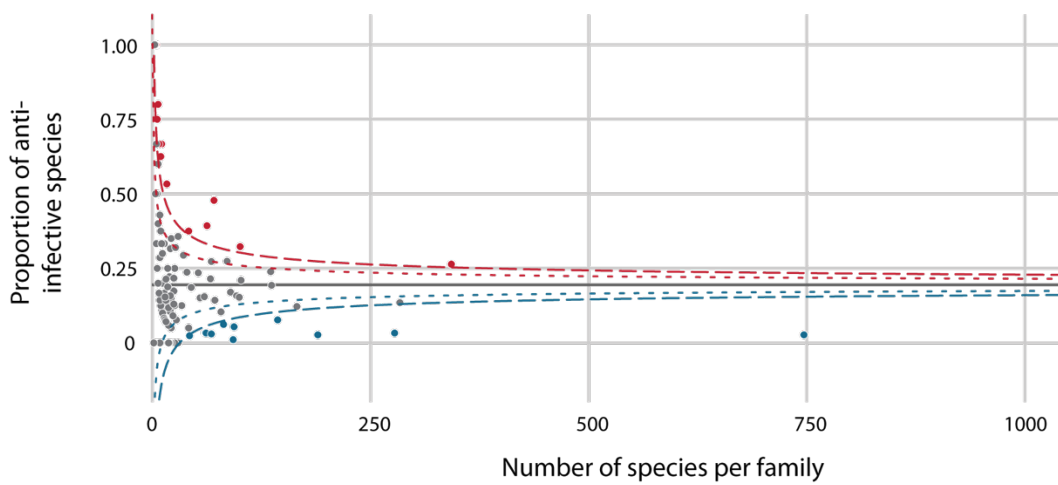

**Figure S4. Taxonomic analysis of anti-infective effects in seed plant species across the flora of Java.** For each plant family, we calculated the proportion of species with anti-infective effects (metabolites with known activity). The overall mean of all families was then used to calculate the 95% and 99% confidence intervals (CI) depending on the number of species per family for (A) all seed plant species recorded on Java, and (B) native seed plant species only, respectively.

**Table S1. Phylogenetic signal of all anti-infective activities (against vertebrate pathogens) across the flora of Java using the D-statistic.**

|                | all species | native species |
|----------------|-------------|----------------|
| anti-infective | 0.655*      | 0.691*         |
| antifungal     | 0.726*      | 0.785*         |
| antimicrobial  | 0.684*      | 0.727*         |
| antiviral      | 0.739*      | 0.766*         |
| antiparasitic  | 0.687*      | 0.721*         |

Note: Asterisk (\*) indicates significant deviation from both random and clumped patterns (see Material & Methods for more details).

**Table S2. Species and families within 'hot clades' of the analysis using all seed plant species, introduced and native.**

| <b>Clade</b> | <b>Species</b>                   | <b>Family</b> |   |                                      |            |
|--------------|----------------------------------|---------------|---|--------------------------------------|------------|
| 1            | <i>Dacrycarpus imbricatus</i>    | Podocarpaceae | 5 | <i>Alphonsea javanica</i>            | Annonaceae |
| 1            | <i>Dacrycarpus imbricatu</i>     | Podocarpaceae | 5 | <i>Annona glabra</i>                 | Annonaceae |
| 1            | <i>Nageia wallichiana</i>        | Podocarpaceae | 5 | <i>Annona muricata</i>               | Annonaceae |
| 1            | <i>Podocarpus nerifolius</i>     | Podocarpaceae | 5 | <i>Annona purpurea</i>               | Annonaceae |
| 1            | <i>Podocarpus polystachyus</i>   | Podocarpaceae | 5 | <i>Annona reticulata</i>             | Annonaceae |
| 1            | <i>Podocarpus rumphii</i>        | Podocarpaceae | 5 | <i>Annona squamosa</i>               | Annonaceae |
| 1            | <i>Sundacarpus amarus</i>        | Podocarpaceae | 5 | <i>Artabotrys hexapetalus</i>        | Annonaceae |
| 2            | <i>Callitris endlicheri</i>      | Cupressaceae  | 5 | <i>Artabotrys suaveolens</i>         | Annonaceae |
| 2            | <i>Chamaecyparis lawsoniana</i>  | Cupressaceae  | 5 | <i>Cananga odorata</i>               | Annonaceae |
| 2            | <i>Chamaecyparis obtusa</i>      | Cupressaceae  | 5 | <i>Cyathocalyx sumatranus</i>        | Annonaceae |
| 2            | <i>Chamaecyparis pisifera</i>    | Cupressaceae  | 5 | <i>Dasydaschalum blumei</i>          | Annonaceae |
| 2            | <i>Cryptomeria japonica</i>      | Cupressaceae  | 5 | <i>Dasydaschalum dasymaschalum</i>   | Annonaceae |
| 2            | <i>Cunninghamia lanceolata</i>   | Cupressaceae  | 5 | <i>Desmos chinensis</i>              | Annonaceae |
| 2            | <i>Cupressus sempervirens</i>    | Cupressaceae  | 5 | <i>Friesodielsia biglandulosa</i>    | Annonaceae |
| 2            | <i>Hesperocyparis lusitanica</i> | Cupressaceae  | 5 | <i>Friesodielsia cuneiformis</i>     | Annonaceae |
| 2            | <i>Juniperus chinensis</i>       | Cupressaceae  | 5 | <i>Goniothalamus costulatus</i>      | Annonaceae |
| 2            | <i>Juniperus osteosperma</i>     | Cupressaceae  | 5 | <i>Goniothalamus macrophyllus</i>    | Annonaceae |
| 2            | <i>Platycladus orientalis</i>    | Cupressaceae  | 5 | <i>Goniothalamus parallelovenius</i> | Annonaceae |
| 3            | <i>Peperomia arifolia</i>        | Piperaceae    | 5 | <i>Maasia glauca</i>                 | Annonaceae |
| 3            | <i>Peperomia metallica</i>       | Piperaceae    | 5 | <i>Marsypopetalum pallidum</i>       | Annonaceae |
| 3            | <i>Peperomia pellucida</i>       | Piperaceae    | 5 | <i>Meiogyne cylindrocarpa</i>        | Annonaceae |
| 3            | <i>Peperomia verschaaffeltii</i> | Piperaceae    | 5 | <i>Meiogyne virgata</i>              | Annonaceae |
| 3            | <i>Piper aduncum</i>             | Piperaceae    | 5 | <i>Melodorum fruticosum</i>          | Annonaceae |
| 3            | <i>Piper betle</i>               | Piperaceae    | 5 | <i>Mezzettia parviflora</i>          | Annonaceae |
| 3            | <i>Piper caninum</i>             | Piperaceae    | 5 | <i>Milium horsfieldii</i>            | Annonaceae |
| 3            | <i>Piper cubeba</i>              | Piperaceae    | 5 | <i>Milium longipes</i>               | Annonaceae |
| 3            | <i>Piper hispidum</i>            | Piperaceae    | 5 | <i>Mitrella kentii</i>               | Annonaceae |
| 3            | <i>Piper muricatum</i>           | Piperaceae    | 5 | <i>Mitrephora polypyrena</i>         | Annonaceae |
| 3            | <i>Piper nigrum</i>              | Piperaceae    | 5 | <i>Monodora angolensis</i>           | Annonaceae |
| 3            | <i>Piper peltatum</i>            | Piperaceae    | 5 | <i>Monodora myristica</i>            | Annonaceae |
| 3            | <i>Piper retrofractum</i>        | Piperaceae    | 5 | <i>Neo-uvaria parallelivenia</i>     | Annonaceae |
| 3            | <i>Piper sarmentosum</i>         | Piperaceae    | 5 | <i>Orophea creaghii</i>              | Annonaceae |
| 3            | <i>Piper umbellatum</i>          | Piperaceae    | 5 | <i>Orophea enneandra</i>             | Annonaceae |
| 3            | <i>Piper wallichii</i>           | Piperaceae    | 5 | <i>Platymitra macrocarpa</i>         | Annonaceae |
| 3            | <i>Zippelia begoniifolia</i>     | Piperaceae    | 5 | <i>Polyalthia longipes</i>           | Annonaceae |
| 4            | <i>Magnolia champaca</i>         | Magnoliaceae  | 5 | <i>Polyalthia subcordata</i>         | Annonaceae |
| 4            | <i>Magnolia figo</i>             | Magnoliaceae  | 5 | <i>Polyalthia suberosa</i>           | Annonaceae |
| 4            | <i>Magnolia montana</i>          | Magnoliaceae  | 5 | <i>Popowia pisocarpa</i>             | Annonaceae |
| 4            | <i>Magnolia sumatrana</i>        | Magnoliaceae  | 5 | <i>Pseuduvaria latifolia</i>         | Annonaceae |
| 4            | <i>Michelia alba</i>             | Magnoliaceae  | 5 | <i>Pseuduvaria reticulata</i>        | Annonaceae |
| 5            | <i>Alphonsea elliptica</i>       | Annonaceae    |   |                                      |            |

|   |                                |                |   |                                  |               |
|---|--------------------------------|----------------|---|----------------------------------|---------------|
| 5 | <i>Pseuduvaria rugosa</i>      | Annonaceae     | 7 | <i>Asparagus falcatus</i>        | Asparagaceae  |
| 5 | <i>Pyramidanthe prismatica</i> | Annonaceae     | 7 | <i>Asparagus officinalis</i>     | Asparagaceae  |
| 5 | <i>Rollinia mucosa</i>         | Annonaceae     | 7 | <i>Asparagus racemosus</i>       | Asparagaceae  |
| 5 | <i>Sphaerocoryne affinis</i>   | Annonaceae     | 7 | <i>Asparagus setaceus</i>        | Asparagaceae  |
| 5 | <i>Trivalvaria macrophylla</i> | Annonaceae     | 7 | <i>Asparagus virgatus</i>        | Asparagaceae  |
| 5 | <i>Uvaria argentea</i>         | Annonaceae     | 7 | <i>Aspidistra elatior</i>        | Asparagaceae  |
| 5 | <i>Uvaria chamae</i>           | Annonaceae     | 7 | <i>Beaucarnea recurvata</i>      | Asparagaceae  |
| 5 | <i>Uvaria concava</i>          | Annonaceae     | 7 | <i>Bowiea volubilis</i>          | Asparagaceae  |
| 5 | <i>Uvaria grandiflora</i>      | Annonaceae     | 7 | <i>Chlorophytum comosum</i>      | Asparagaceae  |
| 5 | <i>Uvaria hirsuta</i>          | Annonaceae     | 7 | <i>Chlorophytum laxum</i>        | Asparagaceae  |
| 5 | <i>Uvaria rufa</i>             | Annonaceae     | 7 | <i>Cordyline fruticosa</i>       | Asparagaceae  |
| 6 | <i>Pandanus boninensis</i>     | Pandanaceae    | 7 | <i>Dracaena angustifolia</i>     | Asparagaceae  |
| 6 | <i>Pandanus dubius</i>         | Pandanaceae    | 7 | <i>Dracaena fontanesiana</i>     | Asparagaceae  |
| 6 | <i>Pandanus odorifer</i>       | Pandanaceae    | 7 | <i>Drimiopsis botryoides</i>     | Asparagaceae  |
| 6 | <i>Pandanus tectorius</i>      | Pandanaceae    | 7 | <i>Eustrephus latifolius</i>     | Asparagaceae  |
| 7 | <i>Agapanthus africanus</i>    | Amaryllidaceae | 7 | <i>Lachenalia aloides</i>        | Asparagaceae  |
| 7 | <i>Allium ascalonicum</i>      | Amaryllidaceae | 7 | <i>Ophiopogon japonicus</i>      | Asparagaceae  |
| 7 | <i>Allium chinense</i>         | Amaryllidaceae | 7 | <i>Ornithogalum candicans</i>    | Asparagaceae  |
| 7 | <i>Allium fistulosum</i>       | Amaryllidaceae | 7 | <i>Peliosanthes teta</i>         | Asparagaceae  |
| 7 | <i>Allium ramosum</i>          | Amaryllidaceae | 7 | <i>Polianthes tuberosa</i>       | Asparagaceae  |
| 7 | <i>Amaryllis belladonna</i>    | Amaryllidaceae | 7 | <i>Sansevieria hyacinthoides</i> | Asparagaceae  |
| 7 | <i>Clivia miniata</i>          | Amaryllidaceae | 7 | <i>Sansevieria trifasciata</i>   | Asparagaceae  |
| 7 | <i>Crinum asiaticum</i>        | Amaryllidaceae | 7 | <i>Yucca aloifolia</i>           | Asparagaceae  |
| 7 | <i>Crinum moorei</i>           | Amaryllidaceae | 7 | <i>Yucca gloriosa</i>            | Asparagaceae  |
| 7 | <i>Cyrtanthus mackenii</i>     | Amaryllidaceae | 7 | <i>Ledebouria revoluta</i>       | Liliaceae     |
| 7 | <i>Eucharis amazonica</i>      | Amaryllidaceae | 8 | <i>Alpinia galanga</i>           | Zingiberaceae |
| 7 | <i>Habranthus tubispathus</i>  | Amaryllidaceae | 8 | <i>Alpinia malaccensis</i>       | Zingiberaceae |
| 7 | <i>Hippeastrum aulicum</i>     | Amaryllidaceae | 8 | <i>Alpinia mutica</i>            | Zingiberaceae |
| 7 | <i>Hippeastrum puniceum</i>    | Amaryllidaceae | 8 | <i>Alpinia scabra</i>            | Zingiberaceae |
| 7 | <i>Hippeastrum stylosum</i>    | Amaryllidaceae | 8 | <i>Amomum aculeatum</i>          | Zingiberaceae |
| 7 | <i>Hippeastrum vittatum</i>    | Amaryllidaceae | 8 | <i>Amomum compactum</i>          | Zingiberaceae |
| 7 | <i>Hymenocallis caribaea</i>   | Amaryllidaceae | 8 | <i>Amomum dealbatum</i>          | Zingiberaceae |
| 7 | <i>Hymenocallis littoralis</i> | Amaryllidaceae | 8 | <i>Amomum maximum</i>            | Zingiberaceae |
| 7 | <i>Leucojum aestivum</i>       | Amaryllidaceae | 8 | <i>Amomum villosum</i>           | Zingiberaceae |
| 7 | <i>Narcissus jonquilla</i>     | Amaryllidaceae | 8 | <i>Boesenbergia curtisii</i>     | Zingiberaceae |
| 7 | <i>Narcissus tazetta</i>       | Amaryllidaceae | 8 | <i>Boesenbergia rotunda</i>      | Zingiberaceae |
| 7 | <i>Nothoscordum gracile</i>    | Amaryllidaceae | 8 | <i>Curcuma aeruginosa</i>        | Zingiberaceae |
| 7 | <i>Pancratium maritimum</i>    | Amaryllidaceae | 8 | <i>Curcuma aurantiaca</i>        | Zingiberaceae |
| 7 | <i>Proiphys amboinensis</i>    | Amaryllidaceae | 8 | <i>Curcuma colorata</i>          | Zingiberaceae |
| 7 | <i>Scadoxus multiflorus</i>    | Amaryllidaceae | 8 | <i>Curcuma heyneana</i>          | Zingiberaceae |
| 7 | <i>Sprekelia formosissima</i>  | Amaryllidaceae | 8 | <i>Curcuma longa</i>             | Zingiberaceae |
| 7 | <i>Zephyranthes candida</i>    | Amaryllidaceae | 8 | <i>Curcuma mangga</i>            | Zingiberaceae |
| 7 | <i>Agave americana</i>         | Asparagaceae   | 8 | <i>Curcuma montana</i>           | Zingiberaceae |
| 7 | <i>Agave sisalana</i>          | Asparagaceae   | 8 | <i>Curcuma parviflora</i>        | Zingiberaceae |
| 7 | <i>Albuca canadensis</i>       | Asparagaceae   | 8 | <i>Curcuma parviflora</i>        | Zingiberaceae |
| 7 | <i>Asparagus aethiopicus</i>   | Asparagaceae   | 8 | <i>Curcuma phaeocaulis</i>       | Zingiberaceae |
| 7 | <i>Asparagus africanus</i>     | Asparagaceae   | 8 | <i>Curcuma purpurascens</i>      | Zingiberaceae |
| 7 | <i>Asparagus asparagoides</i>  | Asparagaceae   | 8 | <i>Curcuma xanthorrhiza</i>      | Zingiberaceae |



|    |                                  |                |    |                                     |            |
|----|----------------------------------|----------------|----|-------------------------------------|------------|
| 8  | <i>Curcuma zedoaria</i>          | Zingiberaceae  | 11 | <i>Achillea millefolium</i>         | Asteraceae |
| 8  | <i>Elettaria cardamomum</i>      | Zingiberaceae  | 11 | <i>Achillea ptarmica</i>            | Asteraceae |
| 8  | <i>Etlingera elatior</i>         | Zingiberaceae  | 11 | <i>Ageratina adenophora</i>         | Asteraceae |
| 8  | <i>Etlingera hemisphaerica</i>   | Zingiberaceae  | 11 | <i>Ageratina riparia</i>            | Asteraceae |
| 8  | <i>Globba marantina</i>          | Zingiberaceae  | 11 | <i>Ageratum conyzoides</i>          | Asteraceae |
| 8  | <i>Hedychium coronarium</i>      | Zingiberaceae  | 11 | <i>Ageratum houstonianum</i>        | Asteraceae |
| 8  | <i>Hedychium flavescens</i>      | Zingiberaceae  | 11 | <i>Ambrosia artemisiifolia</i>      | Asteraceae |
| 8  | <i>Hedychium horsfieldii</i>     | Zingiberaceae  | 11 | <i>Arctotis stoechadifolia</i>      | Asteraceae |
| 8  | <i>Hedychium spicatum</i>        | Zingiberaceae  | 11 | <i>Argyranthemum frutescens</i>     | Asteraceae |
| 8  | <i>Hornstedtia conica</i>        | Zingiberaceae  | 11 | <i>Artemisia annua</i>              | Asteraceae |
| 8  | <i>Hornstedtia leonurus</i>      | Zingiberaceae  | 11 | <i>Artemisia dracuncululus</i>      | Asteraceae |
| 8  | <i>Hornstedtia minor</i>         | Zingiberaceae  | 11 | <i>Artemisia lactiflora</i>         | Asteraceae |
| 8  | <i>Kaempferia angustifolia</i>   | Zingiberaceae  | 11 | <i>Artemisia scoparia</i>           | Asteraceae |
| 8  | <i>Kaempferia galanga</i>        | Zingiberaceae  | 11 | <i>Artemisia vulgaris</i>           | Asteraceae |
| 8  | <i>Kaempferia rotunda</i>        | Zingiberaceae  | 11 | <i>Athroisma laciniatum</i>         | Asteraceae |
| 8  | <i>Zingiber gramineum</i>        | Zingiberaceae  | 11 | <i>Austroeupatorium inulifolium</i> | Asteraceae |
| 8  | <i>Zingiber montanum</i>         | Zingiberaceae  | 11 | <i>Baltimora recta</i>              | Asteraceae |
| 8  | <i>Zingiber odoriferum</i>       | Zingiberaceae  | 11 | <i>Bidens basalis</i>               | Asteraceae |
| 8  | <i>Zingiber officinale</i>       | Zingiberaceae  | 11 | <i>Bidens biternata</i>             | Asteraceae |
| 8  | <i>Zingiber zerumbet</i>         | Zingiberaceae  | 11 | <i>Bidens pilosa</i>                | Asteraceae |
| 9  | <i>Bothriochloa bladhii</i>      | Poaceae        | 11 | <i>Bidens sweetiana</i>             | Asteraceae |
| 9  | <i>Capillipedium assimile</i>    | Poaceae        | 11 | <i>Bidens tinctoria</i>             | Asteraceae |
| 9  | <i>Capillipedium parviflorum</i> | Poaceae        | 11 | <i>Bidens tripartita</i>            | Asteraceae |
| 9  | <i>Cymbopogon citratus</i>       | Poaceae        | 11 | <i>Blumea balsamifera</i>           | Asteraceae |
| 9  | <i>Cymbopogon flexuosus</i>      | Poaceae        | 11 | <i>Blumea crispata</i>              | Asteraceae |
| 9  | <i>Cymbopogon nardus</i>         | Poaceae        | 11 | <i>Blumea dregeanoides</i>          | Asteraceae |
| 9  | <i>Cymbopogon winterianus</i>    | Poaceae        | 11 | <i>Blumea lacera</i>                | Asteraceae |
| 9  | <i>Dichanthium aristatum</i>     | Poaceae        | 11 | <i>Blumea lanceolaria</i>           | Asteraceae |
| 10 | <i>Anthriscus cerefolium</i>     | Apiaceae       | 11 | <i>Blumea riparia</i>               | Asteraceae |
| 10 | <i>Apium prostratum</i>          | Apiaceae       | 11 | <i>Blumea saxatilis</i>             | Asteraceae |
| 10 | <i>Carum carvi</i>               | Apiaceae       | 11 | <i>Blumea sessiliflora</i>          | Asteraceae |
| 10 | <i>Coriandrum sativum</i>        | Apiaceae       | 11 | <i>Blumea tenella</i>               | Asteraceae |
| 10 | <i>Cryptotaenia canadensis</i>   | Apiaceae       | 11 | <i>Boltonia asteroides</i>          | Asteraceae |
| 10 | <i>Cuminum cyminum</i>           | Apiaceae       | 11 | <i>Buphthalmum salicifolium</i>     | Asteraceae |
| 10 | <i>Cyclospermum leptophyllum</i> | Apiaceae       | 11 | <i>Calendula officinalis</i>        | Asteraceae |
| 10 | <i>Daucus carota</i>             | Apiaceae       | 11 | <i>Calyptocarpus vialis</i>         | Asteraceae |
| 10 | <i>Eryngium foetidum</i>         | Apiaceae       | 11 | <i>Carpesium cernuum</i>            | Asteraceae |
| 10 | <i>Foeniculum vulgare</i>        | Apiaceae       | 11 | <i>Carthamus tinctorius</i>         | Asteraceae |
| 10 | <i>Oenanthe javanica</i>         | Apiaceae       | 11 | <i>Catananche caerulea</i>          | Asteraceae |
| 10 | <i>Pastinaca sativa</i>          | Apiaceae       | 11 | <i>Centaurea cyanus</i>             | Asteraceae |
| 10 | <i>Petroselinum crispum</i>      | Apiaceae       | 11 | <i>Centaurea melitensis</i>         | Asteraceae |
| 10 | <i>Sanicula elata</i>            | Apiaceae       | 11 | <i>Centipeda minima</i>             | Asteraceae |
| 10 | <i>Torilis japonica</i>          | Apiaceae       | 11 | <i>Chromolaena odorata</i>          | Asteraceae |
| 10 | <i>Trachyspermum ammi</i>        | Apiaceae       | 11 | <i>Chrysanthemum indicum</i>        | Asteraceae |
| 10 | <i>Delarbrea paradoxa</i>        | Myodocarpaceae | 11 | <i>Cichorium endivia</i>            | Asteraceae |
| 11 | <i>Achillea alpina</i>           | Asteraceae     | 11 | <i>Cichorium intybus</i>            | Asteraceae |
|    |                                  |                | 11 | <i>Cosmos bipinnatus</i>            | Asteraceae |

|    |                                    |            |    |                                   |              |
|----|------------------------------------|------------|----|-----------------------------------|--------------|
| 11 | <i>Cosmos sulphureus</i>           | Asteraceae | 11 | <i>Scaevola taccada</i>           | Goodeniaceae |
| 11 | <i>Crassocephalum crepidioides</i> | Asteraceae | 11 | <i>Scorzonera hispanica</i>       | Asteraceae   |
| 11 | <i>Crossostephium chinense</i>     | Asteraceae | 11 | <i>Senecio elegans</i>            | Asteraceae   |
| 11 | <i>Cyanthillium cinereum</i>       | Asteraceae | 11 | <i>Senecio quadridentatus</i>     | Asteraceae   |
| 11 | <i>Cyanus montanus</i>             | Asteraceae | 11 | <i>Senecio vulgaris</i>           | Asteraceae   |
| 11 | <i>Cynara cardunculus</i>          | Asteraceae | 11 | <i>Sigesbeckia orientalis</i>     | Asteraceae   |
| 11 | <i>Dahlia pinnata</i>              | Asteraceae | 11 | <i>Silybum marianum</i>           | Asteraceae   |
| 11 | <i>Dichrocephala integrifolia</i>  | Asteraceae | 11 | <i>Solidago canadensis</i>        | Asteraceae   |
| 11 | <i>Duhaldea cappa</i>              | Asteraceae | 11 | <i>Solidago gigantea</i>          | Asteraceae   |
| 11 | <i>Echinacea purpurea</i>          | Asteraceae | 11 | <i>Solidago nemoralis</i>         | Asteraceae   |
| 11 | <i>Eclipta prostrata</i>           | Asteraceae | 11 | <i>Soliva anthemifolia</i>        | Asteraceae   |
| 11 | <i>Emilia coccinea</i>             | Asteraceae | 11 | <i>Sonchus asper</i>              | Asteraceae   |
| 11 | <i>Emilia prenanthoidea</i>        | Asteraceae | 11 | <i>Sonchus oleraceus</i>          | Asteraceae   |
| 11 | <i>Emilia sonchifolia</i>          | Asteraceae | 11 | <i>Sphaeranthus africanus</i>     | Asteraceae   |
| 11 | <i>Erechtites hieraciifolius</i>   | Asteraceae | 11 | <i>Sphaeranthus indicus</i>       | Asteraceae   |
| 11 | <i>Erigeron karvinskianus</i>      | Asteraceae | 11 | <i>Sphagneticola calendulacea</i> | Asteraceae   |
| 11 | <i>Erigeron speciosus</i>          | Asteraceae | 11 | <i>Stevia ovata</i>               | Asteraceae   |
| 11 | <i>Ethulia conyzoides</i>          | Asteraceae | 11 | <i>Stiffia chrysantha</i>         | Asteraceae   |
| 11 | <i>Gaillardia pulchella</i>        | Asteraceae | 11 | <i>Stokesia laevis</i>            | Asteraceae   |
| 11 | <i>Galinsoga parviflora</i>        | Asteraceae | 11 | <i>Strobocalyx arborea</i>        | Asteraceae   |
| 11 | <i>Glebionis coronaria</i>         | Asteraceae | 11 | <i>Symphotrichum cordifolium</i>  | Asteraceae   |
| 11 | <i>Glebionis segetum</i>           | Asteraceae | 11 | <i>Symphotrichum ericoides</i>    | Asteraceae   |
| 11 | <i>Gnaphalium polycaulon</i>       | Asteraceae | 11 | <i>Symphotrichum novibelgii</i>   | Asteraceae   |
| 11 | <i>Grangea maderaspatana</i>       | Asteraceae | 11 | <i>Synedrella nodiflora</i>       | Asteraceae   |
| 11 | <i>Gynura procumbens</i>           | Asteraceae | 11 | <i>Tagetes erecta</i>             | Asteraceae   |
| 11 | <i>Helenium amarum</i>             | Asteraceae | 11 | <i>Tagetes patula</i>             | Asteraceae   |
| 11 | <i>Helianthus angustifolius</i>    | Asteraceae | 11 | <i>Tanacetum cinerariifolium</i>  | Asteraceae   |
| 11 | <i>Helianthus annuus</i>           | Asteraceae | 11 | <i>Tanacetum coccineum</i>        | Asteraceae   |
| 11 | <i>Helianthus argophyllus</i>      | Asteraceae | 11 | <i>Tanacetum parthenium</i>       | Asteraceae   |
| 11 | <i>Helianthus tuberosus</i>        | Asteraceae | 11 | <i>Taraxacum officinale</i>       | Asteraceae   |
| 11 | <i>Ixeridium laevigatum</i>        | Asteraceae | 11 | <i>Tithonia diversifolia</i>      | Asteraceae   |
| 11 | <i>Jacobaea maritima</i>           | Asteraceae | 11 | <i>Tithonia rotundifolia</i>      | Asteraceae   |
| 11 | <i>Lactuca indica</i>              | Asteraceae | 11 | <i>Tridax procumbens</i>          | Asteraceae   |
| 11 | <i>Lactuca sativa</i>              | Asteraceae | 11 | <i>Ursinia anthemoides</i>        | Asteraceae   |
| 11 | <i>Launaea sarmentosa</i>          | Asteraceae | 11 | <i>Vernonia patula</i>            | Asteraceae   |
| 11 | <i>Melampodium divaricatum</i>     | Asteraceae | 11 | <i>Wedelia asperrima</i>          | Asteraceae   |
| 11 | <i>Melampodium perfoliatum</i>     | Asteraceae | 11 | <i>Wedelia chinensis</i>          | Asteraceae   |
| 11 | <i>Mikania cordata</i>             | Asteraceae | 11 | <i>Wollastonia biflora</i>        | Asteraceae   |
| 11 | <i>Pluchea indica</i>              | Asteraceae | 11 | <i>Xanthium strumarium</i>        | Asteraceae   |
| 11 | <i>Porophyllum ruderale</i>        | Asteraceae | 11 | <i>Youngia japonica</i>           | Asteraceae   |
| 11 | <i>Pseudelephantopus spicatus</i>  | Asteraceae | 12 | <i>Acanthus ebracteatus</i>       | Acanthaceae  |
| 11 | <i>Pterocaulon sphacelatum</i>     | Asteraceae | 12 | <i>Acanthus ilicifolius</i>       | Acanthaceae  |
| 11 | <i>Rolandra fruticosa</i>          | Asteraceae | 12 | <i>Andrographis paniculata</i>    | Acanthaceae  |
| 11 | <i>Roldana petasitis</i>           | Asteraceae | 12 | <i>Aphelandra arborea</i>         | Acanthaceae  |
|    |                                    |            | 12 | <i>Aphelandra maculata</i>        | Acanthaceae  |

|    |                                     |              |    |                                    |           |
|----|-------------------------------------|--------------|----|------------------------------------|-----------|
| 12 | <i>Asystasia gangetica</i>          | Acanthaceae  | 12 | <i>Clerodendrum speciosissimum</i> | Lamiaceae |
| 12 | <i>Avicennia marina</i>             | Acanthaceae  | 12 | <i>Clerodendrum splendens</i>      | Lamiaceae |
| 12 | <i>Barleria lupulina</i>            | Acanthaceae  | 12 | <i>Clerodendrum thomsoniae</i>     | Lamiaceae |
| 12 | <i>Barleria prionitis</i>           | Acanthaceae  | 12 | <i>Clerodendrum villosum</i>       | Lamiaceae |
| 12 | <i>Clinacanthus nutans</i>          | Acanthaceae  | 12 | <i>Clinopodium gracile</i>         | Lamiaceae |
| 12 | <i>Crossandra infundibuliformis</i> | Acanthaceae  | 12 | <i>Cymaria dichotoma</i>           | Lamiaceae |
| 12 | <i>Fittonia albivenis</i>           | Acanthaceae  | 12 | <i>Hyptis brevipes</i>             | Lamiaceae |
| 12 | <i>Gymnostachyum ceylanicum</i>     | Acanthaceae  | 12 | <i>Hyptis capitata</i>             | Lamiaceae |
| 12 | <i>Justicia adhatoda</i>            | Acanthaceae  | 12 | <i>Hyptis pectinata</i>            | Lamiaceae |
| 12 | <i>Justicia betonica</i>            | Acanthaceae  | 12 | <i>Hyssopus officinalis</i>        | Lamiaceae |
| 12 | <i>Justicia gendarussa</i>          | Acanthaceae  | 12 | <i>Isodon coetsa</i>               | Lamiaceae |
| 12 | <i>Justicia procumbens</i>          | Acanthaceae  | 12 | <i>Lavandula angustifolia</i>      | Lamiaceae |
| 12 | <i>Justicia quadrifaria</i>         | Acanthaceae  | 12 | <i>Leonotis leonurus</i>           | Lamiaceae |
| 12 | <i>Pachystachys coccinea</i>        | Acanthaceae  | 12 | <i>Leonurus sibiricus</i>          | Lamiaceae |
| 12 | <i>Peristrophe hyssopifolia</i>     | Acanthaceae  | 12 | <i>Marsypianthes chamaedrys</i>    | Lamiaceae |
| 12 | <i>Rhinacanthus nasutus</i>         | Acanthaceae  | 12 | <i>Melissa axillaris</i>           | Lamiaceae |
| 12 | <i>Thunbergia alata</i>             | Acanthaceae  | 12 | <i>Melissa officinalis</i>         | Lamiaceae |
| 12 | <i>Thunbergia coccinea</i>          | Acanthaceae  | 12 | <i>Mentha canadensis</i>           | Lamiaceae |
| 12 | <i>Thunbergia erecta</i>            | Acanthaceae  | 12 | <i>Mentha pulegium</i>             | Lamiaceae |
| 12 | <i>Thunbergia grandiflora</i>       | Acanthaceae  | 12 | <i>Mentha spicata</i>              | Lamiaceae |
| 12 | <i>Thunbergia laurifolia</i>        | Acanthaceae  | 12 | <i>Mesosphaerum suaveolens</i>     | Lamiaceae |
| 12 | <i>Crescentia alata</i>             | Bignoniaceae | 12 | <i>Nepeta cataria</i>              | Lamiaceae |
| 12 | <i>Dolichandrone spathacea</i>      | Bignoniaceae | 12 | <i>Ocimum basilicum</i>            | Lamiaceae |
| 12 | <i>Handroanthus capitatus</i>       | Bignoniaceae | 12 | <i>Ocimum tenuiflorum</i>          | Lamiaceae |
| 12 | <i>Kigelia africana</i>             | Bignoniaceae | 12 | <i>Origanum majorana</i>           | Lamiaceae |
| 12 | <i>Millingtonia hortensis</i>       | Bignoniaceae | 12 | <i>Orthosiphon aristatus</i>       | Lamiaceae |
| 12 | <i>Oroxylum indicum</i>             | Bignoniaceae | 12 | <i>Paraphlomis javanica</i>        | Lamiaceae |
| 12 | <i>Parmentiera cereifera</i>        | Bignoniaceae | 12 | <i>Platostoma hispidum</i>         | Lamiaceae |
| 12 | <i>Pyrostegia venusta</i>           | Bignoniaceae | 12 | <i>Plectranthus amboinicus</i>     | Lamiaceae |
| 12 | <i>Tecoma capensis</i>              | Bignoniaceae | 12 | <i>Pogostemon auricularius</i>     | Lamiaceae |
| 12 | <i>Tecoma stans</i>                 | Bignoniaceae | 12 | <i>Pogostemon cablin</i>           | Lamiaceae |
| 12 | <i>Anisomeles indica</i>            | Lamiaceae    | 12 | <i>Pogostemon heyneanus</i>        | Lamiaceae |
| 12 | <i>Basilicum polystachyon</i>       | Lamiaceae    | 12 | <i>Premna odorata</i>              | Lamiaceae |
| 12 | <i>Callicarpa japonica</i>          | Lamiaceae    | 12 | <i>Premna serratifolia</i>         | Lamiaceae |
| 12 | <i>Callicarpa lancifolia</i>        | Lamiaceae    | 12 | <i>Rosmarinus officinalis</i>      | Lamiaceae |
| 12 | <i>Callicarpa pedunculata</i>       | Lamiaceae    | 12 | <i>Salvia chinensis</i>            | Lamiaceae |
| 12 | <i>Callicarpa rubella</i>           | Lamiaceae    | 12 | <i>Salvia officinalis</i>          | Lamiaceae |
| 12 | <i>Cedronella canariensis</i>       | Lamiaceae    | 12 | <i>Salvia viridis</i>              | Lamiaceae |
| 12 | <i>Clerodendrum buchananii</i>      | Lamiaceae    | 12 | <i>Satureja hortensis</i>          | Lamiaceae |
| 12 | <i>Clerodendrum indicum</i>         | Lamiaceae    | 12 | <i>Tectona grandis</i>             | Lamiaceae |
| 12 | <i>Clerodendrum japonicum</i>       | Lamiaceae    | 12 | <i>Thymus vulgaris</i>             | Lamiaceae |
| 12 | <i>Clerodendrum minahassae</i>      | Lamiaceae    | 12 | <i>Vitex agnus-castus</i>          | Lamiaceae |
| 12 | <i>Clerodendrum paniculatum</i>     | Lamiaceae    | 12 | <i>Vitex negundo</i>               | Lamiaceae |
|    |                                     |              | 12 | <i>Vitex quinata</i>               | Lamiaceae |
|    |                                     |              | 12 | <i>Vitex trifolia</i>              | Lamiaceae |

|    |                                |                  |    |                               |              |
|----|--------------------------------|------------------|----|-------------------------------|--------------|
| 12 | <i>Utricularia aurea</i>       | Lentibulariaceae | 13 | <i>Solanum melongena</i>      | Solanaceae   |
| 12 | <i>Utricularia caerulea</i>    | Lentibulariaceae | 13 | <i>Solanum</i>                | Solanaceae   |
| 12 | <i>Utricularia foveolata</i>   | Lentibulariaceae |    | <i>pseudocapsicum</i>         |              |
| 12 | <i>Utricularia gibba</i>       | Lentibulariaceae | 13 | <i>Solanum</i>                | Solanaceae   |
| 12 | <i>Utricularia striatula</i>   | Lentibulariaceae |    | <i>sisymbriifolium</i>        |              |
| 12 | <i>Utricularia uliginosa</i>   | Lentibulariaceae | 13 | <i>Solanum torvum</i>         | Solanaceae   |
| 12 | <i>Martynia annua</i>          | Martyniaceae     | 13 | <i>Solanum trilobatum</i>     | Solanaceae   |
| 12 | <i>Mazus pumilus</i>           | Mazaceae         | 13 | <i>Solanum virginianum</i>    | Solanaceae   |
| 12 | <i>Micrargeria filiformis</i>  | Orobanchaceae    | 13 | <i>Solanum wendlandii</i>     | Solanaceae   |
| 12 | <i>Striga asiatica</i>         | Orobanchaceae    | 13 | <i>Solanum wrightii</i>       | Solanaceae   |
| 12 | <i>Sesamum indicum</i>         | Pedaliaceae      | 14 | <i>Adina orientalis</i>       | Rubiaceae    |
| 12 | <i>Antirrhinum majus</i>       | Plantaginaceae   | 14 | <i>Breonia chinensis</i>      | Rubiaceae    |
| 12 | <i>Bacopa monnieri</i>         | Plantaginaceae   | 14 | <i>Cinchona calisaya</i>      | Rubiaceae    |
| 12 | <i>Collinsia heterophylla</i>  | Plantaginaceae   | 14 | <i>Cinchona officinalis</i>   | Rubiaceae    |
| 12 | <i>Cymbalaria muralis</i>      | Plantaginaceae   | 14 | <i>Cinchona pubescens</i>     | Rubiaceae    |
| 12 | <i>Digitalis purpurea</i>      | Plantaginaceae   | 14 | <i>Hymenodictyon</i>          | Rubiaceae    |
| 12 | <i>Dopatrium junceum</i>       | Plantaginaceae   |    | <i>orixense</i>               |              |
| 12 | <i>Limnophila aromatica</i>    | Plantaginaceae   | 14 | <i>Metadina trichotoma</i>    | Rubiaceae    |
| 12 | <i>Penstemon</i>               | Plantaginaceae   | 14 | <i>Mitragyna diversifolia</i> | Rubiaceae    |
|    | <i>campanulatus</i>            |                  | 14 | <i>Nauclea subdita</i>        | Rubiaceae    |
| 12 | <i>Penstemon hartwegii</i>     | Plantaginaceae   | 14 | <i>Neolamarckia</i>           | Rubiaceae    |
| 12 | <i>Plantago lanceolata</i>     | Plantaginaceae   |    | <i>cadamba</i>                |              |
| 12 | <i>Plantago major</i>          | Plantaginaceae   | 14 | <i>Uncaria lanosa</i>         | Rubiaceae    |
| 12 | <i>Russelia equisetiformis</i> | Plantaginaceae   | 15 | <i>Brassica napus</i>         | Brassicaceae |
| 12 | <i>Scoparia dulcis</i>         | Plantaginaceae   | 15 | <i>Brassica oleracea</i>      | Brassicaceae |
| 12 | <i>Veronica javanica</i>       | Plantaginaceae   | 15 | <i>Brassica rapa</i>          | Brassicaceae |
| 12 | <i>Veronica longifolia</i>     | Plantaginaceae   | 15 | <i>Iberis amara</i>           | Brassicaceae |
| 12 | <i>Bontia daphnoides</i>       | Scrophulariaceae | 15 | <i>Iberis umbellata</i>       | Brassicaceae |
| 12 | <i>Buddleja asiatica</i>       | Scrophulariaceae | 15 | <i>Matthiola incana</i>       | Brassicaceae |
| 12 | <i>Buddleja davidii</i>        | Scrophulariaceae | 15 | <i>Raphanus</i>               | Brassicaceae |
| 12 | <i>Buddleja lindleyana</i>     | Scrophulariaceae |    | <i>raphanistrum</i>           |              |
| 12 | <i>Duranta erecta</i>          | Verbenaceae      | 15 | <i>Raphanus sativus</i>       | Brassicaceae |
| 12 | <i>Lantana camara</i>          | Verbenaceae      | 15 | <i>Sinapis alba</i>           | Brassicaceae |
| 12 | <i>Lantana trifolia</i>        | Verbenaceae      | 16 | <i>Abelmoschus crinitus</i>   | Malvaceae    |
| 12 | <i>Petrea volubilis</i>        | Verbenaceae      | 16 | <i>Abelmoschus</i>            | Malvaceae    |
| 12 | <i>Phyla nodiflora</i>         | Verbenaceae      |    | <i>esculentus</i>             |              |
| 12 | <i>Stachytarpheta</i>          | Verbenaceae      | 16 | <i>Abelmoschus ficulneus</i>  | Malvaceae    |
|    | <i>cayennensis</i>             |                  | 16 | <i>Abelmoschus manihot</i>    | Malvaceae    |
| 12 | <i>Stachytarpheta</i>          | Verbenaceae      | 16 | <i>Abelmoschus</i>            | Malvaceae    |
|    | <i>jamaicensis</i>             |                  |    | <i>moschatus</i>              |              |
| 12 | <i>Stachytarpheta</i>          | Verbenaceae      | 16 | <i>Abutilon grandifolium</i>  | Malvaceae    |
|    | <i>mutabilis</i>               |                  | 16 | <i>Abutilon indicum</i>       | Malvaceae    |
| 12 | <i>Verbena bonariensis</i>     | Verbenaceae      | 16 | <i>Abutilon pannosum</i>      | Malvaceae    |
| 12 | <i>Verbena officinalis</i>     | Verbenaceae      | 16 | <i>Abutilon theophrasti</i>   | Malvaceae    |
| 12 | <i>Verbena rigida</i>          | Verbenaceae      | 16 | <i>Adansonia digitata</i>     | Malvaceae    |
| 13 | <i>Solanum</i>                 | Solanaceae       | 16 | <i>Alcea rosea</i>            | Malvaceae    |
|    | <i>aculeatissimum</i>          |                  | 16 | <i>Berrya javanica</i>        | Malvaceae    |
| 13 | <i>Solanum jamaicense</i>      | Solanaceae       | 16 | <i>Bombax ceiba</i>           | Malvaceae    |
| 13 | <i>Solanum lasiocarpum</i>     | Solanaceae       | 16 | <i>Brachychiton</i>           | Malvaceae    |
| 13 | <i>Solanum macrocarpon</i>     | Solanaceae       |    | <i>acerifolius</i>            |              |
| 13 | <i>Solanum mammosum</i>        | Solanaceae       | 16 | <i>Ceiba pentandra</i>        | Malvaceae    |
| 13 | <i>Solanum mauritianum</i>     | Solanaceae       | 16 | <i>Cola acuminata</i>         | Malvaceae    |
|    |                                |                  | 16 | <i>Commersonia</i>            | Malvaceae    |
|    |                                |                  |    | <i>bartramia</i>              |              |

|    |                                   |           |    |                                   |                |
|----|-----------------------------------|-----------|----|-----------------------------------|----------------|
| 16 | <i>Corchorus aestuans</i>         | Malvaceae | 16 | <i>Thespesia populnea</i>         | Malvaceae      |
| 16 | <i>Corchorus capsularis</i>       | Malvaceae | 16 | <i>Triumfetta rhomboidea</i>      | Malvaceae      |
| 16 | <i>Corchorus olitorius</i>        | Malvaceae | 16 | <i>Urena lobata</i>               | Malvaceae      |
| 16 | <i>Corchorus trilocularis</i>     | Malvaceae | 16 | <i>Muntingia calabura</i>         | Muntingiaceae  |
| 16 | <i>Durio zibethinus</i>           | Malvaceae | 17 | <i>Acronychia pedunculata</i>     | Rutaceae       |
| 16 | <i>Gossypium arboreum</i>         | Malvaceae | 17 | <i>Aegle marmelos</i>             | Rutaceae       |
| 16 | <i>Gossypium barbadense</i>       | Malvaceae | 17 | <i>Boenninghausenia albiflora</i> | Rutaceae       |
| 16 | <i>Gossypium herbaceum</i>        | Malvaceae | 17 | <i>Citrus amblycarpa</i>          | Rutaceae       |
| 16 | <i>Gossypium hirsutum</i>         | Malvaceae | 17 | <i>Citrus hystrix</i>             | Rutaceae       |
| 16 | <i>Guazuma ulmifolia</i>          | Malvaceae | 17 | <i>Citrus limon</i>               | Rutaceae       |
| 16 | <i>Helicteres angustifolia</i>    | Malvaceae | 17 | <i>Citrus maxima</i>              | Rutaceae       |
| 16 | <i>Heritiera littoralis</i>       | Malvaceae | 17 | <i>Citrus nobilis</i>             | Rutaceae       |
| 16 | <i>Hibiscus acetosella</i>        | Malvaceae | 17 | <i>Citrus reticulata</i>          | Rutaceae       |
| 16 | <i>Hibiscus cannabinus</i>        | Malvaceae | 17 | <i>Clausena excavata</i>          | Rutaceae       |
| 16 | <i>Hibiscus mutabilis</i>         | Malvaceae | 17 | <i>Clausena harmandiana</i>       | Rutaceae       |
| 16 | <i>Hibiscus radiatus</i>          | Malvaceae | 17 | <i>Clausena lansium</i>           | Rutaceae       |
| 16 | <i>Hibiscus rosa-sinensis</i>     | Malvaceae | 17 | <i>Erythrochiton brasiliensis</i> | Rutaceae       |
| 16 | <i>Hibiscus sabdariffa</i>        | Malvaceae | 17 | <i>Glycosmis cochinchinensis</i>  | Rutaceae       |
| 16 | <i>Hibiscus surattensis</i>       | Malvaceae | 17 | <i>Glycosmis parviflora</i>       | Rutaceae       |
| 16 | <i>Hibiscus syriacus</i>          | Malvaceae | 17 | <i>Harrisonia brownii</i>         | Rutaceae       |
| 16 | <i>Hibiscus vitifolius</i>        | Malvaceae | 17 | <i>Harrisonia perforata</i>       | Rutaceae       |
| 16 | <i>Kleinhovia hospita</i>         | Malvaceae | 17 | <i>Limonia acidissima</i>         | Rutaceae       |
| 16 | <i>Malope trifida</i>             | Malvaceae | 17 | <i>Lunasia amara</i>              | Rutaceae       |
| 16 | <i>Malva parviflora</i>           | Malvaceae | 17 | <i>Melicope denhamii</i>          | Rutaceae       |
| 16 | <i>Malva sylvestris</i>           | Malvaceae | 17 | <i>Melicope latifolia</i>         | Rutaceae       |
| 16 | <i>Malvastrum coromandelianum</i> | Malvaceae | 17 | <i>Melicope lunu-ankenda</i>      | Rutaceae       |
| 16 | <i>Malvaviscus arboreus</i>       | Malvaceae | 17 | <i>Merope angulata</i>            | Rutaceae       |
| 16 | <i>Melochia corchorifolia</i>     | Malvaceae | 17 | <i>Micromelum minutum</i>         | Rutaceae       |
| 16 | <i>Microcos paniculata</i>        | Malvaceae | 17 | <i>Murraya koenigii</i>           | Rutaceae       |
| 16 | <i>Modiola caroliniana</i>        | Malvaceae | 17 | <i>Murraya paniculata</i>         | Rutaceae       |
| 16 | <i>Ochroma pyramidale</i>         | Malvaceae | 17 | <i>Paramignya trimera</i>         | Rutaceae       |
| 16 | <i>Pentace polyantha</i>          | Malvaceae | 17 | <i>Perryodendron parviflorum</i>  | Rutaceae       |
| 16 | <i>Pseudobombax grandiflorum</i>  | Malvaceae | 17 | <i>Ravenia spectabilis</i>        | Rutaceae       |
| 16 | <i>Pterospermum acerifolium</i>   | Malvaceae | 17 | <i>Toddalia asiatica</i>          | Rutaceae       |
| 16 | <i>Reevesia thyrsoidea</i>        | Malvaceae | 17 | <i>Triphasia trifolia</i>         | Rutaceae       |
| 16 | <i>Schoutenia glomerata</i>       | Malvaceae | 17 | <i>Zanthoxylum avicennae</i>      | Rutaceae       |
| 16 | <i>Sida acuta</i>                 | Malvaceae | 17 | <i>Zanthoxylum nitidum</i>        | Rutaceae       |
| 16 | <i>Sida alnifolia</i>             | Malvaceae | 17 | <i>Zanthoxylum scandens</i>       | Rutaceae       |
| 16 | <i>Sida cordata</i>               | Malvaceae | 18 | <i>Swietenia macrophylla</i>      | Meliaceae      |
| 16 | <i>Sida cordifolia</i>            | Malvaceae | 18 | <i>Swietenia mahagoni</i>         | Meliaceae      |
| 16 | <i>Sida mysorensis</i>            | Malvaceae | 18 | <i>Toona sinensis</i>             | Meliaceae      |
| 16 | <i>Sida rhombifolia</i>           | Malvaceae | 18 | <i>Xylocarpus granatum</i>        | Meliaceae      |
| 16 | <i>Sida spinosa</i>               | Malvaceae | 18 | <i>Xylocarpus moluccensis</i>     | Meliaceae      |
| 16 | <i>Sterculia coccinea</i>         | Malvaceae | 19 | <i>Bruguiera cylindrica</i>       | Rhizophoraceae |
| 16 | <i>Sterculia cordata</i>          | Malvaceae | 19 | <i>Bruguiera gymnorhiza</i>       | Rhizophoraceae |
| 16 | <i>Talipariti tiliaceum</i>       | Malvaceae |    |                                   |                |
| 16 | <i>Theobroma cacao</i>            | Malvaceae |    |                                   |                |
| 16 | <i>Thespesia lampas</i>           | Malvaceae |    |                                   |                |

|    |                                    |                |    |                                  |          |
|----|------------------------------------|----------------|----|----------------------------------|----------|
| 19 | <i>Bruguiera parviflora</i>        | Rhizophoraceae | 23 | <i>Prunus cerasoides</i>         | Rosaceae |
| 19 | <i>Bruguiera sexangula</i>         | Rhizophoraceae | 23 | <i>Prunus domestica</i>          | Rosaceae |
| 19 | <i>Carallia brachiata</i>          | Rhizophoraceae | 23 | <i>Prunus persica</i>            | Rosaceae |
| 19 | <i>Ceriops decandra</i>            | Rhizophoraceae | 23 | <i>Prunus salicina</i>           | Rosaceae |
| 19 | <i>Ceriops tagal</i>               | Rhizophoraceae | 23 | <i>Pyrus communis</i>            | Rosaceae |
| 19 | <i>Gynotroches axillaris</i>       | Rhizophoraceae | 23 | <i>Pyrus pyrifolia</i>           | Rosaceae |
| 19 | <i>Rhizophora apiculata</i>        | Rhizophoraceae | 23 | <i>Rhaphiolepis indica</i>       | Rosaceae |
| 19 | <i>Rhizophora mucronata</i>        | Rhizophoraceae | 23 | <i>Spiraea cantoniensis</i>      | Rosaceae |
| 19 | <i>Rhizophora stylosa</i>          | Rhizophoraceae | 23 | <i>Spiraea japonica</i>          | Rosaceae |
| 20 | <i>Breynia cernua</i>              | Phyllanthaceae | 23 | <i>Spiraea thunbergii</i>        | Rosaceae |
| 20 | <i>Flueggea virosa</i>             | Phyllanthaceae | 24 | <i>Artocarpus altilis</i>        | Moraceae |
| 20 | <i>Glochidion philippicum</i>      | Phyllanthaceae | 24 | <i>Artocarpus elasticus</i>      | Moraceae |
| 20 | <i>Glochidion rubrum</i>           | Phyllanthaceae | 24 | <i>Artocarpus glaucus</i>        | Moraceae |
| 20 | <i>Glochidion zeylanicum</i>       | Phyllanthaceae | 24 | <i>Artocarpus heterophyllus</i>  | Moraceae |
| 20 | <i>Phyllanthus acidus</i>          | Phyllanthaceae | 24 | <i>Artocarpus integer</i>        | Moraceae |
| 20 | <i>Phyllanthus acutissimus</i>     | Phyllanthaceae | 24 | <i>Artocarpus rigidus</i>        | Moraceae |
| 20 | <i>Phyllanthus emblica</i>         | Phyllanthaceae | 24 | <i>Morus alba</i>                | Moraceae |
| 20 | <i>Phyllanthus gracilipes</i>      | Phyllanthaceae | 24 | <i>Morus australis</i>           | Moraceae |
| 20 | <i>Phyllanthus maderaspatensis</i> | Phyllanthaceae | 24 | <i>Morus macroura</i>            | Moraceae |
| 20 | <i>Phyllanthus microcarpus</i>     | Phyllanthaceae | 24 | <i>Streblus asper</i>            | Moraceae |
| 20 | <i>Phyllanthus niruri</i>          | Phyllanthaceae | 24 | <i>Streblus taxoides</i>         | Moraceae |
| 20 | <i>Phyllanthus pulcher</i>         | Phyllanthaceae | 25 | <i>Albizia procera</i>           | Fabaceae |
| 20 | <i>Phyllanthus reticulatus</i>     | Phyllanthaceae | 25 | <i>Albizia saman</i>             | Fabaceae |
| 20 | <i>Phyllanthus urinaria</i>        | Phyllanthaceae | 25 | <i>Archidendron clypearia</i>    | Fabaceae |
| 20 | <i>Phyllanthus virgatus</i>        | Phyllanthaceae | 25 | <i>Biancaea sappan</i>           | Fabaceae |
| 20 | <i>Sauropus androgynus</i>         | Phyllanthaceae | 25 | <i>Caesalpinia digyna</i>        | Fabaceae |
| 20 | <i>Sauropus bacciformis</i>        | Phyllanthaceae | 25 | <i>Caesalpinia globulorum</i>    | Fabaceae |
| 20 | <i>Sauropus macranthus</i>         | Phyllanthaceae | 25 | <i>Caesalpinia pulcherrima</i>   | Fabaceae |
| 20 | <i>Sauropus rhamnoides</i>         | Phyllanthaceae | 25 | <i>Calliandra brevipes</i>       | Fabaceae |
| 21 | <i>Calophyllum inophyllum</i>      | Calophyllaceae | 25 | <i>Calliandra calothyrsus</i>    | Fabaceae |
| 21 | <i>Calophyllum soulattri</i>       | Calophyllaceae | 25 | <i>Calliandra haematocephala</i> | Fabaceae |
| 21 | <i>Calophyllum teysmannii</i>      | Calophyllaceae | 25 | <i>Cassia fistula</i>            | Fabaceae |
| 21 | <i>Mammea americana</i>            | Calophyllaceae | 25 | <i>Cassia grandis</i>            | Fabaceae |
| 21 | <i>Mesua ferrea</i>                | Calophyllaceae | 25 | <i>Cassia javanica</i>           | Fabaceae |
| 22 | <i>Garcinia celebica</i>           | Clusiaceae     | 25 | <i>Cassia roxburghii</i>         | Fabaceae |
| 22 | <i>Garcinia dulcis</i>             | Clusiaceae     | 25 | <i>Cathormion umbellatum</i>     | Fabaceae |
| 22 | <i>Garcinia mangostana</i>         | Clusiaceae     | 25 | <i>Chamaecrista absus</i>        | Fabaceae |
| 22 | <i>Garcinia nervosa</i>            | Clusiaceae     | 25 | <i>Chamaecrista nictitans</i>    | Fabaceae |
| 22 | <i>Garcinia parvifolia</i>         | Clusiaceae     | 25 | <i>Delonix regia</i>             | Fabaceae |
| 22 | <i>Garcinia rostrata</i>           | Clusiaceae     | 25 | <i>Dichrostachys cinerea</i>     | Fabaceae |
| 22 | <i>Pentadesma butyracea</i>        | Clusiaceae     | 25 | <i>Entada gigas</i>              | Fabaceae |
| 23 | <i>Eriobotrya japonica</i>         | Rosaceae       | 25 | <i>Entada phaseoloides</i>       | Fabaceae |
| 23 | <i>Malus domestica</i>             | Rosaceae       | 25 | <i>Haematoxylum campechianum</i> | Fabaceae |
| 23 | <i>Neillia thyrsoiflora</i>        | Rosaceae       | 25 | <i>Inga laurina</i>              | Fabaceae |
| 23 | <i>Photinia integrifolia</i>       | Rosaceae       | 25 | <i>Inga vera</i>                 | Fabaceae |
| 23 | <i>Prunus armeniaca</i>            | Rosaceae       | 25 | <i>Leucaena leucocephala</i>     | Fabaceae |
| 23 | <i>Prunus brachybotrya</i>         | Rosaceae       |    |                                  |          |

|    |                                  |          |    |                                  |          |
|----|----------------------------------|----------|----|----------------------------------|----------|
| 25 | <i>Leucaena pulverulenta</i>     | Fabaceae | 25 | <i>Acacia suaveolens</i>         | Fabaceae |
| 25 | <i>Mimosa pigra</i>              | Fabaceae | 25 | <i>Acacia vestita</i>            | Fabaceae |
| 25 | <i>Moullava spicata</i>          | Fabaceae | 25 | <i>Acaciella glauca</i>          | Fabaceae |
| 25 | <i>Neptunia plena</i>            | Fabaceae | 25 | <i>Acrocarpus fraxinifolius</i>  | Fabaceae |
| 25 | <i>Pararchidendron pruinatum</i> | Fabaceae | 25 | <i>Adenanthera microsperma</i>   | Fabaceae |
| 25 | <i>Paraserianthes lophantha</i>  | Fabaceae | 25 | <i>Adenanthera pavonina</i>      | Fabaceae |
| 25 | <i>Parkia speciosa</i>           | Fabaceae | 25 | <i>Albizia chinensis</i>         | Fabaceae |
| 25 | <i>Parkia timoriana</i>          | Fabaceae | 25 | <i>Albizia lebbek</i>            | Fabaceae |
| 25 | <i>Parkinsonia aculeata</i>      | Fabaceae | 25 | <i>Albizia lucidior</i>          | Fabaceae |
| 25 | <i>Peltoporum pterocarpum</i>    | Fabaceae | 26 | <i>Abrus precatorius</i>         | Fabaceae |
| 25 | <i>Pithecellobium dulce</i>      | Fabaceae | 26 | <i>Aeschynomene afraspera</i>    | Fabaceae |
| 25 | <i>Pithecellobium unguicatum</i> | Fabaceae | 26 | <i>Aeschynomene americana</i>    | Fabaceae |
| 25 | <i>Prosopis chilensis</i>        | Fabaceae | 26 | <i>Aeschynomene aspera</i>       | Fabaceae |
| 25 | <i>Prosopis juliflora</i>        | Fabaceae | 26 | <i>Aeschynomene elaphroxylon</i> | Fabaceae |
| 25 | <i>Schizolobium parahyba</i>     | Fabaceae | 26 | <i>Aeschynomene elegans</i>      | Fabaceae |
| 25 | <i>Senegalia catechu</i>         | Fabaceae | 26 | <i>Aeschynomene falcata</i>      | Fabaceae |
| 25 | <i>Senegalia pennata</i>         | Fabaceae | 26 | <i>Aeschynomene indica</i>       | Fabaceae |
| 25 | <i>Senegalia rugata</i>          | Fabaceae | 26 | <i>Aeschynomene uniflora</i>     | Fabaceae |
| 25 | <i>Senegalia senegal</i>         | Fabaceae | 26 | <i>Aeschynomene villosa</i>      | Fabaceae |
| 25 | <i>Senna alata</i>               | Fabaceae | 26 | <i>Aganope heptaphylla</i>       | Fabaceae |
| 25 | <i>Senna auriculata</i>          | Fabaceae | 26 | <i>Aganope thyrsoiflora</i>      | Fabaceae |
| 25 | <i>Senna bicapsularis</i>        | Fabaceae | 26 | <i>Alysicarpus heyneanus</i>     | Fabaceae |
| 25 | <i>Senna didymobotrya</i>        | Fabaceae | 26 | <i>Alysicarpus vaginalis</i>     | Fabaceae |
| 25 | <i>Senna hirsuta</i>             | Fabaceae | 26 | <i>Butea monosperma</i>          | Fabaceae |
| 25 | <i>Senna italica</i>             | Fabaceae | 26 | <i>Cajanus cajan</i>             | Fabaceae |
| 25 | <i>Senna obtusifolia</i>         | Fabaceae | 26 | <i>Calopogonium mucunoides</i>   | Fabaceae |
| 25 | <i>Senna occidentalis</i>        | Fabaceae | 26 | <i>Calpurnia aurea</i>           | Fabaceae |
| 25 | <i>Senna pendula</i>             | Fabaceae | 26 | <i>Camoensia scandens</i>        | Fabaceae |
| 25 | <i>Senna septemtrionalis</i>     | Fabaceae | 26 | <i>Canavalia cathartica</i>      | Fabaceae |
| 25 | <i>Senna siamea</i>              | Fabaceae | 26 | <i>Canavalia ensiformis</i>      | Fabaceae |
| 25 | <i>Senna sophera</i>             | Fabaceae | 26 | <i>Canavalia gladiata</i>        | Fabaceae |
| 25 | <i>Senna sulfurea</i>            | Fabaceae | 26 | <i>Canavalia rosea</i>           | Fabaceae |
| 25 | <i>Vachellia farnesiana</i>      | Fabaceae | 26 | <i>Castanospermum australe</i>   | Fabaceae |
| 25 | <i>Vachellia leucophloea</i>     | Fabaceae | 26 | <i>Christia vespertilionis</i>   | Fabaceae |
| 25 | <i>Vachellia nilotica</i>        | Fabaceae | 26 | <i>Cicer arietinum</i>           | Fabaceae |
| 25 | <i>Zapoteca tetragona</i>        | Fabaceae | 26 | <i>Clitoria ternatea</i>         | Fabaceae |
| 25 | <i>Acacia auriculiformis</i>     | Fabaceae | 26 | <i>Codariocalyx motorius</i>     | Fabaceae |
| 25 | <i>Acacia baileyana</i>          | Fabaceae | 26 | <i>Crotalaria acicularis</i>     | Fabaceae |
| 25 | <i>Acacia cultriformis</i>       | Fabaceae | 26 | <i>Crotalaria albida</i>         | Fabaceae |
| 25 | <i>Acacia dealbata</i>           | Fabaceae | 26 | <i>Crotalaria chinensis</i>      | Fabaceae |
| 25 | <i>Acacia decurrens</i>          | Fabaceae | 26 | <i>Crotalaria grandiflora</i>    | Fabaceae |
| 25 | <i>Acacia elata</i>              | Fabaceae | 26 | <i>Crotalaria incana</i>         | Fabaceae |
| 25 | <i>Acacia falcata</i>            | Fabaceae | 26 | <i>Crotalaria juncea</i>         | Fabaceae |
| 25 | <i>Acacia linifolia</i>          | Fabaceae | 26 | <i>Crotalaria medicaginea</i>    | Fabaceae |
| 25 | <i>Acacia longifolia</i>         | Fabaceae | 26 | <i>Crotalaria mesopontica</i>    | Fabaceae |
| 25 | <i>Acacia longifolia</i>         | Fabaceae |    |                                  |          |
| 25 | <i>Acacia pruinosa</i>           | Fabaceae |    |                                  |          |
| 25 | <i>Acacia spectabilis</i>        | Fabaceae |    |                                  |          |

|    |                                 |          |    |                                    |          |
|----|---------------------------------|----------|----|------------------------------------|----------|
| 26 | <i>Crotalaria micans</i>        | Fabaceae | 26 | <i>Indigofera suffruticosa</i>     | Fabaceae |
| 26 | <i>Crotalaria pallida</i>       | Fabaceae | 26 | <i>Indigofera tinctoria</i>        | Fabaceae |
| 26 | <i>Crotalaria retusa</i>        | Fabaceae | 26 | <i>Indigofera trifoliata</i>       | Fabaceae |
| 26 | <i>Crotalaria sessiliflora</i>  | Fabaceae | 26 | <i>Indigofera trita</i>            | Fabaceae |
| 26 | <i>Crotalaria trichotoma</i>    | Fabaceae | 26 | <i>Indigofera zollingeriana</i>    | Fabaceae |
| 26 | <i>Crotalaria verrucosa</i>     | Fabaceae | 26 | <i>Inocarpus fagifer</i>           | Fabaceae |
| 26 | <i>Cyamopsis tetragonoloba</i>  | Fabaceae | 26 | <i>Lablab purpureus</i>            | Fabaceae |
| 26 | <i>Dalbergia candenatensis</i>  | Fabaceae | 26 | <i>Lathyrus sativus</i>            | Fabaceae |
| 26 | <i>Dalbergia lanceolaria</i>    | Fabaceae | 26 | <i>Lens culinaris</i>              | Fabaceae |
| 26 | <i>Dalbergia latifolia</i>      | Fabaceae | 26 | <i>Lespedeza cuneata</i>           | Fabaceae |
| 26 | <i>Dalbergia pinnata</i>        | Fabaceae | 26 | <i>Lupinus luteus</i>              | Fabaceae |
| 26 | <i>Dalbergia sissoo</i>         | Fabaceae | 26 | <i>Lupinus mutabilis</i>           | Fabaceae |
| 26 | <i>Derris elliptica</i>         | Fabaceae | 26 | <i>Macroptilium lathyroides</i>    | Fabaceae |
| 26 | <i>Derris microphylla</i>       | Fabaceae | 26 | <i>Macrotyloma uniflorum</i>       | Fabaceae |
| 26 | <i>Derris montana</i>           | Fabaceae | 26 | <i>Medicago sativa</i>             | Fabaceae |
| 26 | <i>Derris pubipetala</i>        | Fabaceae | 26 | <i>Melilotus indicus</i>           | Fabaceae |
| 26 | <i>Derris scandens</i>          | Fabaceae | 26 | <i>Milletia pinnata</i>            | Fabaceae |
| 26 | <i>Derris trifoliata</i>        | Fabaceae | 26 | <i>Milletia xylocarpia</i>         | Fabaceae |
| 26 | <i>Desmodium gangeticum</i>     | Fabaceae | 26 | <i>Mucuna gigantea</i>             | Fabaceae |
| 26 | <i>Desmodium heterocarpon</i>   | Fabaceae | 26 | <i>Mucuna pruriens</i>             | Fabaceae |
| 26 | <i>Desmodium intortum</i>       | Fabaceae | 26 | <i>Myroxylon balsamum</i>          | Fabaceae |
| 26 | <i>Desmodium laxiflorum</i>     | Fabaceae | 26 | <i>Myroxylon peruiferum</i>        | Fabaceae |
| 26 | <i>Desmodium microphyllum</i>   | Fabaceae | 26 | <i>Ormosia sumatrana</i>           | Fabaceae |
| 26 | <i>Desmodium renifolium</i>     | Fabaceae | 26 | <i>Ornithopus sativus</i>          | Fabaceae |
| 26 | <i>Desmodium styracifolium</i>  | Fabaceae | 26 | <i>Pachyrhizus erosus</i>          | Fabaceae |
| 26 | <i>Desmodium tortuosum</i>      | Fabaceae | 26 | <i>Parochetus communis</i>         | Fabaceae |
| 26 | <i>Desmodium triflorum</i>      | Fabaceae | 26 | <i>Phaseolus coccineus</i>         | Fabaceae |
| 26 | <i>Desmodium uncinatum</i>      | Fabaceae | 26 | <i>Phaseolus lunatus</i>           | Fabaceae |
| 26 | <i>Dioclea reflexa</i>          | Fabaceae | 26 | <i>Phaseolus vulgaris</i>          | Fabaceae |
| 26 | <i>Dolichos trilobus</i>        | Fabaceae | 26 | <i>Phyllodium elegans</i>          | Fabaceae |
| 26 | <i>Dumasia villosa</i>          | Fabaceae | 26 | <i>Phyllodium pulchellum</i>       | Fabaceae |
| 26 | <i>Erythrina crista-galli</i>   | Fabaceae | 26 | <i>Pisum sativum</i>               | Fabaceae |
| 26 | <i>Flemingia lineata</i>        | Fabaceae | 26 | <i>Psophocarpus scandens</i>       | Fabaceae |
| 26 | <i>Flemingia macrophylla</i>    | Fabaceae | 26 | <i>Psophocarpus tetragonolobus</i> | Fabaceae |
| 26 | <i>Flemingia strobilifera</i>   | Fabaceae | 26 | <i>Pterocarpus indicus</i>         | Fabaceae |
| 26 | <i>Galactia striata</i>         | Fabaceae | 26 | <i>Pueraria montana</i>            | Fabaceae |
| 26 | <i>Galactia tenuiflora</i>      | Fabaceae | 26 | <i>Sesbania bispinosa</i>          | Fabaceae |
| 26 | <i>Gliricidia maculata</i>      | Fabaceae | 26 | <i>Sesbania cannabina</i>          | Fabaceae |
| 26 | <i>Gliricidia sepium</i>        | Fabaceae | 26 | <i>Sesbania grandiflora</i>        | Fabaceae |
| 26 | <i>Glycine max</i>              | Fabaceae | 26 | <i>Sesbania sericea</i>            | Fabaceae |
| 26 | <i>Glycine soja</i>             | Fabaceae | 26 | <i>Sesbania sesban</i>             | Fabaceae |
| 26 | <i>Hegnera obcordata</i>        | Fabaceae | 26 | <i>Shuteria involucreta</i>        | Fabaceae |
| 26 | <i>Hylodesmum laxum</i>         | Fabaceae | 26 | <i>Sophora tomentosa</i>           | Fabaceae |
| 26 | <i>Indigofera arrecta</i>       | Fabaceae | 26 | <i>Spartium junceum</i>            | Fabaceae |
| 26 | <i>Indigofera cordifolia</i>    | Fabaceae | 26 | <i>Strongylodon macrobotrys</i>    | Fabaceae |
| 26 | <i>Indigofera longiracemosa</i> | Fabaceae | 26 | <i>Tephrosia candida</i>           | Fabaceae |
|    |                                 |          | 26 | <i>Tephrosia purpurea</i>          | Fabaceae |



|    |                               |          |
|----|-------------------------------|----------|
| 26 | <i>Tephrosia villosa</i>      | Fabaceae |
| 26 | <i>Tephrosia vogelii</i>      | Fabaceae |
| 26 | <i>Teramnus labialis</i>      | Fabaceae |
| 26 | <i>Trifolium alexandrinum</i> | Fabaceae |
| 26 | <i>Trifolium campestre</i>    | Fabaceae |
| 26 | <i>Trifolium dubium</i>       | Fabaceae |
| 26 | <i>Trifolium pratense</i>     | Fabaceae |
| 26 | <i>Trifolium repens</i>       | Fabaceae |
| 26 | <i>Ulex europaeus</i>         | Fabaceae |
| 26 | <i>Uraria crinita</i>         | Fabaceae |
| 26 | <i>Uraria lagopodoides</i>    | Fabaceae |
| 26 | <i>Vicia faba</i>             | Fabaceae |
| 26 | <i>Vicia hirsuta</i>          | Fabaceae |
| 26 | <i>Vicia sativa</i>           | Fabaceae |
| 26 | <i>Vigna hosei</i>            | Fabaceae |
| 26 | <i>Vigna mungo</i>            | Fabaceae |
| 26 | <i>Vigna radiata</i>          | Fabaceae |
| 26 | <i>Vigna subterranea</i>      | Fabaceae |
| 26 | <i>Vigna unguiculata</i>      | Fabaceae |
| 26 | <i>Vigna vexillata</i>        | Fabaceae |

**Table S3. Species and families within 'cold clades' of the analysis using all seed plant species, introduced and native.**

| <b>Clade</b> | <b>Species</b>                    | <b>Family</b>    |   |                                       |             |
|--------------|-----------------------------------|------------------|---|---------------------------------------|-------------|
| 1            | <i>Blyxa aubertii</i>             | Hydrocharitaceae | 2 | <i>Bulbophyllum coniferum</i>         | Orchidaceae |
| 1            | <i>Blyxa echinosperma</i>         | Hydrocharitaceae | 2 | <i>Bulbophyllum flabellum-veneris</i> | Orchidaceae |
| 1            | <i>Enhalus acoroides</i>          | Hydrocharitaceae | 2 | <i>Bulbophyllum lobbii</i>            | Orchidaceae |
| 1            | <i>Halophila decipiens</i>        | Hydrocharitaceae | 2 | <i>Bulbophyllum macranthum</i>        | Orchidaceae |
| 1            | <i>Halophila minor</i>            | Hydrocharitaceae | 2 | <i>Bulbophyllum medusae</i>           | Orchidaceae |
| 1            | <i>Halophila ovalis</i>           | Hydrocharitaceae | 2 | <i>Bulbophyllum membranaceum</i>      | Orchidaceae |
| 1            | <i>Hydrilla verticillata</i>      | Hydrocharitaceae | 2 | <i>Bulbophyllum mutabile</i>          | Orchidaceae |
| 1            | <i>Hydrocharis dubia</i>          | Hydrocharitaceae | 2 | <i>Bulbophyllum obtusum</i>           | Orchidaceae |
| 1            | <i>Hydrocharis morsus-ranae</i>   | Hydrocharitaceae | 2 | <i>Bulbophyllum ovalifolium</i>       | Orchidaceae |
| 1            | <i>Limnobium laevigatum</i>       | Hydrocharitaceae | 2 | <i>Bulbophyllum purpurascens</i>      | Orchidaceae |
| 1            | <i>Najas gracillima</i>           | Hydrocharitaceae | 2 | <i>Bulbophyllum sulcatum</i>          | Orchidaceae |
| 1            | <i>Najas minor</i>                | Hydrocharitaceae | 2 | <i>Bulbophyllum uniflorum</i>         | Orchidaceae |
| 1            | <i>Najas tenuifolia</i>           | Hydrocharitaceae | 2 | <i>Bulbophyllum vaginatum</i>         | Orchidaceae |
| 1            | <i>Ottelia alismoides</i>         | Hydrocharitaceae | 2 | <i>Caladenia carnea</i>               | Orchidaceae |
| 1            | <i>Thalassia hemprichii</i>       | Hydrocharitaceae | 2 | <i>Caladenia catenata</i>             | Orchidaceae |
| 2            | <i>Aerides falcata</i>            | Orchidaceae      | 2 | <i>Calanthe angustifolia</i>          | Orchidaceae |
| 2            | <i>Aerides lawrenceae</i>         | Orchidaceae      | 2 | <i>Calanthe sylvatica</i>             | Orchidaceae |
| 2            | <i>Aerides multiflora</i>         | Orchidaceae      | 2 | <i>Calanthe triplicata</i>            | Orchidaceae |
| 2            | <i>Aerides odorata</i>            | Orchidaceae      | 2 | <i>Callostylis rigida</i>             | Orchidaceae |
| 2            | <i>Aerides quinquevulnera</i>     | Orchidaceae      | 2 | <i>Ceratochilus biglandulosus</i>     | Orchidaceae |
| 2            | <i>Agrostophyllum majus</i>       | Orchidaceae      | 2 | <i>Chrysoglossum ornatum</i>          | Orchidaceae |
| 2            | <i>Agrostophyllum stipulatum</i>  | Orchidaceae      | 2 | <i>Cleisostoma subulatum</i>          | Orchidaceae |
| 2            | <i>Angraecum eburneum</i>         | Orchidaceae      | 2 | <i>Cleisostoma williamsonii</i>       | Orchidaceae |
| 2            | <i>Angraecum eichlerianum</i>     | Orchidaceae      | 2 | <i>Coelogyne asperata</i>             | Orchidaceae |
| 2            | <i>Angraecum leonis</i>           | Orchidaceae      | 2 | <i>Coelogyne cristata</i>             | Orchidaceae |
| 2            | <i>Angraecum sesquipedale</i>     | Orchidaceae      | 2 | <i>Coelogyne flexuosa</i>             | Orchidaceae |
| 2            | <i>Anoectochilus roxburghii</i>   | Orchidaceae      | 2 | <i>Coelogyne mayeriana</i>            | Orchidaceae |
| 2            | <i>Appendicula cornuta</i>        | Orchidaceae      | 2 | <i>Coelogyne ovalis</i>               | Orchidaceae |
| 2            | <i>Arachnis flos-aeris</i>        | Orchidaceae      | 2 | <i>Coelogyne swaniana</i>             | Orchidaceae |
| 2            | <i>Arundina graminifolia</i>      | Orchidaceae      | 2 | <i>Coelogyne viscosa</i>              | Orchidaceae |
| 2            | <i>Ascochilus emarginatus</i>     | Orchidaceae      | 2 | <i>Collabium simplex</i>              | Orchidaceae |
| 2            | <i>Bogoria raciborskii</i>        | Orchidaceae      | 2 | <i>Corybas carinatus</i>              | Orchidaceae |
| 2            | <i>Bromheadia finlaysoniana</i>   | Orchidaceae      | 2 | <i>Corymborkis veratrifolia</i>       | Orchidaceae |
| 2            | <i>Broughtonia sanguinea</i>      | Orchidaceae      | 2 | <i>Crepidium acuminatum</i>           | Orchidaceae |
| 2            | <i>Bulbophyllum angustifolium</i> | Orchidaceae      | 2 | <i>Crepidium oculatum</i>             | Orchidaceae |
| 2            | <i>Bulbophyllum auratum</i>       | Orchidaceae      | 2 | <i>Crepidium perakense</i>            | Orchidaceae |
| 2            | <i>Bulbophyllum bakhuizenii</i>   | Orchidaceae      | 2 | <i>Cymbidium aloifolium</i>           | Orchidaceae |
| 2            | <i>Bulbophyllum clandestinum</i>  | Orchidaceae      |   |                                       |             |

|   |                                  |             |   |                                    |             |
|---|----------------------------------|-------------|---|------------------------------------|-------------|
| 2 | <i>Cymbidium atropurpureum</i>   | Orchidaceae | 2 | <i>Dendrobium moschatum</i>        | Orchidaceae |
| 2 | <i>Cymbidium bicolor</i>         | Orchidaceae | 2 | <i>Dendrobium mutabile</i>         | Orchidaceae |
| 2 | <i>Cymbidium dayanum</i>         | Orchidaceae | 2 | <i>Dendrobium nobile</i>           | Orchidaceae |
| 2 | <i>Cymbidium ensifolium</i>      | Orchidaceae | 2 | <i>Dendrobium pachyphyllum</i>     | Orchidaceae |
| 2 | <i>Cymbidium finlaysonianum</i>  | Orchidaceae | 2 | <i>Dendrobium palpebrae</i>        | Orchidaceae |
| 2 | <i>Cymbidium lancifolium</i>     | Orchidaceae | 2 | <i>Dendrobium parishii</i>         | Orchidaceae |
| 2 | <i>Cystorchis aphylla</i>        | Orchidaceae | 2 | <i>Dendrobium pendulum</i>         | Orchidaceae |
| 2 | <i>Dendrobium affine</i>         | Orchidaceae | 2 | <i>Dendrobium philippinense</i>    | Orchidaceae |
| 2 | <i>Dendrobium aloifolium</i>     | Orchidaceae | 2 | <i>Dendrobium plicatile</i>        | Orchidaceae |
| 2 | <i>Dendrobium annae</i>          | Orchidaceae | 2 | <i>Dendrobium polyanthum</i>       | Orchidaceae |
| 2 | <i>Dendrobium anosmum</i>        | Orchidaceae | 2 | <i>Dendrobium prianganense</i>     | Orchidaceae |
| 2 | <i>Dendrobium aphyllum</i>       | Orchidaceae | 2 | <i>Dendrobium pulchellum</i>       | Orchidaceae |
| 2 | <i>Dendrobium atavus</i>         | Orchidaceae | 2 | <i>Dendrobium salaccense</i>       | Orchidaceae |
| 2 | <i>Dendrobium aureilobum</i>     | Orchidaceae | 2 | <i>Dendrobium schuetzei</i>        | Orchidaceae |
| 2 | <i>Dendrobium bifalce</i>        | Orchidaceae | 2 | <i>Dendrobium secundum</i>         | Orchidaceae |
| 2 | <i>Dendrobium cariniferum</i>    | Orchidaceae | 2 | <i>Dendrobium singkawangense</i>   | Orchidaceae |
| 2 | <i>Dendrobium chrysanthum</i>    | Orchidaceae | 2 | <i>Dendrobium stuposum</i>         | Orchidaceae |
| 2 | <i>Dendrobium chrysotoxum</i>    | Orchidaceae | 2 | <i>Dendrobium subulatum</i>        | Orchidaceae |
| 2 | <i>Dendrobium crumenatum</i>     | Orchidaceae | 2 | <i>Dendrobium thyrsoflorum</i>     | Orchidaceae |
| 2 | <i>Dendrobium crystallinum</i>   | Orchidaceae | 2 | <i>Dendrobium truncatum</i>        | Orchidaceae |
| 2 | <i>Dendrobium dearei</i>         | Orchidaceae | 2 | <i>Dendrobium venustum</i>         | Orchidaceae |
| 2 | <i>Dendrobium densiflorum</i>    | Orchidaceae | 2 | <i>Dendrobium wardianum</i>        | Orchidaceae |
| 2 | <i>Dendrobium dixanthum</i>      | Orchidaceae | 2 | <i>Dendrochilum pallidiflavens</i> | Orchidaceae |
| 2 | <i>Dendrobium draconis</i>       | Orchidaceae | 2 | <i>Dimorphorchis lowii</i>         | Orchidaceae |
| 2 | <i>Dendrobium faciferum</i>      | Orchidaceae | 2 | <i>Dipodium paludosum</i>          | Orchidaceae |
| 2 | <i>Dendrobium farmeri</i>        | Orchidaceae | 2 | <i>Epidendrum ciliare</i>          | Orchidaceae |
| 2 | <i>Dendrobium findlayanum</i>    | Orchidaceae | 2 | <i>Epidendrum nocturnum</i>        | Orchidaceae |
| 2 | <i>Dendrobium formosum</i>       | Orchidaceae | 2 | <i>Epidendrum radicans</i>         | Orchidaceae |
| 2 | <i>Dendrobium gratiosissimum</i> | Orchidaceae | 2 | <i>Erythrodes blumei</i>           | Orchidaceae |
| 2 | <i>Dendrobium hasseltii</i>      | Orchidaceae | 2 | <i>Erythrodes latifolia</i>        | Orchidaceae |
| 2 | <i>Dendrobium heterocarpum</i>   | Orchidaceae | 2 | <i>Erythrorchis altissima</i>      | Orchidaceae |
| 2 | <i>Dendrobium hymenophyllum</i>  | Orchidaceae | 2 | <i>Euanthe sanderiana</i>          | Orchidaceae |
| 2 | <i>Dendrobium infundibulum</i>   | Orchidaceae | 2 | <i>Eulophia spectabilis</i>        | Orchidaceae |
| 2 | <i>Dendrobium jacobsonii</i>     | Orchidaceae | 2 | <i>Eulophia zollingeri</i>         | Orchidaceae |
| 2 | <i>Dendrobium jenkinsii</i>      | Orchidaceae | 2 | <i>Flickingeria angustifolia</i>   | Orchidaceae |
| 2 | <i>Dendrobium johnsoniae</i>     | Orchidaceae | 2 | <i>Flickingeria comata</i>         | Orchidaceae |
| 2 | <i>Dendrobium lancifolium</i>    | Orchidaceae | 2 | <i>Gastrochilus calceolaris</i>    | Orchidaceae |
| 2 | <i>Dendrobium lindleyi</i>       | Orchidaceae | 2 | <i>Gomesa flexuosa</i>             | Orchidaceae |
| 2 | <i>Dendrobium macrostachyum</i>  | Orchidaceae | 2 | <i>Gomesa forbesii</i>             | Orchidaceae |
|   |                                  |             | 2 | <i>Gomesa longipes</i>             | Orchidaceae |

|   |                               |             |   |                         |             |
|---|-------------------------------|-------------|---|-------------------------|-------------|
| 2 | <i>Gomesa varicosa</i>        | Orchidaceae | 2 | <i>Paphiopedilum</i>    | Orchidaceae |
| 2 | <i>Goodyera fumata</i>        | Orchidaceae |   | <i>barbatum</i>         |             |
| 2 | <i>Goodyera procera</i>       | Orchidaceae | 2 | <i>Paphiopedilum</i>    | Orchidaceae |
| 2 | <i>Goodyera pusilla</i>       | Orchidaceae |   | <i>bellatulum</i>       |             |
| 2 | <i>Goodyera rubicunda</i>     | Orchidaceae | 2 | <i>Paphiopedilum</i>    | Orchidaceae |
| 2 | <i>Goodyera viridiflora</i>   | Orchidaceae |   | <i>bullenianum</i>      |             |
| 2 | <i>Grammatophyllum</i>        | Orchidaceae | 2 | <i>Paphiopedilum</i>    | Orchidaceae |
|   | <i>speciosum</i>              |             |   | <i>charlesworthii</i>   |             |
| 2 | <i>Grosourdyia</i>            | Orchidaceae | 2 | <i>Paphiopedilum</i>    | Orchidaceae |
|   | <i>appendiculata</i>          |             |   | <i>ciliolare</i>        |             |
| 2 | <i>Herminium lanceum</i>      | Orchidaceae | 2 | <i>Paphiopedilum</i>    | Orchidaceae |
| 2 | <i>Hetaeria oblongifolia</i>  | Orchidaceae |   | <i>concolor</i>         |             |
| 2 | <i>Holcoglossum</i>           | Orchidaceae | 2 | <i>Paphiopedilum</i>    | Orchidaceae |
|   | <i>amesianum</i>              |             |   | <i>dayanum</i>          |             |
| 2 | <i>Holcoglossum</i>           | Orchidaceae | 2 | <i>Paphiopedilum</i>    | Orchidaceae |
|   | <i>kimballianum</i>           |             |   | <i>exul</i>             |             |
| 2 | <i>Hylophila lanceolata</i>   | Orchidaceae | 2 | <i>Paphiopedilum</i>    | Orchidaceae |
| 2 | <i>Hymenorchis javanica</i>   | Orchidaceae |   | <i>glanduliferum</i>    |             |
| 2 | <i>Laelia anceps</i>          | Orchidaceae | 2 | <i>Paphiopedilum</i>    | Orchidaceae |
| 2 | <i>Lepidogyne longifolia</i>  | Orchidaceae |   | <i>glaucophyllum</i>    |             |
| 2 | <i>Liparis bootanensis</i>    | Orchidaceae | 2 | <i>Paphiopedilum</i>    | Orchidaceae |
| 2 | <i>Liparis condylobulbon</i>  | Orchidaceae |   | <i>haynaldianum</i>     |             |
| 2 | <i>Liparis elliptica</i>      | Orchidaceae | 2 | <i>Paphiopedilum</i>    | Orchidaceae |
| 2 | <i>Liparis latifolia</i>      | Orchidaceae |   | <i>hirsutissimum</i>    |             |
| 2 | <i>Liparis montana</i>        | Orchidaceae | 2 | <i>Paphiopedilum</i>    | Orchidaceae |
| 2 | <i>Liparis odorata</i>        | Orchidaceae |   | <i>hookerae</i>         |             |
| 2 | <i>Liparis parviflora</i>     | Orchidaceae | 2 | <i>Paphiopedilum</i>    | Orchidaceae |
| 2 | <i>Liparis rheedei</i>        | Orchidaceae |   | <i>insigne</i>          |             |
| 2 | <i>Liparis viridiflora</i>    | Orchidaceae | 2 | <i>Paphiopedilum</i>    | Orchidaceae |
| 2 | <i>Ludisia discolor</i>       | Orchidaceae |   | <i>javanicum</i>        |             |
| 2 | <i>Luisia tristis</i>         | Orchidaceae | 2 | <i>Paphiopedilum</i>    | Orchidaceae |
| 2 | <i>Lycaste cruenta</i>        | Orchidaceae |   | <i>lawrenceanum</i>     |             |
| 2 | <i>Malleola baliensis</i>     | Orchidaceae | 2 | <i>Paphiopedilum</i>    | Orchidaceae |
| 2 | <i>Micropera pallida</i>      | Orchidaceae |   | <i>lowii</i>            |             |
| 2 | <i>Microsaccus griffithii</i> | Orchidaceae | 2 | <i>Paphiopedilum</i>    | Orchidaceae |
| 2 | <i>Nephelaphyllum</i>         | Orchidaceae |   | <i>mastersianum</i>     |             |
|   | <i>pulchrum</i>               |             | 2 | <i>Paphiopedilum</i>    | Orchidaceae |
| 2 | <i>Nephelaphyllum</i>         | Orchidaceae |   | <i>niveum</i>           |             |
|   | <i>tenuiflorum</i>            |             | 2 | <i>Paphiopedilum</i>    | Orchidaceae |
| 2 | <i>Nervilia concolor</i>      | Orchidaceae |   | <i>parishii</i>         |             |
| 2 | <i>Nervilia plicata</i>       | Orchidaceae | 2 | <i>Paphiopedilum</i>    | Orchidaceae |
| 2 | <i>Oberonia ensiformis</i>    | Orchidaceae |   | <i>philippinense</i>    |             |
| 2 | <i>Oberonia padangensis</i>   | Orchidaceae | 2 | <i>Paphiopedilum</i>    | Orchidaceae |
| 2 | <i>Oberonia prainiana</i>     | Orchidaceae |   | <i>rothschildianum</i>  |             |
| 2 | <i>Oeceoclades pulchra</i>    | Orchidaceae | 2 | <i>Paphiopedilum</i>    | Orchidaceae |
| 2 | <i>Oncidium altissimum</i>    | Orchidaceae |   | <i>spicerianum</i>      |             |
| 2 | <i>Oncidium boothianum</i>    | Orchidaceae | 2 | <i>Paphiopedilum</i>    | Orchidaceae |
| 2 | <i>Oncidium maculatum</i>     | Orchidaceae |   | <i>stonei</i>           |             |
| 2 | <i>Oncidium</i>               | Orchidaceae | 2 | <i>Paphiopedilum</i>    | Orchidaceae |
|   | <i>ornithorhynchum</i>        |             |   | <i>superbiens</i>       |             |
| 2 | <i>Oncidium sphacelatum</i>   | Orchidaceae | 2 | <i>Paphiopedilum</i>    | Orchidaceae |
| 2 | <i>Oncidium tigrinum</i>      | Orchidaceae |   | <i>tonsum</i>           |             |
| 2 | <i>Paphiopedilum argus</i>    | Orchidaceae | 2 | <i>Paphiopedilum</i>    | Orchidaceae |
|   |                               |             |   | <i>venustum</i>         |             |
|   |                               |             | 2 | <i>Paphiopedilum</i>    | Orchidaceae |
|   |                               |             |   | <i>victoria-regina</i>  |             |
|   |                               |             | 2 | <i>Paphiopedilum</i>    | Orchidaceae |
|   |                               |             |   | <i>villosum</i>         |             |
|   |                               |             | 2 | <i>Papilionanthe</i>    | Orchidaceae |
|   |                               |             |   | <i>hookeriana</i>       |             |
|   |                               |             | 2 | <i>Papilionanthe</i>    | Orchidaceae |
|   |                               |             |   | <i>teres</i>            |             |
|   |                               |             | 2 | <i>Paraphalaenopsis</i> | Orchidaceae |
|   |                               |             |   | <i>denevei</i>          |             |
|   |                               |             | 2 | <i>Paraphalaenopsis</i> | Orchidaceae |
|   |                               |             |   | <i>laycockii</i>        |             |
|   |                               |             | 2 | <i>Paraphalaenopsis</i> | Orchidaceae |
|   |                               |             |   | <i>serpentina</i>       |             |
|   |                               |             | 2 | <i>Peristeria elata</i> | Orchidaceae |

|   |                                |             |   |                              |             |
|---|--------------------------------|-------------|---|------------------------------|-------------|
| 2 | <i>Peristylus tentaculatus</i> | Orchidaceae | 2 | <i>Schoenorchis</i>          | Orchidaceae |
| 2 | <i>Phaius flavus</i>           | Orchidaceae |   | <i>paniculata</i>            |             |
| 2 | <i>Phaius mishmensis</i>       | Orchidaceae | 2 | <i>Spathoglottis aurea</i>   | Orchidaceae |
| 2 | <i>Phalaenopsis amabilis</i>   | Orchidaceae | 2 | <i>Spathoglottis</i>         | Orchidaceae |
| 2 | <i>Phalaenopsis</i>            | Orchidaceae |   | <i>kimballiana</i>           |             |
|   | <i>amboinensis</i>             |             | 2 | <i>Spathoglottis plicata</i> | Orchidaceae |
| 2 | <i>Phalaenopsis cornu-</i>     | Orchidaceae | 2 | <i>Specklinia lanceola</i>   | Orchidaceae |
|   | <i>cervi</i>                   |             | 2 | <i>Spiranthes sinensis</i>   | Orchidaceae |
| 2 | <i>Phalaenopsis deliciosa</i>  | Orchidaceae | 2 | <i>Stanhopea wardii</i>      | Orchidaceae |
| 2 | <i>Phalaenopsis</i>            | Orchidaceae | 2 | <i>Stichorkis disticha</i>   | Orchidaceae |
|   | <i>equestris</i>               |             | 2 | <i>Stichorkis gibbosa</i>    | Orchidaceae |
| 2 | <i>Phalaenopsis fimbriata</i>  | Orchidaceae | 2 | <i>Styloglossum</i>          | Orchidaceae |
| 2 | <i>Phalaenopsis fuscata</i>    | Orchidaceae |   | <i>speciosum</i>             |             |
| 2 | <i>Phalaenopsis gigantea</i>   | Orchidaceae | 2 | <i>Tainia latifolia</i>      | Orchidaceae |
| 2 | <i>Phalaenopsis javanica</i>   | Orchidaceae | 2 | <i>Thrixspermum</i>          | Orchidaceae |
| 2 | <i>Phalaenopsis kunstleri</i>  | Orchidaceae |   | <i>amplexicaule</i>          |             |
| 2 | <i>Phalaenopsis</i>            | Orchidaceae | 2 | <i>Thrixspermum</i>          | Orchidaceae |
|   | <i>lueddemanniana</i>          |             |   | <i>centipeda</i>             |             |
| 2 | <i>Phalaenopsis</i>            | Orchidaceae | 2 | <i>Thunia alba</i>           | Orchidaceae |
|   | <i>pulcherrima</i>             |             | 2 | <i>Trichocentrum</i>         | Orchidaceae |
| 2 | <i>Phalaenopsis</i>            | Orchidaceae |   | <i>jonesianum</i>            |             |
|   | <i>stuartiana</i>              |             | 2 | <i>Trichocentrum</i>         | Orchidaceae |
| 2 | <i>Phalaenopsis</i>            | Orchidaceae |   | <i>lanceanum</i>             |             |
|   | <i>sumatrana</i>               |             | 2 | <i>Trichocentrum</i>         | Orchidaceae |
| 2 | <i>Phalaenopsis tetraspis</i>  | Orchidaceae |   | <i>splendidum</i>            |             |
| 2 | <i>Phalaenopsis violacea</i>   | Orchidaceae | 2 | <i>Trichotosia ferox</i>     | Orchidaceae |
| 2 | <i>Pholidota articulata</i>    | Orchidaceae | 2 | <i>Vanda arcuata</i>         | Orchidaceae |
| 2 | <i>Pholidota imbricata</i>     | Orchidaceae | 2 | <i>Vanda celebica</i>        | Orchidaceae |
| 2 | <i>Phyllorchis flavescens</i>  | Orchidaceae | 2 | <i>Vanda coerulea</i>        | Orchidaceae |
| 2 | <i>Platanthera angustata</i>   | Orchidaceae | 2 | <i>Vanda dearei</i>          | Orchidaceae |
| 2 | <i>Pleione maculata</i>        | Orchidaceae | 2 | <i>Vanda devoogtii</i>       | Orchidaceae |
| 2 | <i>Polystachya concreta</i>    | Orchidaceae | 2 | <i>Vanda furva</i>           | Orchidaceae |
| 2 | <i>Pomatocalpa diffusum</i>    | Orchidaceae | 2 | <i>Vanda hastifera</i>       | Orchidaceae |
| 2 | <i>Pomatocalpa kunstleri</i>   | Orchidaceae | 2 | <i>Vanda helvola</i>         | Orchidaceae |
| 2 | <i>Pomatocalpa spicatum</i>    | Orchidaceae | 2 | <i>Vanda insignis</i>        | Orchidaceae |
| 2 | <i>Prosthechea cochleata</i>   | Orchidaceae | 2 | <i>Vanda lamellata</i>       | Orchidaceae |
| 2 | <i>Prosthechea</i>             | Orchidaceae | 2 | <i>Vanda limbata</i>         | Orchidaceae |
|   | <i>prismatocarpa</i>           |             | 2 | <i>Vanda luzonica</i>        | Orchidaceae |
| 2 | <i>Psychopsis papilio</i>      | Orchidaceae | 2 | <i>Vanda miniata</i>         | Orchidaceae |
| 2 | <i>Renanthera coccinea</i>     | Orchidaceae | 2 | <i>Vanda spathulata</i>      | Orchidaceae |
| 2 | <i>Renanthera</i>              | Orchidaceae | 2 | <i>Vanda sumatrana</i>       | Orchidaceae |
|   | <i>imschootiana</i>            |             | 2 | <i>Vanda tessellata</i>      | Orchidaceae |
| 2 | <i>Renanthera matutina</i>     | Orchidaceae | 2 | <i>Vanda tricolor</i>        | Orchidaceae |
| 2 | <i>Renanthera storiei</i>      | Orchidaceae | 2 | <i>Vandopsis gigantea</i>    | Orchidaceae |
| 2 | <i>Rhinerrhizopsis moorei</i>  | Orchidaceae | 2 | <i>Vandopsis</i>             | Orchidaceae |
| 2 | <i>Rhomboda cristata</i>       | Orchidaceae |   | <i>lissochiloides</i>        |             |
| 2 | <i>Rhynchostylis retusa</i>    | Orchidaceae | 2 | <i>Vanilla albida</i>        | Orchidaceae |
| 2 | <i>Robiquetia spathulata</i>   | Orchidaceae | 2 | <i>Vanilla aphylla</i>       | Orchidaceae |
| 2 | <i>Rossioglossum</i>           | Orchidaceae | 2 | <i>Vanilla planifolia</i>    | Orchidaceae |
|   | <i>ampliatum</i>               |             | 2 | <i>Zeuxine gracilis</i>      | Orchidaceae |
| 2 | <i>Saccolabium pusillum</i>    | Orchidaceae | 2 | <i>Zeuxine strateumatica</i> | Orchidaceae |
| 2 | <i>Sarcoglyphis comberi</i>    | Orchidaceae | 3 | <i>Aiphanes horrida</i>      | Arecaceae   |
| 2 | <i>Schoenorchis</i>            | Orchidaceae | 3 | <i>Aiphanes minima</i>       | Arecaceae   |
|   | <i>micrantha</i>               |             | 3 | <i>Areca catechu</i>         | Arecaceae   |

|   |                                    |           |   |                                    |               |
|---|------------------------------------|-----------|---|------------------------------------|---------------|
| 3 | <i>Areca triandra</i>              | Arecaceae | 3 | <i>Phoenix pusilla</i>             | Arecaceae     |
| 3 | <i>Arenga obtusifolia</i>          | Arecaceae | 3 | <i>Phoenix reclinata</i>           | Arecaceae     |
| 3 | <i>Arenga pinnata</i>              | Arecaceae | 3 | <i>Phoenix rupicola</i>            | Arecaceae     |
| 3 | <i>Arenga porphyrocarpa</i>        | Arecaceae | 3 | <i>Phoenix sylvestris</i>          | Arecaceae     |
| 3 | <i>Arenga undulatifolia</i>        | Arecaceae | 3 | <i>Pholidocarpus macrocarpus</i>   | Arecaceae     |
| 3 | <i>Arenga westerhoutii</i>         | Arecaceae | 3 | <i>Phytelephas macrocarpa</i>      | Arecaceae     |
| 3 | <i>Astrocaryum aculeatum</i>       | Arecaceae | 3 | <i>Pigafetta elata</i>             | Arecaceae     |
| 3 | <i>Astrocaryum malybo</i>          | Arecaceae | 3 | <i>Pigafetta filaris</i>           | Arecaceae     |
| 3 | <i>Astrocaryum murumuru</i>        | Arecaceae | 3 | <i>Pinanga coronata</i>            | Arecaceae     |
| 3 | <i>Bactris gasipaes</i>            | Arecaceae | 3 | <i>Plectocomia elongata</i>        | Arecaceae     |
| 3 | <i>Bactris major</i>               | Arecaceae | 3 | <i>Plectocomiopsis geminiflora</i> | Arecaceae     |
| 3 | <i>Borassus flabellifer</i>        | Arecaceae | 3 | <i>Pritchardia pacifica</i>        | Arecaceae     |
| 3 | <i>Calamus ornatus</i>             | Arecaceae | 3 | <i>Raphia farinifera</i>           | Arecaceae     |
| 3 | <i>Calamus unifarius</i>           | Arecaceae | 3 | <i>Rhapis excelsa</i>              | Arecaceae     |
| 3 | <i>Calamus viminalis</i>           | Arecaceae | 3 | <i>Rhapis humilis</i>              | Arecaceae     |
| 3 | <i>Caryota maxima</i>              | Arecaceae | 3 | <i>Rhopaloblaste ceramica</i>      | Arecaceae     |
| 3 | <i>Caryota mitis</i>               | Arecaceae | 3 | <i>Roystonea oleracea</i>          | Arecaceae     |
| 3 | <i>Caryota rumphiana</i>           | Arecaceae | 3 | <i>Roystonea regia</i>             | Arecaceae     |
| 3 | <i>Caryota urens</i>               | Arecaceae | 3 | <i>Sabal minor</i>                 | Arecaceae     |
| 3 | <i>Ceratolobus concolor</i>        | Arecaceae | 3 | <i>Salacca zalacca</i>             | Arecaceae     |
| 3 | <i>Ceratolobus pseudoconcolor</i>  | Arecaceae | 3 | <i>Saribus rotundifolius</i>       | Arecaceae     |
| 3 | <i>Chamaerops humilis</i>          | Arecaceae | 3 | <i>Thrinax radiata</i>             | Arecaceae     |
| 3 | <i>Coccothrinax argentata</i>      | Arecaceae | 3 | <i>Trachycarpus fortunei</i>       | Arecaceae     |
| 3 | <i>Coccothrinax argentea</i>       | Arecaceae | 3 | <i>Trachycarpus martianus</i>      | Arecaceae     |
| 3 | <i>Cocos nucifera</i>              | Arecaceae | 3 | <i>Verschaffeltia splendida</i>    | Arecaceae     |
| 3 | <i>Corypha taliera</i>             | Arecaceae | 4 | <i>Belosynapsis ciliata</i>        | Commelinaceae |
| 3 | <i>Corypha umbraculifera</i>       | Arecaceae | 4 | <i>Cochliostema odoratissimum</i>  | Commelinaceae |
| 3 | <i>Corypha utan</i>                | Arecaceae | 4 | <i>Commelina benghalensis</i>      | Commelinaceae |
| 3 | <i>Cyrtostachys renda</i>          | Arecaceae | 4 | <i>Commelina diffusa</i>           | Commelinaceae |
| 3 | <i>Elaeis guineensis</i>           | Arecaceae | 4 | <i>Commelina paludosa</i>          | Commelinaceae |
| 3 | <i>Euterpe oleracea</i>            | Arecaceae | 4 | <i>Cyanotis axillaris</i>          | Commelinaceae |
| 3 | <i>Jubaea chilensis</i>            | Arecaceae | 4 | <i>Cyanotis cristata</i>           | Commelinaceae |
| 3 | <i>Latania loddigesii</i>          | Arecaceae | 4 | <i>Dichorisandra thyrsiflora</i>   | Commelinaceae |
| 3 | <i>Latania lontaroides</i>         | Arecaceae | 4 | <i>Floscopa scandens</i>           | Commelinaceae |
| 3 | <i>Latania verschaffeltii</i>      | Arecaceae | 4 | <i>Geogenanthus poeppigii</i>      | Commelinaceae |
| 3 | <i>Licuala grandis</i>             | Arecaceae | 4 | <i>Gibasis geniculata</i>          | Commelinaceae |
| 3 | <i>Licuala spinosa</i>             | Arecaceae | 4 | <i>Murdannia nudiflora</i>         | Commelinaceae |
| 3 | <i>Livistona australis</i>         | Arecaceae | 4 | <i>Pollia hasskarlii</i>           | Commelinaceae |
| 3 | <i>Livistona saribus</i>           | Arecaceae | 4 | <i>Pollia thyrsiflora</i>          | Commelinaceae |
| 3 | <i>Lodoicea maldivica</i>          | Arecaceae | 4 | <i>Rhopalephora scaberrima</i>     | Commelinaceae |
| 3 | <i>Metroxylon sagu</i>             | Arecaceae | 4 | <i>Siderasis fuscata</i>           | Commelinaceae |
| 3 | <i>Nenga pumila</i>                | Arecaceae | 4 | <i>Tinantia erecta</i>             | Commelinaceae |
| 3 | <i>Nypa fruticans</i>              | Arecaceae | 4 | <i>Tradescantia spathacea</i>      | Commelinaceae |
| 3 | <i>Oncosperma tigillarum</i>       | Arecaceae |   |                                    |               |
| 3 | <i>Phoenicophorium borsigianum</i> | Arecaceae |   |                                    |               |
| 3 | <i>Phoenix canariensis</i>         | Arecaceae |   |                                    |               |
| 3 | <i>Phoenix dactylifera</i>         | Arecaceae |   |                                    |               |

|   |                                    |               |   |                                |            |
|---|------------------------------------|---------------|---|--------------------------------|------------|
| 4 | <i>Tradescantia virginiana</i>     | Commelinaceae | 7 | <i>Carex filicina</i>          | Cyperaceae |
| 4 | <i>Tradescantia zebrina</i>        | Commelinaceae | 7 | <i>Carex japonica</i>          | Cyperaceae |
| 5 | <i>Canna glauca</i>                | Cannaceae     | 7 | <i>Carex muricata</i>          | Cyperaceae |
| 5 | <i>Canna indica</i>                | Cannaceae     | 7 | <i>Carex myosurus</i>          | Cyperaceae |
| 5 | <i>Donax canniformis</i>           | Marantaceae   | 7 | <i>Carex nigra</i>             | Cyperaceae |
| 5 | <i>Halopegia blumei</i>            | Marantaceae   | 7 | <i>Carex pairae</i>            | Cyperaceae |
| 5 | <i>Maranta arundinacea</i>         | Marantaceae   | 7 | <i>Carex phacota</i>           | Cyperaceae |
| 5 | <i>Phrynium pubinerve</i>          | Marantaceae   | 7 | <i>Carex pruinosa</i>          | Cyperaceae |
| 5 | <i>Schumannianthus dichotomus</i>  | Marantaceae   | 7 | <i>Carex pseudocyperus</i>     | Cyperaceae |
| 5 | <i>Stachyphrynium latifolium</i>   | Marantaceae   | 7 | <i>Carex remota</i>            | Cyperaceae |
| 5 | <i>Stachyphrynium placentarium</i> | Marantaceae   | 7 | <i>Carex speciosa</i>          | Cyperaceae |
| 5 | <i>Stachyphrynium repens</i>       | Marantaceae   | 7 | <i>Carex stramentitia</i>      | Cyperaceae |
| 6 | <i>Aechmea aquilega</i>            | Bromeliaceae  | 7 | <i>Carex teinogyna</i>         | Cyperaceae |
| 6 | <i>Aechmea bracteata</i>           | Bromeliaceae  | 7 | <i>Cyperus compressus</i>      | Cyperaceae |
| 6 | <i>Aechmea fasciata</i>            | Bromeliaceae  | 7 | <i>Cyperus cuspidatus</i>      | Cyperaceae |
| 6 | <i>Aechmea fulgens</i>             | Bromeliaceae  | 7 | <i>Cyperus cyperoides</i>      | Cyperaceae |
| 6 | <i>Aechmea weilbachii</i>          | Bromeliaceae  | 7 | <i>Cyperus difformis</i>       | Cyperaceae |
| 6 | <i>Ananas comosus</i>              | Bromeliaceae  | 7 | <i>Cyperus exaltatus</i>       | Cyperaceae |
| 6 | <i>Billbergia amoena</i>           | Bromeliaceae  | 7 | <i>Cyperus giganteus</i>       | Cyperaceae |
| 6 | <i>Billbergia nutans</i>           | Bromeliaceae  | 7 | <i>Cyperus haspan</i>          | Cyperaceae |
| 6 | <i>Billbergia porteana</i>         | Bromeliaceae  | 7 | <i>Cyperus imbricatus</i>      | Cyperaceae |
| 6 | <i>Billbergia pyramidalis</i>      | Bromeliaceae  | 7 | <i>Cyperus involucratus</i>    | Cyperaceae |
| 6 | <i>Billbergia rosea</i>            | Bromeliaceae  | 7 | <i>Cyperus iria</i>            | Cyperaceae |
| 6 | <i>Billbergia zebrina</i>          | Bromeliaceae  | 7 | <i>Cyperus odoratus</i>        | Cyperaceae |
| 6 | <i>Bromelia pinguin</i>            | Bromeliaceae  | 7 | <i>Cyperus papyrus</i>         | Cyperaceae |
| 6 | <i>Cryptanthus beuckeri</i>        | Bromeliaceae  | 7 | <i>Cyperus pilosus</i>         | Cyperaceae |
| 6 | <i>Neoregelia pineliana</i>        | Bromeliaceae  | 7 | <i>Cyperus rotundus</i>        | Cyperaceae |
| 6 | <i>Nidularium fulgens</i>          | Bromeliaceae  | 7 | <i>Cyperus sphacelatus</i>     | Cyperaceae |
| 6 | <i>Pitcairnia atrorubens</i>       | Bromeliaceae  | 7 | <i>Cyperus squarrosus</i>      | Cyperaceae |
| 6 | <i>Pitcairnia maidifolia</i>       | Bromeliaceae  | 7 | <i>Cyperus strigosus</i>       | Cyperaceae |
| 6 | <i>Pitcairnia punicea</i>          | Bromeliaceae  | 7 | <i>Cyperus tenuispica</i>      | Cyperaceae |
| 6 | <i>Pitcairnia recurvata</i>        | Bromeliaceae  | 7 | <i>Diplacrum caricinum</i>     | Cyperaceae |
| 6 | <i>Portea kermesina</i>            | Bromeliaceae  | 7 | <i>Eleocharis atropurpurea</i> | Cyperaceae |
| 6 | <i>Quesnelia liboniana</i>         | Bromeliaceae  | 7 | <i>Eleocharis congesta</i>     | Cyperaceae |
| 6 | <i>Vriesea carinata</i>            | Bromeliaceae  | 7 | <i>Eleocharis dulcis</i>       | Cyperaceae |
| 7 | <i>Abildgaardia ovata</i>          | Cyperaceae    | 7 | <i>Eleocharis dulcis</i>       | Cyperaceae |
| 7 | <i>Actinoscirpus grossus</i>       | Cyperaceae    | 7 | <i>Eleocharis geniculata</i>   | Cyperaceae |
| 7 | <i>Bulbostylis barbata</i>         | Cyperaceae    | 7 | <i>Fimbristylis aestivalis</i> | Cyperaceae |
| 7 | <i>Bulbostylis densa</i>           | Cyperaceae    | 7 | <i>Fimbristylis complanata</i> | Cyperaceae |
| 7 | <i>Carex baccans</i>               | Cyperaceae    | 7 | <i>Fimbristylis cymosa</i>     | Cyperaceae |
| 7 | <i>Carex breviscapa</i>            | Cyperaceae    | 7 | <i>Fimbristylis dichotoma</i>  | Cyperaceae |
| 7 | <i>Carex brunnea</i>               | Cyperaceae    | 7 | <i>Fimbristylis ferruginea</i> | Cyperaceae |
| 7 | <i>Carex capillacea</i>            | Cyperaceae    | 7 | <i>Fimbristylis littoralis</i> | Cyperaceae |
| 7 | <i>Carex cruciata</i>              | Cyperaceae    | 7 | <i>Fimbristylis squarrosa</i>  | Cyperaceae |
| 7 | <i>Carex cryptostachys</i>         | Cyperaceae    | 7 | <i>Fuirena ciliaris</i>        | Cyperaceae |
| 7 | <i>Carex divulsa</i>               | Cyperaceae    | 7 | <i>Fuirena umbellata</i>       | Cyperaceae |
| 7 | <i>Carex doniana</i>               | Cyperaceae    | 7 | <i>Hypolytrum nemorum</i>      | Cyperaceae |
|   |                                    |               | 7 | <i>Isolepis fluitans</i>       | Cyperaceae |
|   |                                    |               | 7 | <i>Juncus effusus</i>          | Juncaceae  |

|   |                                      |            |   |                                    |         |
|---|--------------------------------------|------------|---|------------------------------------|---------|
| 7 | <i>Juncus inflexus</i>               | Juncaceae  | 8 | <i>Chloris gayana</i>              | Poaceae |
| 7 | <i>Kyllinga brevifolia</i>           | Cyperaceae | 8 | <i>Chloris virgata</i>             | Poaceae |
| 7 | <i>Kyllinga odorata</i>              | Cyperaceae | 8 | <i>Chrysopogon zizanioides</i>     | Poaceae |
| 7 | <i>Lipocarpa microcephala</i>        | Cyperaceae | 8 | <i>Coix lacryma-jobi</i>           | Poaceae |
| 7 | <i>Machaerina rubiginosa</i>         | Cyperaceae | 8 | <i>Cynodon dactylon</i>            | Poaceae |
| 7 | <i>Mapania cuspidata</i>             | Cyperaceae | 8 | <i>Cynodon radiatus</i>            | Poaceae |
| 7 | <i>Pycreus flavidus</i>              | Cyperaceae | 8 | <i>Cyrtococcum patens</i>          | Poaceae |
| 7 | <i>Pycreus polystachyos</i>          | Cyperaceae | 8 | <i>Cyrtococcum trigonum</i>        | Poaceae |
| 7 | <i>Pycreus sanguinolentus</i>        | Cyperaceae | 8 | <i>Dactylis glomerata</i>          | Poaceae |
| 7 | <i>Queenslandiella hyalina</i>       | Cyperaceae | 8 | <i>Dactyloctenium aegyptium</i>    | Poaceae |
| 7 | <i>Remirea maritima</i>              | Cyperaceae | 8 | <i>Dendrocalamus asper</i>         | Poaceae |
| 7 | <i>Rhynchospora colorata</i>         | Cyperaceae | 8 | <i>Dendrocalamus giganteus</i>     | Poaceae |
| 7 | <i>Rhynchospora rubra</i>            | Cyperaceae | 8 | <i>Dendrocalamus strictus</i>      | Poaceae |
| 7 | <i>Schoenoplectiella mucronata</i>   | Cyperaceae | 8 | <i>Digitaria abyssinica</i>        | Poaceae |
| 7 | <i>Schoenoplectus litoralis</i>      | Cyperaceae | 8 | <i>Digitaria bicornis</i>          | Poaceae |
| 7 | <i>Scirpodendron ghaeri</i>          | Cyperaceae | 8 | <i>Digitaria ciliaris</i>          | Poaceae |
| 7 | <i>Scleria lithosperma</i>           | Cyperaceae | 8 | <i>Digitaria fuscescens</i>        | Poaceae |
| 7 | <i>Scleria terrestris</i>            | Cyperaceae | 8 | <i>Digitaria longiflora</i>        | Poaceae |
| 8 | <i>Acroceras tonkinense</i>          | Poaceae    | 8 | <i>Digitaria radicata</i>          | Poaceae |
| 8 | <i>Agrostis gigantea</i>             | Poaceae    | 8 | <i>Digitaria sanguinalis</i>       | Poaceae |
| 8 | <i>Agrostis stolonifera</i>          | Poaceae    | 8 | <i>Digitaria violascens</i>        | Poaceae |
| 8 | <i>Alloteropsis cimicina</i>         | Poaceae    | 8 | <i>Echinochloa colona</i>          | Poaceae |
| 8 | <i>Apluda mutica</i>                 | Poaceae    | 8 | <i>Echinochloa crus-galli</i>      | Poaceae |
| 8 | <i>Arthraxon hispidus</i>            | Poaceae    | 8 | <i>Ehrharta stipoides</i>          | Poaceae |
| 8 | <i>Arundinella purpurea</i>          | Poaceae    | 8 | <i>Eleusine coracana</i>           | Poaceae |
| 8 | <i>Astrebla lappacea</i>             | Poaceae    | 8 | <i>Eleusine indica</i>             | Poaceae |
| 8 | <i>Avena fatua</i>                   | Poaceae    | 8 | <i>Enteropogon dolichostachyus</i> | Poaceae |
| 8 | <i>Avena sativa</i>                  | Poaceae    | 8 | <i>Eragrostis cilianensis</i>      | Poaceae |
| 8 | <i>Axonopus compressus</i>           | Poaceae    | 8 | <i>Eragrostis curvula</i>          | Poaceae |
| 8 | <i>Bambusa bambos</i>                | Poaceae    | 8 | <i>Eragrostis japonica</i>         | Poaceae |
| 8 | <i>Bambusa blumeana</i>              | Poaceae    | 8 | <i>Eragrostis minor</i>            | Poaceae |
| 8 | <i>Bambusa multiplex</i>             | Poaceae    | 8 | <i>Eragrostis multicaulis</i>      | Poaceae |
| 8 | <i>Bambusa tulda</i>                 | Poaceae    | 8 | <i>Eragrostis nutans</i>           | Poaceae |
| 8 | <i>Bambusa vulgaris</i>              | Poaceae    | 8 | <i>Eragrostis pilosa</i>           | Poaceae |
| 8 | <i>Brachiaria brizantha</i>          | Poaceae    | 8 | <i>Eragrostis tenella</i>          | Poaceae |
| 8 | <i>Brachyachne tenella</i>           | Poaceae    | 8 | <i>Eriochloa polystachya</i>       | Poaceae |
| 8 | <i>Brachypodium sylvaticum</i>       | Poaceae    | 8 | <i>Eriochloa punctata</i>          | Poaceae |
| 8 | <i>Briza maxima</i>                  | Poaceae    | 8 | <i>Gigantochloa atrovioacea</i>    | Poaceae |
| 8 | <i>Briza minor</i>                   | Poaceae    | 8 | <i>Gigantochloa atter</i>          | Poaceae |
| 8 | <i>Bromus catharticus</i>            | Poaceae    | 8 | <i>Gigantochloa nigrociliata</i>   | Poaceae |
| 8 | <i>Cenchrus brownii</i>              | Poaceae    | 8 | <i>Heteropogon contortus</i>       | Poaceae |
| 8 | <i>Cenchrus ciliaris</i>             | Poaceae    | 8 | <i>Holcus lanatus</i>              | Poaceae |
| 8 | <i>Centotheca lappacea</i>           | Poaceae    | 8 | <i>Hordeum vulgare</i>             | Poaceae |
| 8 | <i>Chimonobambusa quadrangularis</i> | Poaceae    | 8 | <i>Hymenachne amplexicaulis</i>    | Poaceae |
| 8 | <i>Chionachne gigantea</i>           | Poaceae    | 8 | <i>Hyparrhenia rufa</i>            | Poaceae |
| 8 | <i>Chloris barbata</i>               | Poaceae    |   |                                    |         |



|   |                                  |         |   |                                     |         |
|---|----------------------------------|---------|---|-------------------------------------|---------|
| 8 | <i>Ichnanthus pallens</i>        | Poaceae | 8 | <i>Phyllostachys aurea</i>          | Poaceae |
| 8 | <i>Imperata cylindrica</i>       | Poaceae | 8 | <i>Phyllostachys nigra</i>          | Poaceae |
| 8 | <i>Isachne albens</i>            | Poaceae | 8 | <i>Pleioblastus fortunei</i>        | Poaceae |
| 8 | <i>Isachne globosa</i>           | Poaceae | 8 | <i>Pogonatherum crinitum</i>        | Poaceae |
| 8 | <i>Ischaemum anthephoroides</i>  | Poaceae | 8 | <i>Pogonatherum paniceum</i>        | Poaceae |
| 8 | <i>Ischaemum barbatum</i>        | Poaceae | 8 | <i>Pseudechinolaena polystachya</i> | Poaceae |
| 8 | <i>Ischaemum rugosum</i>         | Poaceae | 8 | <i>Pseudoraphis spinescens</i>      | Poaceae |
| 8 | <i>Ischaemum timorense</i>       | Poaceae | 8 | <i>Pseudosasa hindsii</i>           | Poaceae |
| 8 | <i>Lagurus ovatus</i>            | Poaceae | 8 | <i>Pseudosasa japonica</i>          | Poaceae |
| 8 | <i>Leersia hexandra</i>          | Poaceae | 8 | <i>Rottboellia cochinchinensis</i>  | Poaceae |
| 8 | <i>Leptaspis zeylanica</i>       | Poaceae | 8 | <i>Rytidosperma oreoboloides</i>    | Poaceae |
| 8 | <i>Leptochloa fusca</i>          | Poaceae | 8 | <i>Rytidosperma penicillatum</i>    | Poaceae |
| 8 | <i>Lepturus repens</i>           | Poaceae | 8 | <i>Rytidosperma pilosum</i>         | Poaceae |
| 8 | <i>Lolium multiflorum</i>        | Poaceae | 8 | <i>Saccharum officinarum</i>        | Poaceae |
| 8 | <i>Lolium perenne</i>            | Poaceae | 8 | <i>Saccharum spontaneum</i>         | Poaceae |
| 8 | <i>Lolium temulentum</i>         | Poaceae | 8 | <i>Sacciolepis indica</i>           | Poaceae |
| 8 | <i>Lophatherum gracile</i>       | Poaceae | 8 | <i>Schizachyrium brevifolium</i>    | Poaceae |
| 8 | <i>Melinis minutiflora</i>       | Poaceae | 8 | <i>Schizostachyum zollingeri</i>    | Poaceae |
| 8 | <i>Melinis repens</i>            | Poaceae | 8 | <i>Secale cereale</i>               | Poaceae |
| 8 | <i>Microchloa indica</i>         | Poaceae | 8 | <i>Sehima nervosum</i>              | Poaceae |
| 8 | <i>Muhlenbergia huegelii</i>     | Poaceae | 8 | <i>Setaria barbata</i>              | Poaceae |
| 8 | <i>Neololeba atra</i>            | Poaceae | 8 | <i>Setaria italica</i>              | Poaceae |
| 8 | <i>Neyraudia reynaudiana</i>     | Poaceae | 8 | <i>Setaria palmifolia</i>           | Poaceae |
| 8 | <i>Ophiuros exaltatus</i>        | Poaceae | 8 | <i>Setaria parviflora</i>           | Poaceae |
| 8 | <i>Oplismenus burmannii</i>      | Poaceae | 8 | <i>Setaria plicata</i>              | Poaceae |
| 8 | <i>Oplismenus compositus</i>     | Poaceae | 8 | <i>Setaria pumila</i>               | Poaceae |
| 8 | <i>Oplismenus undulatifolius</i> | Poaceae | 8 | <i>Setaria verticillata</i>         | Poaceae |
| 8 | <i>Oryza glaberrima</i>          | Poaceae | 8 | <i>Setaria viridis</i>              | Poaceae |
| 8 | <i>Oryza meyeriana</i>           | Poaceae | 8 | <i>Shibataea kumasaca</i>           | Poaceae |
| 8 | <i>Oryza minuta</i>              | Poaceae | 8 | <i>Sorghum bicolor</i>              | Poaceae |
| 8 | <i>Oryza officinalis</i>         | Poaceae | 8 | <i>Sorghum halepense</i>            | Poaceae |
| 8 | <i>Oryza rufipogon</i>           | Poaceae | 8 | <i>Sorghum nitidum</i>              | Poaceae |
| 8 | <i>Oryza sativa</i>              | Poaceae | 8 | <i>Sorghum propinquum</i>           | Poaceae |
| 8 | <i>Ottochloa nodosa</i>          | Poaceae | 8 | <i>Spinifex littoreus</i>           | Poaceae |
| 8 | <i>Panicum auritum</i>           | Poaceae | 8 | <i>Sporobolus fertilis</i>          | Poaceae |
| 8 | <i>Panicum brevifolium</i>       | Poaceae | 8 | <i>Sporobolus indicus</i>           | Poaceae |
| 8 | <i>Panicum paludosum</i>         | Poaceae | 8 | <i>Sporobolus virginicus</i>        | Poaceae |
| 8 | <i>Panicum repens</i>            | Poaceae | 8 | <i>Themeda triandra</i>             | Poaceae |
| 8 | <i>Panicum sumatrense</i>        | Poaceae | 8 | <i>Thuarea involuta</i>             | Poaceae |
| 8 | <i>Panicum trichoides</i>        | Poaceae | 8 | <i>Thyrsostachys siamensis</i>      | Poaceae |
| 8 | <i>Paspalidium geminatum</i>     | Poaceae | 8 | <i>Thysanolaena latifolia</i>       | Poaceae |
| 8 | <i>Paspalum conjugatum</i>       | Poaceae | 8 | <i>Tripogon filiformis</i>          | Poaceae |
| 8 | <i>Paspalum dilatatum</i>        | Poaceae | 8 | <i>Tripsacum dactyloides</i>        | Poaceae |
| 8 | <i>Paspalum scrobiculatum</i>    | Poaceae |   |                                     |         |
| 8 | <i>Paspalum vaginatum</i>        | Poaceae |   |                                     |         |
| 8 | <i>Phalaris arundinacea</i>      | Poaceae |   |                                     |         |
| 8 | <i>Phragmites australis</i>      | Poaceae |   |                                     |         |

|    |                                       |               |    |                                    |              |
|----|---------------------------------------|---------------|----|------------------------------------|--------------|
| 8  | <i>Triticum aestivum</i>              | Poaceae       | 11 | <i>Schefflera lucescens</i>        | Araliaceae   |
| 8  | <i>Urochloa glumaris</i>              | Poaceae       | 11 | <i>Schefflera polybotrya</i>       | Araliaceae   |
| 8  | <i>Zea mays</i>                       | Poaceae       | 11 | <i>Schefflera rigida</i>           | Araliaceae   |
| 8  | <i>Zizania latifolia</i>              | Poaceae       | 11 | <i>Schefflera rugosa</i>           | Araliaceae   |
| 8  | <i>Zoysia matrella</i>                | Poaceae       | 11 | <i>Schefflera scandens</i>         | Araliaceae   |
| 9  | <i>Anemone sumatrana</i>              | Ranunculaceae | 11 | <i>Schefflera subavenis</i>        | Araliaceae   |
| 9  | <i>Clematis aristata</i>              | Ranunculaceae | 11 | <i>Schefflera tomentosa</i>        | Araliaceae   |
| 9  | <i>Clematis integrifolia</i>          | Ranunculaceae | 11 | <i>Tetrapanax papyrifer</i>        | Araliaceae   |
| 9  | <i>Clematis javana</i>                | Ranunculaceae | 11 | <i>Trachymene coerulea</i>         | Araliaceae   |
| 9  | <i>Clematis leschenaultiana</i>       | Ranunculaceae | 11 | <i>Trevesia burckii</i>            | Araliaceae   |
| 9  | <i>Clematis pickeringii</i>           | Ranunculaceae | 11 | <i>Trevesia sundaica</i>           | Araliaceae   |
| 9  | <i>Clematis terniflora</i>            | Ranunculaceae | 12 | <i>Aster indicus</i>               | Asteraceae   |
| 9  | <i>Clematis vitalba</i>               | Ranunculaceae | 12 | <i>Callistephus chinensis</i>      | Asteraceae   |
| 9  | <i>Naravelia laurifolia</i>           | Ranunculaceae | 12 | <i>Kalimeris incisa</i>            | Asteraceae   |
| 9  | <i>Ranunculus blumei</i>              | Ranunculaceae | 12 | <i>Lagenophora lanata</i>          | Asteraceae   |
| 9  | <i>Ranunculus sundaicus</i>           | Ranunculaceae | 12 | <i>Lagenophora stipitata</i>       | Asteraceae   |
| 10 | <i>Burckella macropoda</i>            | Sapotaceae    | 12 | <i>Myriactis nepalensis</i>        | Asteraceae   |
| 10 | <i>Madhuca korthalsii</i>             | Sapotaceae    | 12 | <i>Myriactis wallichii</i>         | Asteraceae   |
| 10 | <i>Madhuca malaccensis</i>            | Sapotaceae    | 12 | <i>Myriactis wightii</i>           | Asteraceae   |
| 10 | <i>Palaquium amboinense</i>           | Sapotaceae    | 13 | <i>Ammobium alatum</i>             | Asteraceae   |
| 10 | <i>Palaquium gutta</i>                | Sapotaceae    | 13 | <i>Anaphalis javanica</i>          | Asteraceae   |
| 10 | <i>Palaquium rostratum</i>            | Sapotaceae    | 13 | <i>Anaphalis longifolia</i>        | Asteraceae   |
| 10 | <i>Palaquium xanthochymum</i>         | Sapotaceae    | 13 | <i>Euchiton involucratus</i>       | Asteraceae   |
| 10 | <i>Payena acuminata</i>               | Sapotaceae    | 13 | <i>Euchiton japonicus</i>          | Asteraceae   |
| 10 | <i>Payena leerii</i>                  | Sapotaceae    | 13 | <i>Helichrysum indicum</i>         | Asteraceae   |
| 11 | <i>Aralia dasyphylla</i>              | Araliaceae    | 13 | <i>Pseudognaphalium luteoalbum</i> | Asteraceae   |
| 11 | <i>Boerlagiodendron novoguineense</i> | Araliaceae    | 13 | <i>Xerochrysum bracteatum</i>      | Asteraceae   |
| 11 | <i>Brassaiaopsis glomerulata</i>      | Araliaceae    | 14 | <i>Aeschynanthus longiflorus</i>   | Gesneriaceae |
| 11 | <i>Harmsiopanax aculeatus</i>         | Araliaceae    | 14 | <i>Cyrtandra apiculata</i>         | Gesneriaceae |
| 11 | <i>Hedera helix</i>                   | Araliaceae    | 14 | <i>Cyrtandra aurea</i>             | Gesneriaceae |
| 11 | <i>Hydrocotyle javanica</i>           | Araliaceae    | 14 | <i>Episcia cupreata</i>            | Gesneriaceae |
| 11 | <i>Hydrocotyle sibthorpioides</i>     | Araliaceae    | 14 | <i>Epithema saxatile</i>           | Gesneriaceae |
| 11 | <i>Macropanax dispermus</i>           | Araliaceae    | 14 | <i>Gloxinia perennis</i>           | Gesneriaceae |
| 11 | <i>Macropanax undulatus</i>           | Araliaceae    | 14 | <i>Kohleria amabilis</i>           | Gesneriaceae |
| 11 | <i>Osmoxylon boerlagei</i>            | Araliaceae    | 14 | <i>Liebigia speciosa</i>           | Gesneriaceae |
| 11 | <i>Polyscias cumingiana</i>           | Araliaceae    | 14 | <i>Loxonia hirsuta</i>             | Gesneriaceae |
| 11 | <i>Polyscias diversifolia</i>         | Araliaceae    | 14 | <i>Monophyllaea horsfieldii</i>    | Gesneriaceae |
| 11 | <i>Polyscias fruticosa</i>            | Araliaceae    | 14 | <i>Rhynchoglossum obliquum</i>     | Gesneriaceae |
| 11 | <i>Polyscias jackiana</i>             | Araliaceae    | 14 | <i>Rhynchotechum ellipticum</i>    | Gesneriaceae |
| 11 | <i>Polyscias javanica</i>             | Araliaceae    | 14 | <i>Rhynchotechum parviflorum</i>   | Gesneriaceae |
| 11 | <i>Polyscias nodosa</i>               | Araliaceae    | 14 | <i>Sinningia speciosa</i>          | Gesneriaceae |
| 11 | <i>Polyscias scutellaria</i>          | Araliaceae    | 14 | <i>Smithiantha multiflora</i>      | Gesneriaceae |
| 11 | <i>Schefflera aromatica</i>           | Araliaceae    | 14 | <i>Streptocarpus caulescens</i>    | Gesneriaceae |
| 11 | <i>Schefflera elliptica</i>           | Araliaceae    | 14 | <i>Streptocarpus rexii</i>         | Gesneriaceae |
| 11 | <i>Schefflera heterophylla</i>        | Araliaceae    | 14 | <i>Streptocarpus wendlandii</i>    | Gesneriaceae |

|    |                                      |             |    |                                 |             |
|----|--------------------------------------|-------------|----|---------------------------------|-------------|
| 15 | <i>Salvia coccinea</i>               | Lamiaceae   | 17 | <i>Raphistemma pulchellum</i>   | Apocynaceae |
| 15 | <i>Salvia confertiflora</i>          | Lamiaceae   | 17 | <i>Secamone elliptica</i>       | Apocynaceae |
| 15 | <i>Salvia farinacea</i>              | Lamiaceae   | 17 | <i>Telosma accedens</i>         | Apocynaceae |
| 15 | <i>Salvia misella</i>                | Lamiaceae   | 17 | <i>Telosma cordata</i>          | Apocynaceae |
| 15 | <i>Salvia occidentalis</i>           | Lamiaceae   | 17 | <i>Toxicarpus villosus</i>      | Apocynaceae |
| 15 | <i>Salvia splendens</i>              | Lamiaceae   | 17 | <i>Tylophora cissoides</i>      | Apocynaceae |
| 15 | <i>Salvia tiliifolia</i>             | Lamiaceae   | 18 | <i>Carapichea ipecacuanha</i>   | Rubiaceae   |
| 15 | <i>Salvia uliginosa</i>              | Lamiaceae   | 18 | <i>Chassalia curviflora</i>     | Rubiaceae   |
| 16 | <i>Hemigraphis alternata</i>         | Acanthaceae | 18 | <i>Coelospermum truncatum</i>   | Rubiaceae   |
| 16 | <i>Hemigraphis repanda</i>           | Acanthaceae | 18 | <i>Coptosapelta flavescens</i>  | Rubiaceae   |
| 16 | <i>Hemigraphis reptans</i>           | Acanthaceae | 18 | <i>Dentella repens</i>          | Rubiaceae   |
| 16 | <i>Hygrophila ringens</i>            | Acanthaceae | 18 | <i>Exallage costata</i>         | Rubiaceae   |
| 16 | <i>Ruellia brevifolia</i>            | Acanthaceae | 18 | <i>Gaertnera vaginata</i>       | Rubiaceae   |
| 16 | <i>Ruellia costata</i>               | Acanthaceae | 18 | <i>Galium mollugo</i>           | Rubiaceae   |
| 16 | <i>Ruellia elegans</i>               | Acanthaceae | 18 | <i>Galium rotundifolium</i>     | Rubiaceae   |
| 16 | <i>Ruellia tuberosa</i>              | Acanthaceae | 18 | <i>Galium triflorum</i>         | Rubiaceae   |
| 16 | <i>Sanchezia parvibracteata</i>      | Acanthaceae | 18 | <i>Geophila repens</i>          | Rubiaceae   |
| 16 | <i>Strobilanthes bibracteata</i>     | Acanthaceae | 18 | <i>Gynochthodes coriacea</i>    | Rubiaceae   |
| 16 | <i>Strobilanthes cernua</i>          | Acanthaceae | 18 | <i>Hedyotis coronaria</i>       | Rubiaceae   |
| 16 | <i>Strobilanthes dyeriana</i>        | Acanthaceae | 18 | <i>Knoxia sumatrensis</i>       | Rubiaceae   |
| 16 | <i>Strobilanthes hamiltoniana</i>    | Acanthaceae | 18 | <i>Lasianthus attenuatus</i>    | Rubiaceae   |
| 16 | <i>Strobilanthes repanda</i>         | Acanthaceae | 18 | <i>Lasianthus cyanocarpus</i>   | Rubiaceae   |
| 17 | <i>Asclepias curassavica</i>         | Apocynaceae | 18 | <i>Lasianthus ellipticus</i>    | Rubiaceae   |
| 17 | <i>Calotropis gigantea</i>           | Apocynaceae | 18 | <i>Lasianthus fordii</i>        | Rubiaceae   |
| 17 | <i>Cosmostigma cordatum</i>          | Apocynaceae | 18 | <i>Lasianthus hirsutus</i>      | Rubiaceae   |
| 17 | <i>Cryptostegia grandiflora</i>      | Apocynaceae | 18 | <i>Lasianthus rhinocerotis</i>  | Rubiaceae   |
| 17 | <i>Cryptostegia madagascariensis</i> | Apocynaceae | 18 | <i>Mitracarpus hirtus</i>       | Rubiaceae   |
| 17 | <i>Cynanchum ovalifolium</i>         | Apocynaceae | 18 | <i>Morinda citrifolia</i>       | Rubiaceae   |
| 17 | <i>Dischidia hirsuta</i>             | Apocynaceae | 18 | <i>Morinda coreia</i>           | Rubiaceae   |
| 17 | <i>Gomphocarpus fruticosus</i>       | Apocynaceae | 18 | <i>Mycetia cauliflora</i>       | Rubiaceae   |
| 17 | <i>Gymnanthera oblonga</i>           | Apocynaceae | 18 | <i>Mycetia javanica</i>         | Rubiaceae   |
| 17 | <i>Heterostemma acuminatum</i>       | Apocynaceae | 18 | <i>Myrmecodia tuberosa</i>      | Rubiaceae   |
| 17 | <i>Hoya carnosa</i>                  | Apocynaceae | 18 | <i>Neanotis hirsuta</i>         | Rubiaceae   |
| 17 | <i>Hoya cinnamomifolia</i>           | Apocynaceae | 18 | <i>Nertera granadensis</i>      | Rubiaceae   |
| 17 | <i>Hoya cumingiana</i>               | Apocynaceae | 18 | <i>Oldenlandia corymbosa</i>    | Rubiaceae   |
| 17 | <i>Hoya lacunosa</i>                 | Apocynaceae | 18 | <i>Oldenlandia diffusa</i>      | Rubiaceae   |
| 17 | <i>Hoya longifolia</i>               | Apocynaceae | 18 | <i>Oldenlandia herbacea</i>     | Rubiaceae   |
| 17 | <i>Hoya multiflora</i>               | Apocynaceae | 18 | <i>Oldenlandia pinifolia</i>    | Rubiaceae   |
| 17 | <i>Hoya multiflora</i>               | Apocynaceae | 18 | <i>Oldenlandia prostrata</i>    | Rubiaceae   |
| 17 | <i>Hoya puber</i>                    | Apocynaceae | 18 | <i>Oldenlandia tenelliflora</i> | Rubiaceae   |
| 17 | <i>Hoya rumphii</i>                  | Apocynaceae | 18 | <i>Oldenlandia verticillata</i> | Rubiaceae   |
| 17 | <i>Hoya vitellina</i>                | Apocynaceae | 18 | <i>Oldenlandia vestita</i>      | Rubiaceae   |
| 17 | <i>Hybanthera villosa</i>            | Apocynaceae | 18 | <i>Paederia foetida</i>         | Rubiaceae   |
| 17 | <i>Marsdenia floribunda</i>          | Apocynaceae | 18 | <i>Paederia verticillata</i>    | Rubiaceae   |
| 17 | <i>Oxystelma esculentum</i>          | Apocynaceae | 18 | <i>Pentas lanceolata</i>        | Rubiaceae   |
|    |                                      |             | 18 | <i>Pentas purpurea</i>          | Rubiaceae   |

|    |                                    |           |    |                                    |               |
|----|------------------------------------|-----------|----|------------------------------------|---------------|
| 18 | <i>Prismatomeris beccariana</i>    | Rubiaceae | 19 | <i>Tetrastigma laevigatum</i>      | Vitaceae      |
| 18 | <i>Psychotria leptothyrsa</i>      | Rubiaceae | 19 | <i>Tetrastigma papillosum</i>      | Vitaceae      |
| 18 | <i>Psychotria punctata</i>         | Rubiaceae | 19 | <i>Tetrastigma rumicispermum</i>   | Vitaceae      |
| 18 | <i>Richardia brasiliensis</i>      | Rubiaceae | 19 | <i>Vitis flexuosa</i>              | Vitaceae      |
| 18 | <i>Richardia scabra</i>            | Rubiaceae | 19 | <i>Vitis tiliifolia</i>            | Vitaceae      |
| 18 | <i>Rubia cordifolia</i>            | Rubiaceae | 19 | <i>Vitis vinifera</i>              | Vitaceae      |
| 18 | <i>Saprosma fruticosum</i>         | Rubiaceae | 20 | <i>Cephalomappa malloticarpa</i>   | Euphorbiaceae |
| 18 | <i>Serissa japonica</i>            | Rubiaceae | 20 | <i>Cnesmone javanica</i>           | Euphorbiaceae |
| 18 | <i>Spermacoce alata</i>            | Rubiaceae | 20 | <i>Dalechampia bidentata</i>       | Euphorbiaceae |
| 18 | <i>Spermacoce ocymifolia</i>       | Rubiaceae | 20 | <i>Dalechampia spathulata</i>      | Euphorbiaceae |
| 18 | <i>Spermacoce tenuior</i>          | Rubiaceae | 20 | <i>Koilodepas bantamense</i>       | Euphorbiaceae |
| 18 | <i>Spermadictyon suaveolens</i>    | Rubiaceae | 20 | <i>Melanolepis multiglandulosa</i> | Euphorbiaceae |
| 18 | <i>Urophyllum arboreum</i>         | Rubiaceae | 20 | <i>Pachystylidium hirsutum</i>     | Euphorbiaceae |
| 18 | <i>Urophyllum corymbosum</i>       | Rubiaceae | 20 | <i>Plukenetia corniculata</i>      | Euphorbiaceae |
| 19 | <i>Ampelocissus thyrsoiflora</i>   | Vitaceae  | 20 | <i>Sumbaviopsis albicans</i>       | Euphorbiaceae |
| 19 | <i>Cayratia cardiophylla</i>       | Vitaceae  | 21 | <i>Aspidopterys elliptica</i>      | Malpighiaceae |
| 19 | <i>Cayratia geniculata</i>         | Vitaceae  | 21 | <i>Aspidopterys tomentosa</i>      | Malpighiaceae |
| 19 | <i>Cayratia japonica</i>           | Vitaceae  | 21 | <i>Galphimia gracilis</i>          | Malpighiaceae |
| 19 | <i>Cayratia pedata</i>             | Vitaceae  | 21 | <i>Hiptage benghalensis</i>        | Malpighiaceae |
| 19 | <i>Cayratia trifolia</i>           | Vitaceae  | 21 | <i>Malpighia coccigera</i>         | Malpighiaceae |
| 19 | <i>Cissus adnata</i>               | Vitaceae  | 21 | <i>Malpighia glabra</i>            | Malpighiaceae |
| 19 | <i>Cissus assamica</i>             | Vitaceae  | 21 | <i>Ryssopterys timoriensis</i>     | Malpighiaceae |
| 19 | <i>Cissus discolor</i>             | Vitaceae  | 21 | <i>Sphedamnocarpus pruriens</i>    | Malpighiaceae |
| 19 | <i>Cissus hastata</i>              | Vitaceae  | 21 | <i>Tristellateia australasiae</i>  | Malpighiaceae |
| 19 | <i>Cissus javana</i>               | Vitaceae  | 22 | <i>Alsomitra macrocarpa</i>        | Cucurbitaceae |
| 19 | <i>Cissus nodosa</i>               | Vitaceae  | 22 | <i>Begonia areolata</i>            | Begoniaceae   |
| 19 | <i>Cissus quadrangularis</i>       | Vitaceae  | 22 | <i>Begonia bipinnatifida</i>       | Begoniaceae   |
| 19 | <i>Cissus repanda</i>              | Vitaceae  | 22 | <i>Begonia boliviensis</i>         | Begoniaceae   |
| 19 | <i>Cissus repens</i>               | Vitaceae  | 22 | <i>Begonia bracteata</i>           | Begoniaceae   |
| 19 | <i>Cissus rostrata</i>             | Vitaceae  | 22 | <i>Begonia coccinea</i>            | Begoniaceae   |
| 19 | <i>Cissus verticillata</i>         | Vitaceae  | 22 | <i>Begonia coriacea</i>            | Begoniaceae   |
| 19 | <i>Leea aculeata</i>               | Vitaceae  | 22 | <i>Begonia cucullata</i>           | Begoniaceae   |
| 19 | <i>Leea aequata</i>                | Vitaceae  | 22 | <i>Begonia diadema</i>             | Begoniaceae   |
| 19 | <i>Leea angulata</i>               | Vitaceae  | 22 | <i>Begonia dregei</i>              | Begoniaceae   |
| 19 | <i>Leea guineensis</i>             | Vitaceae  | 22 | <i>Begonia fuchsioides</i>         | Begoniaceae   |
| 19 | <i>Leea indica</i>                 | Vitaceae  | 22 | <i>Begonia goegoensis</i>          | Begoniaceae   |
| 19 | <i>Leea rubra</i>                  | Vitaceae  | 22 | <i>Begonia grandis</i>             | Begoniaceae   |
| 19 | <i>Parthenocissus dalzielii</i>    | Vitaceae  | 22 | <i>Begonia heracleifolia</i>       | Begoniaceae   |
| 19 | <i>Parthenocissus heterophylla</i> | Vitaceae  | 22 | <i>Begonia imperialis</i>          | Begoniaceae   |
| 19 | <i>Parthenocissus semicordata</i>  | Vitaceae  | 22 | <i>Begonia incarnata</i>           | Begoniaceae   |
| 19 | <i>Pterisanthes eriopoda</i>       | Vitaceae  | 22 | <i>Begonia isoptera</i>            | Begoniaceae   |
| 19 | <i>Tetrastigma coriaceum</i>       | Vitaceae  | 22 | <i>Begonia lepida</i>              | Begoniaceae   |
| 19 | <i>Tetrastigma curtisii</i>        | Vitaceae  | 22 | <i>Begonia longifolia</i>          | Begoniaceae   |
| 19 | <i>Tetrastigma glabratum</i>       | Vitaceae  |    |                                    |               |
| 19 | <i>Tetrastigma hookeri</i>         | Vitaceae  |    |                                    |               |

|    |                                     |               |    |                                  |               |
|----|-------------------------------------|---------------|----|----------------------------------|---------------|
| 22 | <i>Begonia maculata</i>             | Begoniaceae   | 22 | <i>Zehneria scabra</i>           | Cucurbitaceae |
| 22 | <i>Begonia manicata</i>             | Begoniaceae   | 23 | <i>Boehmeria glomerulifera</i>   | Urticaceae    |
| 22 | <i>Begonia multangula</i>           | Begoniaceae   | 23 | <i>Boehmeria japonica</i>        | Urticaceae    |
| 22 | <i>Begonia muricata</i>             | Begoniaceae   | 23 | <i>Boehmeria macrophylla</i>     | Urticaceae    |
| 22 | <i>Begonia palmata</i>              | Begoniaceae   | 23 | <i>Boehmeria nivea</i>           | Urticaceae    |
| 22 | <i>Begonia rex</i>                  | Begoniaceae   | 23 | <i>Boehmeria pilosiuscula</i>    | Urticaceae    |
| 22 | <i>Begonia robusta</i>              | Begoniaceae   | 23 | <i>Boehmeria platyphylla</i>     | Urticaceae    |
| 22 | <i>Begonia strigillosa</i>          | Begoniaceae   | 23 | <i>Boehmeria zollingeriana</i>   | Urticaceae    |
| 22 | <i>Begonia subvillosa</i>           | Begoniaceae   | 23 | <i>Chamabainia cuspidata</i>     | Urticaceae    |
| 22 | <i>Begonia tenuifolia</i>           | Begoniaceae   | 23 | <i>Cypholophus macrocephalus</i> | Urticaceae    |
| 22 | <i>Benincasa hispida</i>            | Cucurbitaceae | 23 | <i>Debregeasia longifolia</i>    | Urticaceae    |
| 22 | <i>Citrullus lanatus</i>            | Cucurbitaceae | 23 | <i>Dendrocnide sinuata</i>       | Urticaceae    |
| 22 | <i>Coccinia grandis</i>             | Cucurbitaceae | 23 | <i>Dendrocnide stimulans</i>     | Urticaceae    |
| 22 | <i>Cucumis melo</i>                 | Cucurbitaceae | 23 | <i>Droguetia iners</i>           | Urticaceae    |
| 22 | <i>Cucumis sativus</i>              | Cucurbitaceae | 23 | <i>Elatostema acuminatum</i>     | Urticaceae    |
| 22 | <i>Cucurbita moschata</i>           | Cucurbitaceae | 23 | <i>Elatostema integrifolium</i>  | Urticaceae    |
| 22 | <i>Cyclanthera brachystachya</i>    | Cucurbitaceae | 23 | <i>Elatostema macrophyllum</i>   | Urticaceae    |
| 22 | <i>Ecballium elaterium</i>          | Cucurbitaceae | 23 | <i>Elatostema nigrescens</i>     | Urticaceae    |
| 22 | <i>Gymnopetalum chinense</i>        | Cucurbitaceae | 23 | <i>Elatostema parvum</i>         | Urticaceae    |
| 22 | <i>Gymnopetalum scabrum</i>         | Cucurbitaceae | 23 | <i>Elatostema pedunculatum</i>   | Urticaceae    |
| 22 | <i>Gynostemma laxum</i>             | Cucurbitaceae | 23 | <i>Elatostema sinuatum</i>       | Urticaceae    |
| 22 | <i>Gynostemma pentaphyllum</i>      | Cucurbitaceae | 23 | <i>Elatostema strigosum</i>      | Urticaceae    |
| 22 | <i>Lagenaria siceraria</i>          | Cucurbitaceae | 23 | <i>Gonostegia hirta</i>          | Urticaceae    |
| 22 | <i>Luffa acutangula</i>             | Cucurbitaceae | 23 | <i>Gonostegia pentandra</i>      | Urticaceae    |
| 22 | <i>Luffa cylindrica</i>             | Cucurbitaceae | 23 | <i>Laportea bulbifera</i>        | Urticaceae    |
| 22 | <i>Momordica charantia</i>          | Cucurbitaceae | 23 | <i>Laportea interrupta</i>       | Urticaceae    |
| 22 | <i>Momordica dioica</i>             | Cucurbitaceae | 23 | <i>Lecanthus peduncularis</i>    | Urticaceae    |
| 22 | <i>Momordica subangulata</i>        | Cucurbitaceae | 23 | <i>Leucosyke capitellata</i>     | Urticaceae    |
| 22 | <i>Muellerargia timorensis</i>      | Cucurbitaceae | 23 | <i>Maoutia puya</i>              | Urticaceae    |
| 22 | <i>Scopellaria marginata</i>        | Cucurbitaceae | 23 | <i>Neodistemon indicum</i>       | Urticaceae    |
| 22 | <i>Sechium edule</i>                | Cucurbitaceae | 23 | <i>Nothocnide repanda</i>        | Urticaceae    |
| 22 | <i>Solena amplexicaulis</i>         | Cucurbitaceae | 23 | <i>Parietaria debilis</i>        | Urticaceae    |
| 22 | <i>Tetrameles nudiflora</i>         | Tetramelaceae | 23 | <i>Pellionia heteroloba</i>      | Urticaceae    |
| 22 | <i>Thladiantha cordifolia</i>       | Cucurbitaceae | 23 | <i>Pellionia pellionianum</i>    | Urticaceae    |
| 22 | <i>Trichosanthes cucumerina</i>     | Cucurbitaceae | 23 | <i>Pellionia repens</i>          | Urticaceae    |
| 22 | <i>Trichosanthes globosa</i>        | Cucurbitaceae | 23 | <i>Pilea glaberrima</i>          | Urticaceae    |
| 22 | <i>Trichosanthes montana</i>        | Cucurbitaceae | 23 | <i>Pilea melastomoides</i>       | Urticaceae    |
| 22 | <i>Trichosanthes pilosa</i>         | Cucurbitaceae | 23 | <i>Pilea microphylla</i>         | Urticaceae    |
| 22 | <i>Trichosanthes quinquangulata</i> | Cucurbitaceae | 23 | <i>Pilea peploides</i>           | Urticaceae    |
| 22 | <i>Trichosanthes tricuspidata</i>   | Cucurbitaceae | 23 | <i>Poikilospermum suaveolens</i> | Urticaceae    |
| 22 | <i>Trichosanthes villosa</i>        | Cucurbitaceae | 23 | <i>Procris frutescens</i>        | Urticaceae    |
| 22 | <i>Zanonia indica</i>               | Cucurbitaceae | 23 | <i>Procris pedunculata</i>       | Urticaceae    |
| 22 | <i>Zehneria mucronata</i>           | Cucurbitaceae | 23 | <i>Urtica bullata</i>            | Urticaceae    |
| 22 | <i>Zehneria nesophila</i>           | Cucurbitaceae |    |                                  |               |

|    |                              |          |
|----|------------------------------|----------|
| 24 | <i>Ficus albipila</i>        | Moraceae |
| 24 | <i>Ficus ampelas</i>         | Moraceae |
| 24 | <i>Ficus carica</i>          | Moraceae |
| 24 | <i>Ficus copiosa</i>         | Moraceae |
| 24 | <i>Ficus cuspidata</i>       | Moraceae |
| 24 | <i>Ficus disticha</i>        | Moraceae |
| 24 | <i>Ficus fulva</i>           | Moraceae |
| 24 | <i>Ficus glandulifera</i>    | Moraceae |
| 24 | <i>Ficus grossularioides</i> | Moraceae |
| 24 | <i>Ficus heterophylla</i>    | Moraceae |
| 24 | <i>Ficus heteropleura</i>    | Moraceae |
| 24 | <i>Ficus hirta</i>           | Moraceae |
| 24 | <i>Ficus lacor</i>           | Moraceae |
| 24 | <i>Ficus melinocarpa</i>     | Moraceae |
| 24 | <i>Ficus opposita</i>        | Moraceae |
| 24 | <i>Ficus padana</i>          | Moraceae |
| 24 | <i>Ficus parietalis</i>      | Moraceae |
| 24 | <i>Ficus pumila</i>          | Moraceae |
| 24 | <i>Ficus punctata</i>        | Moraceae |
| 24 | <i>Ficus religiosa</i>       | Moraceae |
| 24 | <i>Ficus sagittata</i>       | Moraceae |
| 24 | <i>Ficus subulata</i>        | Moraceae |
| 24 | <i>Ficus superba</i>         | Moraceae |
| 24 | <i>Ficus tinctoria</i>       | Moraceae |
| 24 | <i>Ficus trichocarpa</i>     | Moraceae |
| 24 | <i>Ficus villosa</i>         | Moraceae |
| 24 | <i>Ficus virens</i>          | Moraceae |

**Table S4. Seed plant species and families within 'hot clades' of the native-only analysis.**

| <b>Clade</b> | <b>Species</b>                       | <b>Family</b> |   |                                             |
|--------------|--------------------------------------|---------------|---|---------------------------------------------|
| 1            | <i>Dacrycarpus imbricatus</i>        | Podocarpaceae | 3 | <i>Monodora angolensis</i> Annonaceae       |
| 1            | <i>Nageia wallichiana</i>            | Podocarpaceae | 3 | <i>Monodora myristica</i> Annonaceae        |
| 1            | <i>Podocarpus neriifolius</i>        | Podocarpaceae | 3 | <i>Neo-uvaria parallelevenia</i> Annonaceae |
| 1            | <i>Podocarpus rumphii</i>            | Podocarpaceae | 3 | <i>Orophea creaghii</i> Annonaceae          |
| 1            | <i>Sundacarpus amarus</i>            | Podocarpaceae | 3 | <i>Orophea enneandra</i> Annonaceae         |
| 2            | <i>Piper betle</i>                   | Piperaceae    | 3 | <i>Platymitra macrocarpa</i> Annonaceae     |
| 2            | <i>Piper caninum</i>                 | Piperaceae    | 3 | <i>Polyalthia longipes</i> Annonaceae       |
| 2            | <i>Piper cubeba</i>                  | Piperaceae    | 3 | <i>Polyalthia subcordata</i> Annonaceae     |
| 2            | <i>Piper muricatum</i>               | Piperaceae    | 3 | <i>Polyalthia suberosa</i> Annonaceae       |
| 2            | <i>Piper retrofractum</i>            | Piperaceae    | 3 | <i>Popowia pisocarpa</i> Annonaceae         |
| 2            | <i>Piper sarmentosum</i>             | Piperaceae    | 3 | <i>Pseuduvaria latifolia</i> Annonaceae     |
| 2            | <i>Piper umbellatum</i>              | Piperaceae    | 3 | <i>Pseuduvaria reticulata</i> Annonaceae    |
| 2            | <i>Piper wallichii</i>               | Piperaceae    | 3 | <i>Pseuduvaria rugosa</i> Annonaceae        |
| 2            | <i>Zippelia begoniifolia</i>         | Piperaceae    | 3 | <i>Pyramidanthe prismatica</i> Annonaceae   |
| 3            | <i>Alphonsea elliptica</i>           | Annonaceae    | 3 | <i>Rollinia mucosa</i> Annonaceae           |
| 3            | <i>Alphonsea javanica</i>            | Annonaceae    | 3 | <i>Sphaerocoryne affinis</i> Annonaceae     |
| 3            | <i>Artabotrys suaveolens</i>         | Annonaceae    | 3 | <i>Trivalvaria macrophylla</i> Annonaceae   |
| 3            | <i>Cananga odorata</i>               | Annonaceae    | 3 | <i>Uvaria argentea</i> Annonaceae           |
| 3            | <i>Cyathocalyx sumatranus</i>        | Annonaceae    | 3 | <i>Uvaria chamae</i> Annonaceae             |
| 3            | <i>Dasymaschalon blumei</i>          | Annonaceae    | 3 | <i>Uvaria concava</i> Annonaceae            |
| 3            | <i>Dasymaschalon dasymaschalum</i>   | Annonaceae    | 3 | <i>Uvaria grandiflora</i> Annonaceae        |
| 3            | <i>Desmos chinensis</i>              | Annonaceae    | 3 | <i>Uvaria hirsuta</i> Annonaceae            |
| 3            | <i>Friesodielsia biglandulosa</i>    | Annonaceae    | 3 | <i>Uvaria rufa</i> Annonaceae               |
| 3            | <i>Friesodielsia cuneiformis</i>     | Annonaceae    | 4 | <i>Magnolia champaca</i> Magnoliaceae       |
| 3            | <i>Goniothalamus costulatus</i>      | Annonaceae    | 4 | <i>Magnolia montana</i> Magnoliaceae        |
| 3            | <i>Goniothalamus macrophyllus</i>    | Annonaceae    | 4 | <i>Michelia alba</i> Magnoliaceae           |
| 3            | <i>Goniothalamus parallelovenius</i> | Annonaceae    | 5 | <i>Pandanus dubius</i> Pandanaceae          |
| 3            | <i>Maasia glauca</i>                 | Annonaceae    | 5 | <i>Pandanus odorifer</i> Pandanaceae        |
| 3            | <i>Marsypopetalum pallidum</i>       | Annonaceae    | 5 | <i>Pandanus tectorius</i> Pandanaceae       |
| 3            | <i>Meiogyne cylindrocarpa</i>        | Annonaceae    | 6 | <i>Hellenia speciosa</i> Costaceae          |
| 3            | <i>Meiogyne virgata</i>              | Annonaceae    | 6 | <i>Tapeinochilos ananassae</i> Costaceae    |
| 3            | <i>Melodorum fruticosum</i>          | Annonaceae    | 6 | <i>Alpinia mutica</i> Zingiberaceae         |
| 3            | <i>Mezzettia parviflora</i>          | Annonaceae    | 6 | <i>Alpinia scabra</i> Zingiberaceae         |
| 3            | <i>Miliusa horsfieldii</i>           | Annonaceae    | 6 | <i>Amomum aculeatum</i> Zingiberaceae       |
| 3            | <i>Miliusa longipes</i>              | Annonaceae    | 6 | <i>Amomum compactum</i> Zingiberaceae       |
| 3            | <i>Mitrella kentii</i>               | Annonaceae    | 6 | <i>Amomum dealbatum</i> Zingiberaceae       |
| 3            | <i>Mitrephora polypyrena</i>         | Annonaceae    | 6 | <i>Amomum maximum</i> Zingiberaceae         |
|              |                                      |               | 6 | <i>Amomum villosum</i> Zingiberaceae        |
|              |                                      |               | 6 | <i>Boesenbergia curtisii</i> Zingiberaceae  |
|              |                                      |               | 6 | <i>Boesenbergia rotunda</i> Zingiberaceae   |
|              |                                      |               | 6 | <i>Curcuma aeruginosa</i> Zingiberaceae     |
|              |                                      |               | 6 | <i>Curcuma aurantiaca</i> Zingiberaceae     |
|              |                                      |               | 6 | <i>Curcuma colorata</i> Zingiberaceae       |

|    |                                |                |    |                                    |             |
|----|--------------------------------|----------------|----|------------------------------------|-------------|
| 6  | <i>Curcuma heyneana</i>        | Zingiberaceae  | 11 | <i>Blumea crispata</i>             | Asteraceae  |
| 6  | <i>Curcuma longa</i>           | Zingiberaceae  | 11 | <i>Blumea dregeanoides</i>         | Asteraceae  |
| 6  | <i>Curcuma mangga</i>          | Zingiberaceae  | 11 | <i>Blumea lacera</i>               | Asteraceae  |
| 6  | <i>Curcuma montana</i>         | Zingiberaceae  | 11 | <i>Blumea lanceolaria</i>          | Asteraceae  |
| 6  | <i>Curcuma parviflora</i>      | Zingiberaceae  | 11 | <i>Blumea riparia</i>              | Asteraceae  |
| 6  | <i>Curcuma phaeocaulis</i>     | Zingiberaceae  | 11 | <i>Blumea saxatilis</i>            | Asteraceae  |
| 6  | <i>Curcuma purpurascens</i>    | Zingiberaceae  | 11 | <i>Blumea sessiliflora</i>         | Asteraceae  |
| 6  | <i>Curcuma xanthorrhiza</i>    | Zingiberaceae  | 11 | <i>Blumea tenella</i>              | Asteraceae  |
| 6  | <i>Curcuma zedoaria</i>        | Zingiberaceae  | 11 | <i>Carpesium cernuum</i>           | Asteraceae  |
| 6  | <i>Elettaria cardamomum</i>    | Zingiberaceae  | 11 | <i>Centipeda minima</i>            | Asteraceae  |
| 6  | <i>Etlingera elatior</i>       | Zingiberaceae  | 11 | <i>Duhaldea cappa</i>              | Asteraceae  |
| 6  | <i>Etlingera hemisphaerica</i> | Zingiberaceae  | 11 | <i>Euchiton involucratus</i>       | Asteraceae  |
| 6  | <i>Globba marantina</i>        | Zingiberaceae  | 11 | <i>Euchiton japonicus</i>          | Asteraceae  |
| 6  | <i>Hedychium horsfieldii</i>   | Zingiberaceae  | 11 | <i>Gnaphalium polycaulon</i>       | Asteraceae  |
| 6  | <i>Hornstedtia conica</i>      | Zingiberaceae  | 11 | <i>Helichrysum indicum</i>         | Asteraceae  |
| 6  | <i>Hornstedtia leonurus</i>    | Zingiberaceae  | 11 | <i>Mikania cordata</i>             | Asteraceae  |
| 6  | <i>Hornstedtia minor</i>       | Zingiberaceae  | 11 | <i>Pluchea indica</i>              | Asteraceae  |
| 6  | <i>Kaempferia angustifolia</i> | Zingiberaceae  | 11 | <i>Pseudognaphalium luteoalbum</i> | Asteraceae  |
| 6  | <i>Kaempferia rotunda</i>      | Zingiberaceae  | 11 | <i>Pterocaulon sphacelatum</i>     | Asteraceae  |
| 6  | <i>Zingiber gramineum</i>      | Zingiberaceae  | 11 | <i>Sigesbeckia orientalis</i>      | Asteraceae  |
| 6  | <i>Zingiber montanum</i>       | Zingiberaceae  | 11 | <i>Sphaeranthus africanus</i>      | Asteraceae  |
| 6  | <i>Zingiber odoriferum</i>     | Zingiberaceae  | 11 | <i>Sphaeranthus indicus</i>        | Asteraceae  |
| 7  | <i>Anamirta cocculus</i>       | Menispermaceae | 11 | <i>Sphagneticola calendulacea</i>  | Asteraceae  |
| 7  | <i>Arcangelisia flava</i>      | Menispermaceae | 11 | <i>Wedelia asperrima</i>           | Asteraceae  |
| 7  | <i>Coscinium fenestratum</i>   | Menispermaceae | 11 | <i>Wedelia chinensis</i>           | Asteraceae  |
| 7  | <i>Fibraurea tinctoria</i>     | Menispermaceae | 11 | <i>Wollastonia biflora</i>         | Asteraceae  |
| 8  | <i>Persicaria barbata</i>      | Polygonaceae   | 11 | <i>Xanthium strumarium</i>         | Asteraceae  |
| 8  | <i>Persicaria chinensis</i>    | Polygonaceae   | 12 | <i>Adina orientalis</i>            | Rubiaceae   |
| 8  | <i>Persicaria hydropiper</i>   | Polygonaceae   | 12 | <i>Breonia chinensis</i>           | Rubiaceae   |
| 8  | <i>Persicaria lapathifolia</i> | Polygonaceae   | 12 | <i>Guettarda speciosa</i>          | Rubiaceae   |
| 8  | <i>Persicaria longiseta</i>    | Polygonaceae   | 12 | <i>Metadina trichotoma</i>         | Rubiaceae   |
| 8  | <i>Persicaria maculosa</i>     | Polygonaceae   | 12 | <i>Mitragyna diversifolia</i>      | Rubiaceae   |
| 8  | <i>Persicaria minor</i>        | Polygonaceae   | 12 | <i>Nauclea subdita</i>             | Rubiaceae   |
| 8  | <i>Persicaria nepalensis</i>   | Polygonaceae   | 12 | <i>Neolamarckia cadamba</i>        | Rubiaceae   |
| 8  | <i>Persicaria orientalis</i>   | Polygonaceae   | 12 | <i>Timonius timon</i>              | Rubiaceae   |
| 9  | <i>Glinus lotoides</i>         | Molluginaceae  | 12 | <i>Uncaria lanosa</i>              | Rubiaceae   |
| 9  | <i>Glinus oppositifolius</i>   | Molluginaceae  | 13 | <i>Acanthus ebracteatus</i>        | Acanthaceae |
| 9  | <i>Mollugo pentaphylla</i>     | Molluginaceae  | 13 | <i>Acanthus ilicifolius</i>        | Acanthaceae |
| 10 | <i>Alangium chinense</i>       | Cornaceae      | 13 | <i>Avicennia marina</i>            | Acanthaceae |
| 10 | <i>Alangium kurzii</i>         | Cornaceae      | 13 | <i>Barleria prionitis</i>          | Acanthaceae |
| 10 | <i>Alangium villosum</i>       | Cornaceae      | 13 | <i>Hemigraphis reptans</i>         | Acanthaceae |
| 11 | <i>Anaphalis javanica</i>      | Asteraceae     | 13 | <i>Hygrophila ringens</i>          | Acanthaceae |
| 11 | <i>Anaphalis longifolia</i>    | Asteraceae     | 13 | <i>Justicia betonica</i>           | Acanthaceae |
| 11 | <i>Athroisma laciniatum</i>    | Asteraceae     | 13 | <i>Justicia procumbens</i>         | Acanthaceae |
| 11 | <i>Bidens biternata</i>        | Asteraceae     | 13 | <i>Peristrophe hyssopifolia</i>    | Acanthaceae |
| 11 | <i>Bidens tripartita</i>       | Asteraceae     |    |                                    |             |
| 11 | <i>Blumea balsamifera</i>      | Asteraceae     |    |                                    |             |



|    |                                        |                  |    |                                       |           |
|----|----------------------------------------|------------------|----|---------------------------------------|-----------|
| 13 | <i>Strobilanthes<br/>bibracteata</i>   | Acanthaceae      | 14 | <i>Acronychia<br/>pedunculata</i>     | Rutaceae  |
| 13 | <i>Strobilanthes cernua</i>            | Acanthaceae      | 14 | <i>Boenninghausenia<br/>albiflora</i> | Rutaceae  |
| 13 | <i>Strobilanthes repanda</i>           | Acanthaceae      | 14 | <i>Citrus amblycarpa</i>              | Rutaceae  |
| 13 | <i>Dolichandrone<br/>spathacea</i>     | Bignoniaceae     | 14 | <i>Citrus hystrix</i>                 | Rutaceae  |
| 13 | <i>Oroxylum indicum</i>                | Bignoniaceae     | 14 | <i>Citrus limon</i>                   | Rutaceae  |
| 13 | <i>Anisomeles indica</i>               | Lamiaceae        | 14 | <i>Citrus maxima</i>                  | Rutaceae  |
| 13 | <i>Basilicum<br/>polystachyon</i>      | Lamiaceae        | 14 | <i>Citrus nobilis</i>                 | Rutaceae  |
| 13 | <i>Callicarpa lancifolia</i>           | Lamiaceae        | 14 | <i>Citrus reticulata</i>              | Rutaceae  |
| 13 | <i>Callicarpa<br/>pedunculata</i>      | Lamiaceae        | 14 | <i>Clausena excavata</i>              | Rutaceae  |
| 13 | <i>Callicarpa rubella</i>              | Lamiaceae        | 14 | <i>Clausena<br/>harmandiana</i>       | Rutaceae  |
| 13 | <i>Clerodendrum<br/>buchananii</i>     | Lamiaceae        | 14 | <i>Erythrochiton<br/>brasiliensis</i> | Rutaceae  |
| 13 | <i>Clerodendrum<br/>speciosissimum</i> | Lamiaceae        | 14 | <i>Glycosmis<br/>cochinchinensis</i>  | Rutaceae  |
| 13 | <i>Clerodendrum<br/>villosum</i>       | Lamiaceae        | 14 | <i>Glycosmis parviflora</i>           | Rutaceae  |
| 13 | <i>Clinopodium gracile</i>             | Lamiaceae        | 14 | <i>Harrisonia brownii</i>             | Rutaceae  |
| 13 | <i>Cymaria dichotoma</i>               | Lamiaceae        | 14 | <i>Harrisonia perforata</i>           | Rutaceae  |
| 13 | <i>Hyssopus officinalis</i>            | Lamiaceae        | 14 | <i>Lunasia amara</i>                  | Rutaceae  |
| 13 | <i>Isodon coetsa</i>                   | Lamiaceae        | 14 | <i>Melicope denhamii</i>              | Rutaceae  |
| 13 | <i>Leonurus sibiricus</i>              | Lamiaceae        | 14 | <i>Melicope latifolia</i>             | Rutaceae  |
| 13 | <i>Melissa axillaris</i>               | Lamiaceae        | 14 | <i>Melicope lunu-<br/>ankenda</i>     | Rutaceae  |
| 13 | <i>Mentha canadensis</i>               | Lamiaceae        | 14 | <i>Merope angulata</i>                | Rutaceae  |
| 13 | <i>Mentha spicata</i>                  | Lamiaceae        | 14 | <i>Micromelum minutum</i>             | Rutaceae  |
| 13 | <i>Ocimum tenuiflorum</i>              | Lamiaceae        | 14 | <i>Murraya koenigii</i>               | Rutaceae  |
| 13 | <i>Paraphlomis javanica</i>            | Lamiaceae        | 14 | <i>Paramignya trimera</i>             | Rutaceae  |
| 13 | <i>Platostoma hispidum</i>             | Lamiaceae        | 14 | <i>Perryodendron<br/>parviflorum</i>  | Rutaceae  |
| 13 | <i>Pogostemon<br/>auricularius</i>     | Lamiaceae        | 14 | <i>Toddalia asiatica</i>              | Rutaceae  |
| 13 | <i>Pogostemon<br/>heyneanus</i>        | Lamiaceae        | 14 | <i>Zanthoxylum<br/>avicennae</i>      | Rutaceae  |
| 13 | <i>Premna odorata</i>                  | Lamiaceae        | 14 | <i>Zanthoxylum nitidum</i>            | Rutaceae  |
| 13 | <i>Premna serratifolia</i>             | Lamiaceae        | 14 | <i>Zanthoxylum<br/>scandens</i>       | Rutaceae  |
| 13 | <i>Satureja hortensis</i>              | Lamiaceae        | 15 | <i>Abelmoschus crinitus</i>           | Malvaceae |
| 13 | <i>Tectona grandis</i>                 | Lamiaceae        | 15 | <i>Abelmoschus<br/>ficulneus</i>      | Malvaceae |
| 13 | <i>Vitex agnus-castus</i>              | Lamiaceae        | 15 | <i>Abelmoschus<br/>moschatus</i>      | Malvaceae |
| 13 | <i>Vitex negundo</i>                   | Lamiaceae        | 15 | <i>Abutilon indicum</i>               | Malvaceae |
| 13 | <i>Vitex quinata</i>                   | Lamiaceae        | 15 | <i>Abutilon pannosum</i>              | Malvaceae |
| 13 | <i>Vitex trifolia</i>                  | Lamiaceae        | 15 | <i>Abutilon theophrasti</i>           | Malvaceae |
| 13 | <i>Utricularia aurea</i>               | Lentibulariaceae | 15 | <i>Berrya javanica</i>                | Malvaceae |
| 13 | <i>Utricularia caerulea</i>            | Lentibulariaceae | 15 | <i>Cola acuminata</i>                 | Malvaceae |
| 13 | <i>Utricularia foveolata</i>           | Lentibulariaceae | 15 | <i>Commersonia<br/>bartramia</i>      | Malvaceae |
| 13 | <i>Utricularia gibba</i>               | Lentibulariaceae | 15 | <i>Corchorus aestuans</i>             | Malvaceae |
| 13 | <i>Utricularia striatula</i>           | Lentibulariaceae | 15 | <i>Corchorus capsularis</i>           | Malvaceae |
| 13 | <i>Utricularia uliginosa</i>           | Lentibulariaceae | 15 | <i>Corchorus olitorius</i>            | Malvaceae |
| 13 | <i>Mazus pumilus</i>                   | Mazaceae         | 15 | <i>Corchorus trilocularis</i>         | Malvaceae |
| 13 | <i>Micrargeria filiformis</i>          | Orobanchaceae    | 15 | <i>Durio zibethinus</i>               | Malvaceae |
| 13 | <i>Striga asiatica</i>                 | Orobanchaceae    |    |                                       |           |
| 13 | <i>Buddleja asiatica</i>               | Scrophulariaceae |    |                                       |           |
| 13 | <i>Phyla nodiflora</i>                 | Verbenaceae      |    |                                       |           |

|    |                                  |           |    |                                    |                |
|----|----------------------------------|-----------|----|------------------------------------|----------------|
| 15 | <i>Gossypium herbaceum</i>       | Malvaceae | 16 | <i>Paraserianthes lophantha</i>    | Fabaceae       |
| 15 | <i>Helicteres angustifolia</i>   | Malvaceae | 16 | <i>Parkia speciosa</i>             | Fabaceae       |
| 15 | <i>Heritiera littoralis</i>      | Malvaceae | 16 | <i>Parkia timoriana</i>            | Fabaceae       |
| 15 | <i>Hibiscus acetosella</i>       | Malvaceae | 16 | <i>Peltophorum pterocarpum</i>     | Fabaceae       |
| 15 | <i>Hibiscus surattensis</i>      | Malvaceae | 16 | <i>Senegalia pennata</i>           | Fabaceae       |
| 15 | <i>Hibiscus vitifolius</i>       | Malvaceae | 16 | <i>Senna italica</i>               | Fabaceae       |
| 15 | <i>Kleinhovia hospita</i>        | Malvaceae | 16 | <i>Senna sophora</i>               | Fabaceae       |
| 15 | <i>Melochia corchorifolia</i>    | Malvaceae | 16 | <i>Senna sulfurea</i>              | Fabaceae       |
| 15 | <i>Microcos paniculata</i>       | Malvaceae | 16 | <i>Vachellia leucophloea</i>       | Fabaceae       |
| 15 | <i>Pentace polyantha</i>         | Malvaceae | 16 | <i>Zapoteca tetragona</i>          | Fabaceae       |
| 15 | <i>Pterospermum acerifolium</i>  | Malvaceae | 17 | <i>Canavalia cathartica</i>        | Fabaceae       |
| 15 | <i>Reevesia thyrsoides</i>       | Malvaceae | 17 | <i>Canavalia gladiata</i>          | Fabaceae       |
| 15 | <i>Schoutenia glomerata</i>      | Malvaceae | 17 | <i>Canavalia rosea</i>             | Fabaceae       |
| 15 | <i>Sida acuta</i>                | Malvaceae | 18 | <i>Dolichos trilobus</i>           | Fabaceae       |
| 15 | <i>Sida alnifolia</i>            | Malvaceae | 18 | <i>Psophocarpus tetragonolobus</i> | Fabaceae       |
| 15 | <i>Sida cordata</i>              | Malvaceae | 18 | <i>Strongylodon macrobotrys</i>    | Fabaceae       |
| 15 | <i>Sida cordifolia</i>           | Malvaceae | 18 | <i>Vigna mungo</i>                 | Fabaceae       |
| 15 | <i>Sida mysorensis</i>           | Malvaceae | 18 | <i>Vigna radiata</i>               | Fabaceae       |
| 15 | <i>Sida spinosa</i>              | Malvaceae | 18 | <i>Vigna unguiculata</i>           | Fabaceae       |
| 15 | <i>Sterculia coccinea</i>        | Malvaceae | 19 | <i>Garcinia celebica</i>           | Clusiaceae     |
| 15 | <i>Sterculia cordata</i>         | Malvaceae | 19 | <i>Garcinia dulcis</i>             | Clusiaceae     |
| 15 | <i>Talipariti tiliaceum</i>      | Malvaceae | 19 | <i>Garcinia nervosa</i>            | Clusiaceae     |
| 15 | <i>Thespesia lampas</i>          | Malvaceae | 19 | <i>Garcinia parvifolia</i>         | Clusiaceae     |
| 15 | <i>Thespesia populnea</i>        | Malvaceae | 19 | <i>Garcinia rostrata</i>           | Clusiaceae     |
| 15 | <i>Triumfetta rhomboidea</i>     | Malvaceae | 19 | <i>Pentadesma butyracea</i>        | Clusiaceae     |
| 15 | <i>Urena lobata</i>              | Malvaceae | 20 | <i>Breynia cernua</i>              | Phyllanthaceae |
| 16 | <i>Acrocarpus fraxinifolius</i>  | Fabaceae  | 20 | <i>Flueggea virosa</i>             | Phyllanthaceae |
| 16 | <i>Adenanthera microsperma</i>   | Fabaceae  | 20 | <i>Glochidion philippicum</i>      | Phyllanthaceae |
| 16 | <i>Adenanthera pavonina</i>      | Fabaceae  | 20 | <i>Glochidion rubrum</i>           | Phyllanthaceae |
| 16 | <i>Albizia chinensis</i>         | Fabaceae  | 20 | <i>Glochidion zeylanicum</i>       | Phyllanthaceae |
| 16 | <i>Albizia lebeck</i>            | Fabaceae  | 20 | <i>Margaritaria indica</i>         | Phyllanthaceae |
| 16 | <i>Albizia procera</i>           | Fabaceae  | 20 | <i>Phyllanthus acutissimus</i>     | Phyllanthaceae |
| 16 | <i>Archidendron clypearia</i>    | Fabaceae  | 20 | <i>Phyllanthus emblica</i>         | Phyllanthaceae |
| 16 | <i>Caesalpinia digyna</i>        | Fabaceae  | 20 | <i>Phyllanthus gracilipes</i>      | Phyllanthaceae |
| 16 | <i>Caesalpinia globulorum</i>    | Fabaceae  | 20 | <i>Phyllanthus maderaspatensis</i> | Phyllanthaceae |
| 16 | <i>Calliandra calothyrsus</i>    | Fabaceae  | 20 | <i>Phyllanthus microcarpus</i>     | Phyllanthaceae |
| 16 | <i>Cassia javanica</i>           | Fabaceae  | 20 | <i>Phyllanthus niruri</i>          | Phyllanthaceae |
| 16 | <i>Cathormion umbellatum</i>     | Fabaceae  | 20 | <i>Phyllanthus reticulatus</i>     | Phyllanthaceae |
| 16 | <i>Chamaecrista absus</i>        | Fabaceae  | 20 | <i>Phyllanthus urinaria</i>        | Phyllanthaceae |
| 16 | <i>Dichrostachys cinerea</i>     | Fabaceae  |    |                                    |                |
| 16 | <i>Entada gigas</i>              | Fabaceae  |    |                                    |                |
| 16 | <i>Entada phaseoloides</i>       | Fabaceae  |    |                                    |                |
| 16 | <i>Pararchidendron pruinosum</i> | Fabaceae  |    |                                    |                |

**Table S5. Seed plant species and families within 'cold clades' of the native-only analysis.**

| <b>Clade</b> | <b>Species</b>                        | <b>Family</b> |   |                                    |             |
|--------------|---------------------------------------|---------------|---|------------------------------------|-------------|
| 1            | <i>Aerides odorata</i>                | Orchidaceae   | 1 | <i>Crepidium oculatum</i>          | Orchidaceae |
| 1            | <i>Aerides quinquevulnera</i>         | Orchidaceae   | 1 | <i>Crepidium perakense</i>         | Orchidaceae |
| 1            | <i>Agrostophyllum majus</i>           | Orchidaceae   | 1 | <i>Cymbidium bicolor</i>           | Orchidaceae |
| 1            | <i>Agrostophyllum stipulatum</i>      | Orchidaceae   | 1 | <i>Cymbidium ensifolium</i>        | Orchidaceae |
| 1            | <i>Anoectochilus roxburghii</i>       | Orchidaceae   | 1 | <i>Cymbidium lancifolium</i>       | Orchidaceae |
| 1            | <i>Appendicula cornuta</i>            | Orchidaceae   | 1 | <i>Cystorchis aphylla</i>          | Orchidaceae |
| 1            | <i>Arachnis flos-aeris</i>            | Orchidaceae   | 1 | <i>Dendrobium aloifolium</i>       | Orchidaceae |
| 1            | <i>Arundina graminifolia</i>          | Orchidaceae   | 1 | <i>Dendrobium atavus</i>           | Orchidaceae |
| 1            | <i>Ascochilus emarginatus</i>         | Orchidaceae   | 1 | <i>Dendrobium aureilobum</i>       | Orchidaceae |
| 1            | <i>Bogoria raciborskii</i>            | Orchidaceae   | 1 | <i>Dendrobium crumenatum</i>       | Orchidaceae |
| 1            | <i>Bulbophyllum angustifolium</i>     | Orchidaceae   | 1 | <i>Dendrobium hasseltii</i>        | Orchidaceae |
| 1            | <i>Bulbophyllum bakhuizenii</i>       | Orchidaceae   | 1 | <i>Dendrobium heterocarpum</i>     | Orchidaceae |
| 1            | <i>Bulbophyllum clandestinum</i>      | Orchidaceae   | 1 | <i>Dendrobium hymenophyllum</i>    | Orchidaceae |
| 1            | <i>Bulbophyllum coniferum</i>         | Orchidaceae   | 1 | <i>Dendrobium jacobsonii</i>       | Orchidaceae |
| 1            | <i>Bulbophyllum flabellum-veneris</i> | Orchidaceae   | 1 | <i>Dendrobium lindleyi</i>         | Orchidaceae |
| 1            | <i>Bulbophyllum lobbii</i>            | Orchidaceae   | 1 | <i>Dendrobium macrostachyum</i>    | Orchidaceae |
| 1            | <i>Bulbophyllum macranthum</i>        | Orchidaceae   | 1 | <i>Dendrobium mutabile</i>         | Orchidaceae |
| 1            | <i>Bulbophyllum membranaceum</i>      | Orchidaceae   | 1 | <i>Dendrobium pachyphyllum</i>     | Orchidaceae |
| 1            | <i>Bulbophyllum mutabile</i>          | Orchidaceae   | 1 | <i>Dendrobium plicatile</i>        | Orchidaceae |
| 1            | <i>Bulbophyllum obtusum</i>           | Orchidaceae   | 1 | <i>Dendrobium prianganense</i>     | Orchidaceae |
| 1            | <i>Bulbophyllum ovalifolium</i>       | Orchidaceae   | 1 | <i>Dendrobium salaccense</i>       | Orchidaceae |
| 1            | <i>Bulbophyllum purpurascens</i>      | Orchidaceae   | 1 | <i>Dendrobium secundum</i>         | Orchidaceae |
| 1            | <i>Bulbophyllum sulcatum</i>          | Orchidaceae   | 1 | <i>Dendrobium stuposum</i>         | Orchidaceae |
| 1            | <i>Bulbophyllum uniflorum</i>         | Orchidaceae   | 1 | <i>Dendrobium subulatum</i>        | Orchidaceae |
| 1            | <i>Bulbophyllum vaginatum</i>         | Orchidaceae   | 1 | <i>Dendrobium truncatum</i>        | Orchidaceae |
| 1            | <i>Caladenia carnea</i>               | Orchidaceae   | 1 | <i>Dendrochilum pallidiflavens</i> | Orchidaceae |
| 1            | <i>Caladenia catenata</i>             | Orchidaceae   | 1 | <i>Erythrodes blumei</i>           | Orchidaceae |
| 1            | <i>Calanthe angustifolia</i>          | Orchidaceae   | 1 | <i>Erythrodes latifolia</i>        | Orchidaceae |
| 1            | <i>Calanthe triplicata</i>            | Orchidaceae   | 1 | <i>Erythrorchis altissima</i>      | Orchidaceae |
| 1            | <i>Callostylis rigida</i>             | Orchidaceae   | 1 | <i>Eulophia spectabilis</i>        | Orchidaceae |
| 1            | <i>Ceratochilus biglandulosus</i>     | Orchidaceae   | 1 | <i>Eulophia zollingeri</i>         | Orchidaceae |
| 1            | <i>Chrysoglossum ornatum</i>          | Orchidaceae   | 1 | <i>Flickingeria angustifolia</i>   | Orchidaceae |
| 1            | <i>Cleisostoma subulatum</i>          | Orchidaceae   | 1 | <i>Gastrochilus calceolaris</i>    | Orchidaceae |
| 1            | <i>Cleisostoma williamsonii</i>       | Orchidaceae   | 1 | <i>Goodyera fumata</i>             | Orchidaceae |
| 1            | <i>Coelogyne flexuosa</i>             | Orchidaceae   | 1 | <i>Goodyera procera</i>            | Orchidaceae |
| 1            | <i>Coelogyne mayeriana</i>            | Orchidaceae   | 1 | <i>Goodyera pusilla</i>            | Orchidaceae |
| 1            | <i>Coelogyne ovalis</i>               | Orchidaceae   | 1 | <i>Goodyera rubicunda</i>          | Orchidaceae |
| 1            | <i>Collabium simplex</i>              | Orchidaceae   | 1 | <i>Goodyera viridiflora</i>        | Orchidaceae |
| 1            | <i>Corybas carinatus</i>              | Orchidaceae   | 1 | <i>Grammatophyllum speciosum</i>   | Orchidaceae |
| 1            | <i>Corymborkis veratrifolia</i>       | Orchidaceae   | 1 | <i>Grosourdyia appendiculata</i>   | Orchidaceae |
| 1            | <i>Crepidium acuminatum</i>           | Orchidaceae   | 1 | <i>Herminium lanceum</i>           | Orchidaceae |
|              |                                       |               | 1 | <i>Hetaeria oblongifolia</i>       | Orchidaceae |

|   |                                |             |   |                                  |             |
|---|--------------------------------|-------------|---|----------------------------------|-------------|
| 1 | <i>Hylophila lanceolata</i>    | Orchidaceae | 1 | <i>Schoenorchis paniculata</i>   | Orchidaceae |
| 1 | <i>Hymenorchis javanica</i>    | Orchidaceae | 1 | <i>Spathoglottis aurea</i>       | Orchidaceae |
| 1 | <i>Lepidogyne longifolia</i>   | Orchidaceae | 1 | <i>Spathoglottis kimballiana</i> | Orchidaceae |
| 1 | <i>Liparis bootanensis</i>     | Orchidaceae | 1 | <i>Spathoglottis plicata</i>     | Orchidaceae |
| 1 | <i>Liparis condylobulbon</i>   | Orchidaceae | 1 | <i>Specklinia lanceola</i>       | Orchidaceae |
| 1 | <i>Liparis elliptica</i>       | Orchidaceae | 1 | <i>Spiranthes sinensis</i>       | Orchidaceae |
| 1 | <i>Liparis latifolia</i>       | Orchidaceae | 1 | <i>Stichorkis disticha</i>       | Orchidaceae |
| 1 | <i>Liparis montana</i>         | Orchidaceae | 1 | <i>Stichorkis gibbosa</i>        | Orchidaceae |
| 1 | <i>Liparis odorata</i>         | Orchidaceae | 1 | <i>Tainia latifolia</i>          | Orchidaceae |
| 1 | <i>Liparis parviflora</i>      | Orchidaceae | 1 | <i>Thrixspermum</i>              | Orchidaceae |
| 1 | <i>Liparis rheedei</i>         | Orchidaceae |   | <i>amplexicaule</i>              |             |
| 1 | <i>Liparis viridiflora</i>     | Orchidaceae | 1 | <i>Thrixspermum centipeda</i>    | Orchidaceae |
| 1 | <i>Luisia tristis</i>          | Orchidaceae | 1 | <i>Trichotosia ferox</i>         | Orchidaceae |
| 1 | <i>Malleola baliensis</i>      | Orchidaceae | 1 | <i>Vanda helvola</i>             | Orchidaceae |
| 1 | <i>Micropera pallida</i>       | Orchidaceae | 1 | <i>Vanda tricolor</i>            | Orchidaceae |
| 1 | <i>Microsaccus griffithii</i>  | Orchidaceae | 1 | <i>Vanilla albida</i>            | Orchidaceae |
| 1 | <i>Nephelaphyllum</i>          | Orchidaceae | 1 | <i>Vanilla aphylla</i>           | Orchidaceae |
|   | <i>pulchrum</i>                |             | 1 | <i>Zeuxine gracilis</i>          | Orchidaceae |
| 1 | <i>Nephelaphyllum</i>          | Orchidaceae | 1 | <i>Zeuxine strateumatica</i>     | Orchidaceae |
|   | <i>tenuiflorum</i>             |             | 2 | <i>Abildgaardia ovata</i>        | Cyperaceae  |
| 1 | <i>Nervilia concolor</i>       | Orchidaceae | 2 | <i>Actinoscirpus grossus</i>     | Cyperaceae  |
| 1 | <i>Nervilia plicata</i>        | Orchidaceae | 2 | <i>Bulbostylis barbata</i>       | Cyperaceae  |
| 1 | <i>Oberonia ensiformis</i>     | Orchidaceae | 2 | <i>Bulbostylis densa</i>         | Cyperaceae  |
| 1 | <i>Oberonia padangensis</i>    | Orchidaceae | 2 | <i>Carex baccans</i>             | Cyperaceae  |
| 1 | <i>Oberonia prainiana</i>      | Orchidaceae | 2 | <i>Carex breviscapa</i>          | Cyperaceae  |
| 1 | <i>Oeceoclades pulchra</i>     | Orchidaceae | 2 | <i>Carex brunnea</i>             | Cyperaceae  |
| 1 | <i>Paphiopedilum</i>           | Orchidaceae | 2 | <i>Carex capillacea</i>          | Cyperaceae  |
|   | <i>javanicum</i>               |             | 2 | <i>Carex cruciata</i>            | Cyperaceae  |
| 1 | <i>Paphiopedilum</i>           | Orchidaceae | 2 | <i>Carex cryptostachys</i>       | Cyperaceae  |
|   | <i>venustum</i>                |             | 2 | <i>Carex divulsa</i>             | Cyperaceae  |
| 1 | <i>Peristylus tentaculatus</i> | Orchidaceae | 2 | <i>Carex doniana</i>             | Cyperaceae  |
| 1 | <i>Phaius flavus</i>           | Orchidaceae | 2 | <i>Carex filicina</i>            | Cyperaceae  |
| 1 | <i>Phaius mishmensis</i>       | Orchidaceae | 2 | <i>Carex japonica</i>            | Cyperaceae  |
| 1 | <i>Phalaenopsis comu-</i>      | Orchidaceae | 2 | <i>Carex muricata</i>            | Cyperaceae  |
|   | <i>cervi</i>                   |             | 2 | <i>Carex myosurus</i>            | Cyperaceae  |
| 1 | <i>Phalaenopsis deliciosa</i>  | Orchidaceae | 2 | <i>Carex nigra</i>               | Cyperaceae  |
| 1 | <i>Phalaenopsis fimbriata</i>  | Orchidaceae | 2 | <i>Carex phacota</i>             | Cyperaceae  |
| 1 | <i>Phalaenopsis javanica</i>   | Orchidaceae | 2 | <i>Carex pruinosa</i>            | Cyperaceae  |
| 1 | <i>Phalaenopsis kunstleri</i>  | Orchidaceae | 2 | <i>Carex pseudocyperus</i>       | Cyperaceae  |
| 1 | <i>Pholidota articulata</i>    | Orchidaceae | 2 | <i>Carex remota</i>              | Cyperaceae  |
| 1 | <i>Pholidota imbricata</i>     | Orchidaceae | 2 | <i>Carex speciosa</i>            | Cyperaceae  |
| 1 | <i>Phyllorchis flavescens</i>  | Orchidaceae | 2 | <i>Carex stramentitia</i>        | Cyperaceae  |
| 1 | <i>Platanthera angustata</i>   | Orchidaceae | 2 | <i>Carex teinogyna</i>           | Cyperaceae  |
| 1 | <i>Polystachya concreta</i>    | Orchidaceae | 2 | <i>Cyperus compressus</i>        | Cyperaceae  |
| 1 | <i>Pomatocalpa diffusum</i>    | Orchidaceae | 2 | <i>Cyperus cuspidatus</i>        | Cyperaceae  |
| 1 | <i>Pomatocalpa kunstleri</i>   | Orchidaceae | 2 | <i>Cyperus cyperoides</i>        | Cyperaceae  |
| 1 | <i>Pomatocalpa spicatum</i>    | Orchidaceae | 2 | <i>Cyperus difformis</i>         | Cyperaceae  |
| 1 | <i>Rhomboda cristata</i>       | Orchidaceae | 2 | <i>Cyperus exaltatus</i>         | Cyperaceae  |
| 1 | <i>Robiquetia spathulata</i>   | Orchidaceae | 2 | <i>Cyperus giganteus</i>         | Cyperaceae  |
| 1 | <i>Saccolabium pusillum</i>    | Orchidaceae | 2 | <i>Cyperus imbricatus</i>        | Cyperaceae  |
| 1 | <i>Sarcoglyphis comberi</i>    | Orchidaceae | 2 | <i>Cyperus odoratus</i>          | Cyperaceae  |
| 1 | <i>Schoenorchis micrantha</i>  | Orchidaceae |   |                                  |             |

|   |                                  |            |   |                               |         |
|---|----------------------------------|------------|---|-------------------------------|---------|
| 2 | <i>Cyperus pilosus</i>           | Cyperaceae | 3 | <i>Centotheca lappacea</i>    | Poaceae |
| 2 | <i>Cyperus squarrosus</i>        | Cyperaceae | 3 | <i>Chimonobambusa</i>         | Poaceae |
| 2 | <i>Cyperus strigosus</i>         | Cyperaceae |   | <i>quadrangularis</i>         |         |
| 2 | <i>Diplacrum caricinum</i>       | Cyperaceae | 3 | <i>Chionachne gigantea</i>    | Poaceae |
| 2 | <i>Eleocharis congesta</i>       | Cyperaceae | 3 | <i>Chloris barbata</i>        | Poaceae |
| 2 | <i>Eleocharis dulcis</i>         | Cyperaceae | 3 | <i>Chloris virgata</i>        | Poaceae |
| 2 | <i>Fimbristylis aestivalis</i>   | Cyperaceae | 3 | <i>Chrysopogon</i>            | Poaceae |
| 2 | <i>Fimbristylis complanata</i>   | Cyperaceae |   | <i>zizanioides</i>            |         |
| 2 | <i>Fimbristylis cymosa</i>       | Cyperaceae | 3 | <i>Coix lacryma-jobi</i>      | Poaceae |
| 2 | <i>Fimbristylis dichotoma</i>    | Cyperaceae | 3 | <i>Cynodon dactylon</i>       | Poaceae |
| 2 | <i>Fimbristylis ferruginea</i>   | Cyperaceae | 3 | <i>Cynodon radiatus</i>       | Poaceae |
| 2 | <i>Fimbristylis littoralis</i>   | Cyperaceae | 3 | <i>Cyrtococcum patens</i>     | Poaceae |
| 2 | <i>Fimbristylis squarrosa</i>    | Cyperaceae | 3 | <i>Cyrtococcum trigonum</i>   | Poaceae |
| 2 | <i>Fuirena umbellata</i>         | Cyperaceae | 3 | <i>Dactyloctenium</i>         | Poaceae |
| 2 | <i>Hypolytrum nemorum</i>        | Cyperaceae |   | <i>aegyptium</i>              |         |
| 2 | <i>Isolepis fluitans</i>         | Cyperaceae | 3 | <i>Dendrocalamus asper</i>    | Poaceae |
| 2 | <i>Kyllinga brevifolia</i>       | Cyperaceae | 3 | <i>Dichanthium aristatum</i>  | Poaceae |
| 2 | <i>Kyllinga odorata</i>          | Cyperaceae | 3 | <i>Digitaria abyssinica</i>   | Poaceae |
| 2 | <i>Lipocarpha</i>                | Cyperaceae | 3 | <i>Digitaria bicornis</i>     | Poaceae |
|   | <i>microcephala</i>              |            | 3 | <i>Digitaria fuscescens</i>   | Poaceae |
| 2 | <i>Machaerina rubiginosa</i>     | Cyperaceae | 3 | <i>Digitaria longiflora</i>   | Poaceae |
| 2 | <i>Mapania cuspidata</i>         | Cyperaceae | 3 | <i>Digitaria radicata</i>     | Poaceae |
| 2 | <i>Pycneus flavidus</i>          | Cyperaceae | 3 | <i>Digitaria sanguinalis</i>  | Poaceae |
| 2 | <i>Pycneus polystachyos</i>      | Cyperaceae | 3 | <i>Digitaria violascens</i>   | Poaceae |
| 2 | <i>Queenslandiella hyalina</i>   | Cyperaceae | 3 | <i>Ehrharta stipoides</i>     | Poaceae |
| 2 | <i>Remirea maritima</i>          | Cyperaceae | 3 | <i>Eleusine coracana</i>      | Poaceae |
| 2 | <i>Rhynchospora rubra</i>        | Cyperaceae | 3 | <i>Enteropogon</i>            | Poaceae |
| 2 | <i>Schoenoplectiella</i>         | Cyperaceae |   | <i>dolichostachyus</i>        |         |
|   | <i>mucronata</i>                 |            | 3 | <i>Eragrostis cilianensis</i> | Poaceae |
| 2 | <i>Schoenoplectus littoralis</i> | Cyperaceae | 3 | <i>Eragrostis curvula</i>     | Poaceae |
| 2 | <i>Scirpodendron ghaeri</i>      | Cyperaceae | 3 | <i>Eragrostis japonica</i>    | Poaceae |
| 2 | <i>Scleria lithosperma</i>       | Cyperaceae | 3 | <i>Eragrostis minor</i>       | Poaceae |
| 2 | <i>Scleria terrestris</i>        | Cyperaceae | 3 | <i>Eragrostis multicaulis</i> | Poaceae |
| 2 | <i>Juncus effusus</i>            | Juncaceae  | 3 | <i>Eragrostis nutans</i>      | Poaceae |
| 2 | <i>Juncus inflexus</i>           | Juncaceae  | 3 | <i>Eragrostis pilosa</i>      | Poaceae |
| 3 | <i>Acroceras tonkinense</i>      | Poaceae    | 3 | <i>Eragrostis tenella</i>     | Poaceae |
| 3 | <i>Alloteropsis cimicina</i>     | Poaceae    | 3 | <i>Eriochloa polystachya</i>  | Poaceae |
| 3 | <i>Apluda mutica</i>             | Poaceae    | 3 | <i>Eriochloa punctata</i>     | Poaceae |
| 3 | <i>Arthraxon hispidus</i>        | Poaceae    | 3 | <i>Gigantochloa</i>           | Poaceae |
| 3 | <i>Arundinella purpurea</i>      | Poaceae    |   | <i>atroviolacea</i>           |         |
| 3 | <i>Astrebla lappacea</i>         | Poaceae    | 3 | <i>Gigantochloa atter</i>     | Poaceae |
| 3 | <i>Avena sativa</i>              | Poaceae    | 3 | <i>Holcus lanatus</i>         | Poaceae |
| 3 | <i>Bambusa blumeana</i>          | Poaceae    | 3 | <i>Hymenachne</i>             | Poaceae |
| 3 | <i>Bothriochloa bladhii</i>      | Poaceae    |   | <i>amplexicaulis</i>          |         |
| 3 | <i>Brachiaria brizantha</i>      | Poaceae    | 3 | <i>Ichnanthus pallens</i>     | Poaceae |
| 3 | <i>Brachyachne tenella</i>       | Poaceae    | 3 | <i>Isachne albens</i>         | Poaceae |
| 3 | <i>Brachypodium</i>              | Poaceae    | 3 | <i>Isachne globosa</i>        | Poaceae |
|   | <i>sylvaticum</i>                |            | 3 | <i>Ischaemum</i>              | Poaceae |
| 3 | <i>Capillipedium assimile</i>    | Poaceae    |   | <i>anthephoroides</i>         |         |
| 3 | <i>Capillipedium</i>             | Poaceae    | 3 | <i>Ischaemum barbatum</i>     | Poaceae |
|   | <i>parviflorum</i>               |            | 3 | <i>Ischaemum rugosum</i>      | Poaceae |
| 3 | <i>Cenchrus brownii</i>          | Poaceae    | 3 | <i>Lagurus ovatus</i>         | Poaceae |
|   |                                  |            | 3 | <i>Leptaspis zeylanica</i>    | Poaceae |

|   |                                    |         |   |                                       |            |
|---|------------------------------------|---------|---|---------------------------------------|------------|
| 3 | <i>Leptochloa fusca</i>            | Poaceae | 3 | <i>Tripogon filiformis</i>            | Poaceae    |
| 3 | <i>Lepturus repens</i>             | Poaceae | 3 | <i>Tripsacum dactyloides</i>          | Poaceae    |
| 3 | <i>Lophatherum gracile</i>         | Poaceae | 3 | <i>Urochloa glumaris</i>              | Poaceae    |
| 3 | <i>Microchloa indica</i>           | Poaceae | 3 | <i>Zizania latifolia</i>              | Poaceae    |
| 3 | <i>Muhlenbergia huegelii</i>       | Poaceae | 3 | <i>Zoysia matrella</i>                | Poaceae    |
| 3 | <i>Neyraudia reynaudiana</i>       | Poaceae | 4 | <i>Arenga obtusifolia</i>             | Arecaceae  |
| 3 | <i>Ophiuros exaltatus</i>          | Poaceae | 4 | <i>Arenga pinnata</i>                 | Arecaceae  |
| 3 | <i>Oplismenus burmannii</i>        | Poaceae | 4 | <i>Arenga porphyrocarpa</i>           | Arecaceae  |
| 3 | <i>Oplismenus compositus</i>       | Poaceae | 4 | <i>Arenga undulatifolia</i>           | Arecaceae  |
| 3 | <i>Oplismenus undulatifolius</i>   | Poaceae | 4 | <i>Arenga westerhoutii</i>            | Arecaceae  |
| 3 | <i>Oryza meyeriana</i>             | Poaceae | 4 | <i>Astrocaryum aculeatum</i>          | Arecaceae  |
| 3 | <i>Oryza minuta</i>                | Poaceae | 4 | <i>Astrocaryum malybo</i>             | Arecaceae  |
| 3 | <i>Oryza officinalis</i>           | Poaceae | 4 | <i>Calamus ornatus</i>                | Arecaceae  |
| 3 | <i>Ottochloa nodosa</i>            | Poaceae | 4 | <i>Calamus unifarius</i>              | Arecaceae  |
| 3 | <i>Panicum auritum</i>             | Poaceae | 4 | <i>Calamus viminalis</i>              | Arecaceae  |
| 3 | <i>Panicum sumatrense</i>          | Poaceae | 4 | <i>Caryota maxima</i>                 | Arecaceae  |
| 3 | <i>Panicum trichoides</i>          | Poaceae | 4 | <i>Caryota mitis</i>                  | Arecaceae  |
| 3 | <i>Paspalidium geminatum</i>       | Poaceae | 4 | <i>Caryota rumphiana</i>              | Arecaceae  |
| 3 | <i>Paspalum vaginatum</i>          | Poaceae | 4 | <i>Caryota urens</i>                  | Arecaceae  |
| 3 | <i>Pogonatherum crinitum</i>       | Poaceae | 4 | <i>Ceratolobus concolor</i>           | Arecaceae  |
| 3 | <i>Pseudoraphis spinescens</i>     | Poaceae | 4 | <i>Ceratolobus pseudoconcolor</i>     | Arecaceae  |
| 3 | <i>Rottboellia cochinchinensis</i> | Poaceae | 4 | <i>Corypha taliera</i>                | Arecaceae  |
| 3 | <i>Rytidosperma oreoboloides</i>   | Poaceae | 4 | <i>Corypha utan</i>                   | Arecaceae  |
| 3 | <i>Rytidosperma penicillatum</i>   | Poaceae | 4 | <i>Licuala spinosa</i>                | Arecaceae  |
| 3 | <i>Rytidosperma pilosum</i>        | Poaceae | 4 | <i>Livistona australis</i>            | Arecaceae  |
| 3 | <i>Schizachyrium brevifolium</i>   | Poaceae | 4 | <i>Livistona saribus</i>              | Arecaceae  |
| 3 | <i>Schizostachyum zollingeri</i>   | Poaceae | 4 | <i>Nenga pumila</i>                   | Arecaceae  |
| 3 | <i>Secale cereale</i>              | Poaceae | 4 | <i>Nypa fruticans</i>                 | Arecaceae  |
| 3 | <i>Sehima nervosum</i>             | Poaceae | 4 | <i>Oncosperma tigillarum</i>          | Arecaceae  |
| 3 | <i>Setaria barbata</i>             | Poaceae | 4 | <i>Pinanga coronata</i>               | Arecaceae  |
| 3 | <i>Setaria palmifolia</i>          | Poaceae | 4 | <i>Plectocomia elongata</i>           | Arecaceae  |
| 3 | <i>Setaria parviflora</i>          | Poaceae | 4 | <i>Plectocomiopsis geminiflora</i>    | Arecaceae  |
| 3 | <i>Setaria pumila</i>              | Poaceae | 4 | <i>Salacca zalacca</i>                | Arecaceae  |
| 3 | <i>Setaria verticillata</i>        | Poaceae | 4 | <i>Saribus rotundifolius</i>          | Arecaceae  |
| 3 | <i>Sorghum halepense</i>           | Poaceae | 5 | <i>Oenanthe javanica</i>              | Apiaceae   |
| 3 | <i>Sorghum nitidum</i>             | Poaceae | 5 | <i>Sanicula elata</i>                 | Apiaceae   |
| 3 | <i>Sorghum propinquum</i>          | Poaceae | 5 | <i>Aralia dasyphylla</i>              | Araliaceae |
| 3 | <i>Spinifex littoreus</i>          | Poaceae | 5 | <i>Boerlagiodendron novoguineense</i> | Araliaceae |
| 3 | <i>Sporobolus fertilis</i>         | Poaceae | 5 | <i>Brassaiopsis glomerulata</i>       | Araliaceae |
| 3 | <i>Sporobolus indicus</i>          | Poaceae | 5 | <i>Harmsiopanax aculeatus</i>         | Araliaceae |
| 3 | <i>Sporobolus virginicus</i>       | Poaceae | 5 | <i>Hydrocotyle javanica</i>           | Araliaceae |
| 3 | <i>Themeda triandra</i>            | Poaceae | 5 | <i>Macropanax dispersum</i>           | Araliaceae |
| 3 | <i>Thuarea involuta</i>            | Poaceae | 5 | <i>Macropanax undulatus</i>           | Araliaceae |
| 3 | <i>Thyrsostachys siamensis</i>     | Poaceae | 5 | <i>Osmoxylon boerlagei</i>            | Araliaceae |
| 3 | <i>Thysanolaena latifolia</i>      | Poaceae | 5 | <i>Polyscias diversifolia</i>         | Araliaceae |
|   |                                    |         | 5 | <i>Polyscias jackiana</i>             | Araliaceae |
|   |                                    |         | 5 | <i>Polyscias javanica</i>             | Araliaceae |
|   |                                    |         | 5 | <i>Polyscias nodosa</i>               | Araliaceae |

|   |                                  |                |   |                                 |            |
|---|----------------------------------|----------------|---|---------------------------------|------------|
| 5 | <i>Schefflera aromatica</i>      | Araliaceae     | 7 | <i>Parthenocissus</i>           | Vitaceae   |
| 5 | <i>Schefflera elliptica</i>      | Araliaceae     |   | <i>heterophylla</i>             |            |
| 5 | <i>Schefflera heterophylla</i>   | Araliaceae     | 7 | <i>Parthenocissus</i>           | Vitaceae   |
| 5 | <i>Schefflera lucescens</i>      | Araliaceae     |   | <i>semicordata</i>              |            |
| 5 | <i>Schefflera polybotrya</i>     | Araliaceae     | 7 | <i>Pterisanthes eriopoda</i>    | Vitaceae   |
| 5 | <i>Schefflera rigida</i>         | Araliaceae     | 7 | <i>Tetrastigma coriaceum</i>    | Vitaceae   |
| 5 | <i>Schefflera rugosa</i>         | Araliaceae     | 7 | <i>Tetrastigma curtisii</i>     | Vitaceae   |
| 5 | <i>Schefflera scandens</i>       | Araliaceae     | 7 | <i>Tetrastigma glabratum</i>    | Vitaceae   |
| 5 | <i>Schefflera subavenis</i>      | Araliaceae     | 7 | <i>Tetrastigma hookeri</i>      | Vitaceae   |
| 5 | <i>Schefflera tomentosa</i>      | Araliaceae     | 7 | <i>Tetrastigma laevigatum</i>   | Vitaceae   |
| 5 | <i>Trevesia burckii</i>          | Araliaceae     | 7 | <i>Tetrastigma papillosum</i>   | Vitaceae   |
| 5 | <i>Trevesia sundaica</i>         | Araliaceae     | 7 | <i>Tetrastigma</i>              | Vitaceae   |
| 5 | <i>Pittosporum ferrugineum</i>   | Pittosporaceae |   | <i>rumicispermum</i>            |            |
| 5 | <i>Pittosporum</i>               | Pittosporaceae | 7 | <i>Vitis flexuosa</i>           | Vitaceae   |
|   | <i>moluccanum</i>                |                | 7 | <i>Vitis tiliifolia</i>         | Vitaceae   |
| 5 | <i>Pittosporum ramiflorum</i>    | Pittosporaceae | 8 | <i>Boehmeria glomerulifera</i>  | Urticaceae |
| 6 | <i>Dischidia hirsuta</i>         | Apocynaceae    | 8 | <i>Boehmeria japonica</i>       | Urticaceae |
| 6 | <i>Heterostemma</i>              | Apocynaceae    | 8 | <i>Boehmeria macrophylla</i>    | Urticaceae |
|   | <i>acuminatum</i>                |                | 8 | <i>Boehmeria nivea</i>          | Urticaceae |
| 6 | <i>Hoya cinnamomifolia</i>       | Apocynaceae    | 8 | <i>Boehmeria pilosiuscula</i>   | Urticaceae |
| 6 | <i>Hoya cumingiana</i>           | Apocynaceae    | 8 | <i>Boehmeria platyphylla</i>    | Urticaceae |
| 6 | <i>Hoya lacunosa</i>             | Apocynaceae    | 8 | <i>Boehmeria zollingeriana</i>  | Urticaceae |
| 6 | <i>Hoya longifolia</i>           | Apocynaceae    | 8 | <i>Chamabainia cuspidata</i>    | Urticaceae |
| 6 | <i>Hoya multiflora</i>           | Apocynaceae    | 8 | <i>Cypholophus</i>              | Urticaceae |
| 6 | <i>Hoya puber</i>                | Apocynaceae    |   | <i>macrocephalus</i>            |            |
| 6 | <i>Hoya rumphii</i>              | Apocynaceae    | 8 | <i>Debregeasia longifolia</i>   | Urticaceae |
| 6 | <i>Hoya vitellina</i>            | Apocynaceae    | 8 | <i>Dendrocnide sinuata</i>      | Urticaceae |
| 6 | <i>Telosma accedens</i>          | Apocynaceae    | 8 | <i>Dendrocnide stimulans</i>    | Urticaceae |
| 7 | <i>Ampelocissus thyrsoiflora</i> | Vitaceae       | 8 | <i>Droguetia iners</i>          | Urticaceae |
| 7 | <i>Cayratia cardiophylla</i>     | Vitaceae       | 8 | <i>Elatostema acuminatum</i>    | Urticaceae |
| 7 | <i>Cayratia geniculata</i>       | Vitaceae       | 8 | <i>Elatostema integrifolium</i> | Urticaceae |
| 7 | <i>Cayratia japonica</i>         | Vitaceae       | 8 | <i>Elatostema</i>               | Urticaceae |
| 7 | <i>Cayratia pedata</i>           | Vitaceae       |   | <i>macrophyllum</i>             |            |
| 7 | <i>Cayratia trifolia</i>         | Vitaceae       | 8 | <i>Elatostema nigrescens</i>    | Urticaceae |
| 7 | <i>Cissus adnata</i>             | Vitaceae       | 8 | <i>Elatostema parvum</i>        | Urticaceae |
| 7 | <i>Cissus assamica</i>           | Vitaceae       | 8 | <i>Elatostema</i>               | Urticaceae |
| 7 | <i>Cissus discolor</i>           | Vitaceae       |   | <i>pedunculatum</i>             |            |
| 7 | <i>Cissus hastata</i>            | Vitaceae       | 8 | <i>Elatostema sinuatum</i>      | Urticaceae |
| 7 | <i>Cissus javana</i>             | Vitaceae       | 8 | <i>Elatostema strigosum</i>     | Urticaceae |
| 7 | <i>Cissus nodosa</i>             | Vitaceae       | 8 | <i>Gonostegia hirta</i>         | Urticaceae |
| 7 | <i>Cissus repanda</i>            | Vitaceae       | 8 | <i>Gonostegia pentandra</i>     | Urticaceae |
| 7 | <i>Cissus repens</i>             | Vitaceae       | 8 | <i>Laportea bulbifera</i>       | Urticaceae |
| 7 | <i>Cissus rostrata</i>           | Vitaceae       | 8 | <i>Laportea interrupta</i>      | Urticaceae |
| 7 | <i>Leea aculeata</i>             | Vitaceae       | 8 | <i>Lecanthus peduncularis</i>   | Urticaceae |
| 7 | <i>Leea aequata</i>              | Vitaceae       | 8 | <i>Leucosyke capitellata</i>    | Urticaceae |
| 7 | <i>Leea angulata</i>             | Vitaceae       | 8 | <i>Maoutia puya</i>             | Urticaceae |
| 7 | <i>Leea guineensis</i>           | Vitaceae       | 8 | <i>Nothocnide repanda</i>       | Urticaceae |
| 7 | <i>Leea indica</i>               | Vitaceae       | 8 | <i>Parietaria debilis</i>       | Urticaceae |
| 7 | <i>Leea rubra</i>                | Vitaceae       | 8 | <i>Pellionia heteroloba</i>     | Urticaceae |
| 7 | <i>Parthenocissus dalzielii</i>  | Vitaceae       | 8 | <i>Pilea glaberrima</i>         | Urticaceae |
|   |                                  |                | 8 | <i>Pilea melastomoides</i>      | Urticaceae |
|   |                                  |                | 8 | <i>Pilea peploides</i>          | Urticaceae |

|   |                                  |               |
|---|----------------------------------|---------------|
| 8 | <i>Poikilospermum suaveolens</i> | Urticaceae    |
| 8 | <i>Procris frutescens</i>        | Urticaceae    |
| 8 | <i>Procris pedunculata</i>       | Urticaceae    |
| 8 | <i>Urtica bullata</i>            | Urticaceae    |
| 9 | <i>Begonia areolata</i>          | Begoniaceae   |
| 9 | <i>Begonia bracteata</i>         | Begoniaceae   |
| 9 | <i>Begonia coriacea</i>          | Begoniaceae   |
| 9 | <i>Begonia diadema</i>           | Begoniaceae   |
| 9 | <i>Begonia isoptera</i>          | Begoniaceae   |
| 9 | <i>Begonia lepida</i>            | Begoniaceae   |
| 9 | <i>Begonia longifolia</i>        | Begoniaceae   |
| 9 | <i>Begonia multangula</i>        | Begoniaceae   |
| 9 | <i>Begonia muricata</i>          | Begoniaceae   |
| 9 | <i>Begonia palmata</i>           | Begoniaceae   |
| 9 | <i>Begonia robusta</i>           | Begoniaceae   |
| 9 | <i>Begonia tenuifolia</i>        | Begoniaceae   |
| 9 | <i>Tetrameles nudiflora</i>      | Tetramelaceae |



**Table S6. Taxonomic analysis of anti-infective effects.** Plant families are given which were either in the analysis of all or of only native species above or below the 95 % interval, together with the total numbers of (anti-infective) species per family with the resulting ratio.

| Family           | all species       |                |       |        | native species only |                |       |        |
|------------------|-------------------|----------------|-------|--------|---------------------|----------------|-------|--------|
|                  | number of species | active species | ratio | 95% CI | number of species   | active species | ratio | 95% CI |
| Acanthaceae      | 202               | 21             | 0.10  | below  | 142                 | 11             | 0.08  | below  |
| Acoraceae        | 2                 | 2              | 1     | above  |                     |                |       |        |
| Actinidiaceae    | 18                | 0              | 0     | below  | 18                  | 0              | 0     | below  |
| Adoxaceae        | 11                | 0              | 0     | below  |                     |                |       |        |
| Amaryllidaceae   | 66                | 33             | 0.5   | above  |                     |                |       |        |
| Annonaceae       |                   |                |       |        | 84                  | 23             | 0.27  | above  |
| Apiaceae         | 22                | 18             | 0.82  | above  |                     |                |       |        |
| Apocynaceae      | 203               | 38             | 0.19  | below  | 164                 | 20             | 0.12  | below  |
| Aquifoliaceae    | 8                 | 0              | 0     | below  |                     |                |       |        |
| Araceae          | 96                | 8              | 0.08  | below  | 80                  | 5              | 0.06  | below  |
| Araliaceae       | 50                | 5              | 0.1   | below  | 40                  | 2              | 0.05  | below  |
| Arecaceae        | 123               | 12             | 0.1   | below  | 66                  | 2              | 0.03  | below  |
| Asparagaceae     | 46                | 17             | 0.37  | above  |                     |                |       |        |
| Asphodelaceae    | 21                | 9              | 0.43  | above  |                     |                |       |        |
| Asteraceae       | 295               | 124            | 0.42  | above  |                     |                |       |        |
| Balsaminaceae    | 20                | 1              | 0.05  | below  | 18                  | 0              | 0     | below  |
| Begoniaceae      | 40                | 0              | 0     | below  | 20                  | 0              | 0     | below  |
| Berberidaceae    | 7                 | 5              | 0.71  | above  |                     |                |       |        |
| Brassicaceae     | 31                | 15             | 0.48  | above  |                     |                |       |        |
| Bromeliaceae     | 36                | 2              | 0.06  | below  |                     |                |       |        |
| Burmanniaceae    | 9                 | 0              | 0     | below  |                     |                |       |        |
| Calophyllaceae   | 11                | 6              | 0.55  | above  |                     |                |       |        |
| Caricaceae       | 2                 | 2              | 1     | above  | 1                   | 1              | 1     | above  |
| Ceratophyllaceae | 2                 | 2              | 1     | above  | 2                   | 2              | 1     | above  |
| Chloranthaceae   | 5                 | 3              | 0.6   | above  | 3                   | 2              | 0.67  | above  |
| Clusiaceae       | 16                | 9              | 0.56  | above  | 15                  | 8              | 0.53  | above  |
| Colchicaceae     |                   |                |       |        | 3                   | 2              | 0.67  | above  |
| Commelinaceae    | 39                | 1              | 0.03  | below  | 28                  | 0              | 0     | below  |
| Crypteroniaceae  | 1                 | 1              | 1     | above  | 1                   | 1              | 1     | above  |
| Cupressaceae     | 12                | 11             | 0.92  | above  | 1                   | 1              | 1     | above  |
| Cyperaceae       | 218               | 8              | 0.04  | below  | 188                 | 5              | 0.03  | below  |
| Droseraceae      | 2                 | 2              | 1     | above  | 2                   | 2              | 1     | above  |
| Elaeocarpaceae   | 22                | 2              | 0.09  | below  |                     |                |       |        |
| Ericaceae        | 47                | 4              | 0.09  | below  | 41                  | 1              | 0.02  | below  |
| Fabaceae         | 553               | 201            | 0.36  | above  | 341                 | 90             | 0.26  | above  |
| Fagaceae         | 26                | 2              | 0.08  | below  | 24                  | 0              | 0     | below  |
| Garryaceae       | 1                 | 1              | 1     | above  |                     |                |       |        |

|                  |      |    |      |       |     |    |      |       |
|------------------|------|----|------|-------|-----|----|------|-------|
| Gesneriaceae     | 71   | 3  | 0.04 | below | 59  | 2  | 0.03 | below |
| Hernandiaceae    | 5    | 3  | 0.6  | above | 5   | 3  | 0.6  | above |
| Hydrocharitaceae | 20   | 0  | 0    | below | 17  | 0  | 0    | below |
| Hypericaceae     | 9    | 5  | 0.56 | above | 8   | 5  | 0.63 | above |
| Hypoxidaceae     | 4    | 3  | 0.75 | above | 4   | 3  | 0.75 | above |
| Lamiaceae        | 157  | 63 | 0.4  | above | 99  | 32 | 0.32 | above |
| Lentibulariaceae | 9    | 0  | 0    | below |     |    |      |       |
| Linderniaceae    | 21   | 1  | 0.05 | below | 18  | 0  | 0    | below |
| Loranthaceae     | 32   | 4  | 0.13 | below |     |    |      |       |
| Lythraceae       |      |    |      |       | 20  | 7  | 0.35 | above |
| Magnoliaceae     | 17   | 8  | 0.47 | above |     |    |      |       |
| Marantaceae      | 12   | 0  | 0    | below |     |    |      |       |
| Melastomataceae  | 99   | 3  | 0.03 | below | 91  | 1  | 0.01 | below |
| Meliaceae        | 67   | 29 | 0.43 | above | 61  | 24 | 0.4  | above |
| Menispermaceae   | 42   | 16 | 0.38 | above | 40  | 15 | 0.38 | above |
| Molluginaceae    | 3    | 3  | 1    | above | 3   | 3  | 1    | above |
| Moringaceae      | 2    | 2  | 1    | above |     |    |      |       |
| Muntingiaceae    | 1    | 1  | 1    | above |     |    |      |       |
| Nelumbonaceae    | 1    | 1  | 1    | above |     |    |      |       |
| Onagraceae       | 24   | 2  | 0.08 | below |     |    |      |       |
| Orchidaceae      | 1016 | 39 | 0.04 | below | 745 | 20 | 0.03 | below |
| Orobanchaceae    | 17   | 1  | 0.06 | below |     |    |      |       |
| Papaveraceae     | 11   | 7  | 0.64 | above |     |    |      |       |
| Philydraceae     | 1    | 1  | 1    | above |     |    |      |       |
| Phyllanthaceae   | 94   | 17 | 0.18 | below |     |    |      |       |
| Phytolaccaceae   | 6    | 4  | 0.67 | above | 1   | 1  | 1    | above |
| Poaceae          | 373  | 34 | 0.09 | below | 276 | 9  | 0.03 | below |
| Podocarpaceae    | 6    | 5  | 0.83 | above | 5   | 4  | 0.8  | above |
| Polygalaceae     | 28   | 3  | 0.11 | below |     |    |      |       |
| Polygonaceae     | 44   | 18 | 0.41 | above | 28  | 10 | 0.36 | above |
| Primulaceae      | 85   | 11 | 0.13 | below | 77  | 8  | 0.1  | below |
| Rhizophoraceae   | 11   | 8  | 0.73 | above | 9   | 6  | 0.67 | above |
| Rubiaceae        | 344  | 61 | 0.18 | below | 282 | 38 | 0.14 | below |
| Ruppiaceae       | 1    | 1  | 1    | above | 1   | 1  | 1    | above |
| Rutaceae         | 82   | 45 | 0.55 | above | 69  | 33 | 0.48 | above |
| Saururaceae      | 1    | 1  | 1    | above |     |    |      |       |
| Saxifragaceae    | 2    | 2  | 1    | above | 1   | 1  | 1    | above |
| Simaroubaceae    | 7    | 5  | 0.71 | above | 6   | 4  | 0.67 | above |
| Solanaceae       | 83   | 33 | 0.4  | above |     |    |      |       |
| Tamaricaceae     | 1    | 1  | 1    | above |     |    |      |       |
| Typhaceae        | 2    | 2  | 1    | above | 2   | 2  | 1    | above |
| Urticaceae       | 97   | 5  | 0.05 | below | 92  | 5  | 0.05 | below |
| Violaceae        | 20   | 1  | 0.05 | below | 18  | 0  | 0    | below |
| Vitaceae         | 64   | 4  | 0.06 | below | 60  | 2  | 0.03 | below |

**Table S7. Environmental variables used for the species distribution modelling together with the mean relative contribution to the models and its standard deviation.**

| Source    | Variable                                                                     | Mean  | SD   |
|-----------|------------------------------------------------------------------------------|-------|------|
| WorldClim | Mean Diurnal Range (Mean of monthly (max temp - min temp))                   | 11.47 | 7.28 |
| WorldClim | Isothermality (Mean diurnal range/Temperature annual range)                  | 8.27  | 4.77 |
| WorldClim | Precipitation of Warmest Quarter                                             | 7.40  | 3.98 |
| WorldClim | Precipitation of Coldest Quarter                                             | 7.10  | 3.65 |
| WorldClim | Precipitation of Wettest Quarter                                             | 7.06  | 3.65 |
| SoilGrids | Derived available soil water capacity (volumetric fraction) with FC = pF 2.0 | 7.00  | 3.86 |
| SoilGrids | Depth to bedrock (R horizon) up to 200 cm                                    | 6.91  | 3.98 |
| SoilGrids | Soil pH x 10 in KCl                                                          | 6.90  | 3.80 |
| WorldClim | Precipitation Seasonality (Coefficient of Variation)                         | 6.68  | 3.26 |
| SoilGrids | Cumulative probability of organic soil based on the TAXOUSA and TAXNWRB      | 6.62  | 2.98 |
| SoilGrids | Absolute depth to bedrock (in cm)                                            | 6.59  | 3.16 |
| SoilGrids | Cation exchange capacity of soil in cmolc/kg                                 | 6.41  | 3.14 |
| SoilGrids | Coarse fragments volumetric in %                                             | 5.90  | 2.92 |
| SoilGrids | Soil organic carbon density in kg per cubic-m                                | 5.70  | 3.33 |

**Table S8. Accuracy of the calculated SSDM measured with different evaluation metrics.** (1) The species richness error, i.e. the difference between the predicted and observed species richness; (2) assemblage Cohen's kappa, i.e. the proportion of specific agreement; (3) assemblage specificity, i.e. the proportion of true negatives (species that are both predicted and observed as being absent); (4) assemblage sensitivity, i.e. the proportion of true positives (species that are both predicted and observed as present); and (5) the Jaccard index, a widely used metric of community similarity.

|      | Species richness error | Cohen's kappa | Specificity | Sensitivity | Jaccard |
|------|------------------------|---------------|-------------|-------------|---------|
| Mean | 988.32                 | 1.00          | 0.48        | 0.97        | 0.01    |
| SD   | 306.90                 | 0.00          | 0.16        | 0.14        | 0.02    |

**Table S9. KEGG metabolic pathways included in the selection of secondary metabolites.**

| <b>KEGG Identifier</b> | <b>Metabolism</b>                                   |
|------------------------|-----------------------------------------------------|
| 1200                   | Carbon metabolism                                   |
| 1210                   | 2-Oxocarboxylic acid metabolism                     |
| 1212                   | Fatty acid metabolism                               |
| 1230                   | Biosynthesis of amino acids                         |
| 10                     | Glycolysis / Gluconeogenesis                        |
| 20                     | Citrate cycle (TCA cycle)                           |
| 30                     | Pentose phosphate pathway                           |
| 40                     | Pentose and glucuronate interconversions            |
| 51                     | Fructose and mannose metabolism                     |
| 52                     | Galactose metabolism                                |
| 53                     | Ascorbate and aldarate metabolism                   |
| 500                    | Starch and sucrose metabolism                       |
| 520                    | Amino sugar and nucleotide sugar metabolism         |
| 620                    | Pyruvate metabolism                                 |
| 630                    | Glyoxylate and dicarboxylate metabolism             |
| 640                    | Propanoate metabolism                               |
| 650                    | Butanoate metabolism                                |
| 660                    | C5-Branched dibasic acid metabolism                 |
| 562                    | Inositol phosphate metabolism                       |
| 190                    | Oxidative phosphorylation                           |
| 195                    | Photosynthesis                                      |
| 196                    | Photosynthesis - antenna proteins                   |
| 710                    | Carbon fixation in photosynthetic organisms         |
| 720                    | Carbon fixation pathways in prokaryotes             |
| 680                    | Methane metabolism                                  |
| 910                    | Nitrogen metabolism                                 |
| 920                    | Sulfur metabolism                                   |
| 61                     | Fatty acid biosynthesis                             |
| 62                     | Fatty acid elongation                               |
| 71                     | Fatty acid degradation                              |
| 72                     | Synthesis and degradation of ketone bodies          |
| 73                     | Cutin, suberine and wax biosynthesis                |
| 100                    | Steroid biosynthesis                                |
| 120                    | Primary bile acid biosynthesis                      |
| 121                    | Secondary bile acid biosynthesis                    |
| 140                    | Steroid hormone biosynthesis                        |
| 561                    | Glycerolipid metabolism                             |
| 564                    | Glycerophospholipid metabolism                      |
| 565                    | Ether lipid metabolism                              |
| 600                    | Sphingolipid metabolism                             |
| 590                    | Arachidonic acid metabolism                         |
| 591                    | Linoleic acid metabolism                            |
| 592                    | alpha-Linolenic acid metabolism                     |
| 1040                   | Biosynthesis of unsaturated fatty acids             |
| 230                    | Purine metabolism                                   |
| 240                    | Pyrimidine metabolism                               |
| 250                    | Alanine, aspartate and glutamate metabolism         |
| 260                    | Glycine, serine and threonine metabolism            |
| 270                    | Cysteine and methionine metabolism                  |
| 280                    | Valine, leucine and isoleucine degradation          |
| 290                    | Valine, leucine and isoleucine biosynthesis         |
| 300                    | Lysine biosynthesis                                 |
| 310                    | Lysine degradation                                  |
| 220                    | Arginine biosynthesis                               |
| 330                    | Arginine and proline metabolism                     |
| 340                    | Histidine metabolism                                |
| 350                    | Tyrosine metabolism                                 |
| 360                    | Phenylalanine metabolism                            |
| 380                    | Tryptophan metabolism                               |
| 400                    | Phenylalanine, tyrosine and tryptophan biosynthesis |
| 410                    | beta-Alanine metabolism                             |
| 430                    | Taurine and hypotaurine metabolism                  |
| 440                    | Phosphonate and phosphinate metabolism              |
| 450                    | Selenocompound metabolism                           |
| 460                    | Cyanoamino acid metabolism                          |

|     |                                                                         |      |                                                     |
|-----|-------------------------------------------------------------------------|------|-----------------------------------------------------|
| 471 | D-Glutamine and D-glutamate metabolism                                  | 130  | Ubiquinone and other terpenoid-quinone biosynthesis |
| 472 | D-Arginine and D-ornithine metabolism                                   | 905  | Brassinosteroid biosynthesis                        |
| 473 | D-Alanine metabolism                                                    | 981  | Insect hormone biosynthesis                         |
| 480 | Glutathione metabolism                                                  | 1070 | Biosynthesis of plant hormones                      |
| 510 | N-Glycan biosynthesis                                                   | 3020 | RNA polymerase                                      |
| 513 | Various types of N-glycan biosynthesis                                  | 3022 | Basal transcription factors                         |
| 512 | Mucin type O-glycan biosynthesis                                        | 3040 | Spliceosome                                         |
| 515 | Mannose type O-glycan biosynthesis                                      | 3010 | Ribosome                                            |
| 514 | Other types of O-glycan biosynthesis                                    | 970  | Aminoacyl-tRNA biosynthesis                         |
| 532 | Glycosaminoglycan biosynthesis - chondroitin sulfate / dermatan sulfate | 3013 | RNA transport                                       |
| 534 | Glycosaminoglycan biosynthesis - heparan sulfate / heparin              | 3015 | mRNA surveillance pathway                           |
| 533 | Glycosaminoglycan biosynthesis - keratan sulfate                        | 3008 | Ribosome biogenesis in eukaryotes                   |
| 531 | Glycosaminoglycan degradation                                           | 3060 | Protein export                                      |
| 563 | Glycosylphosphatidylinositol (GPI)-anchor biosynthesis                  | 4141 | Protein processing in endoplasmic reticulum         |
| 601 | Glycosphingolipid biosynthesis - lacto and neolacto series              | 4130 | SNARE interactions in vesicular transport           |
| 603 | Glycosphingolipid biosynthesis - globo and isoglobo series              | 4120 | Ubiquitin mediated proteolysis                      |
| 604 | Glycosphingolipid biosynthesis - ganglio series                         | 4122 | Sulfur relay system                                 |
| 540 | Lipopolysaccharide biosynthesis                                         | 3050 | Proteasome                                          |
| 550 | Peptidoglycan biosynthesis                                              | 3018 | RNA degradation                                     |
| 511 | Other glycan degradation                                                | 3030 | DNA replication                                     |
| 730 | Thiamine metabolism                                                     | 3410 | Base excision repair                                |
| 740 | Riboflavin metabolism                                                   | 3420 | Nucleotide excision repair                          |
| 750 | Vitamin B6 metabolism                                                   | 3430 | Mismatch repair                                     |
| 760 | Nicotinate and nicotinamide metabolism                                  | 3440 | Homologous recombination                            |
| 770 | Pantothenate and CoA biosynthesis                                       | 3450 | Non-homologous end-joining                          |
| 780 | Biotin metabolism                                                       | 3460 | Fanconi anemia pathway                              |
| 785 | Lipoic acid metabolism                                                  | 4144 | Endocytosis                                         |
| 790 | Folate biosynthesis                                                     | 4145 | Phagosome                                           |
| 670 | One carbon pool by folate                                               | 4142 | Lysosome                                            |
| 830 | Retinol metabolism                                                      | 4146 | Peroxisome                                          |
| 860 | Porphyryn and chlorophyll metabolism                                    | 4140 | Autophagy - animal                                  |
|     |                                                                         | 4138 | Autophagy - yeast                                   |
|     |                                                                         | 4136 | Autophagy - other                                   |
|     |                                                                         | 4137 | Mitophagy - animal                                  |
|     |                                                                         | 4139 | Mitophagy - yeast                                   |
|     |                                                                         | 4110 | Cell cycle                                          |
|     |                                                                         | 4111 | Cell cycle - yeast                                  |
|     |                                                                         | 4112 | Cell cycle - Caulobacter                            |

4113 Meiosis - yeast  
4114 Oocyte meiosis  
4210 Apoptosis  
4214 Apoptosis - fly  
4215 Apoptosis - multiple species  
4216 Ferroptosis  
4217 Necroptosis  
4115 p53 signaling pathway  
4218 Cellular senescence  
4640 Hematopoietic cell lineage  
4610 Complement and coagulation  
cascades  
4611 Platelet activation  
4620 Toll-like receptor signaling  
pathway  
4624 Toll and Imd signaling pathway  
4621 NOD-like receptor signaling  
pathway  
4622 RIG-I-like receptor signaling  
pathway  
4623 Cytosolic DNA-sensing  
pathway  
4625 C-type lectin receptor signaling  
pathway  
4650 Natural killer cell mediated  
cytotoxicity  
4612 Antigen processing and  
presentation  
4660 T cell receptor signaling  
pathway  
4658 Th1 and Th2 cell differentiation  
4659 Th17 cell differentiation  
4657 IL-17 signaling pathway  
4662 B cell receptor signaling  
pathway  
4664 Fc epsilon RI signaling pathway  
4666 Fc gamma R-mediated  
phagocytosis  
4670 Leukocyte transendothelial  
migration  
4672 Intestinal immune network for  
IgA production  
4062 Chemokine signaling pathway

**Table S10. Environmental variables used for the species distribution modelling. Variables selected for the full ensemble model are highlighted in bold.**

| <b>Source</b>    | <b>Variable</b>                                                                     |
|------------------|-------------------------------------------------------------------------------------|
| WorldClim        | Annual Mean Temperature                                                             |
| WorldClim        | Mean Temperature of Warmest Quarter                                                 |
| WorldClim        | Mean Temperature of Coldest Quarter                                                 |
| WorldClim        | Annual Precipitation                                                                |
| WorldClim        | Precipitation of Wettest Month                                                      |
| WorldClim        | Precipitation of Driest Month                                                       |
| <b>WorldClim</b> | <b>Precipitation Seasonality (Coefficient of Variation)</b>                         |
| <b>WorldClim</b> | <b>Precipitation of Wettest Quarter</b>                                             |
| WorldClim        | Precipitation of Driest Quarter                                                     |
| <b>WorldClim</b> | <b>Precipitation of Warmest Quarter</b>                                             |
| <b>WorldClim</b> | <b>Precipitation of Coldest Quarter</b>                                             |
| <b>WorldClim</b> | <b>Mean Diurnal Range</b>                                                           |
| <b>WorldClim</b> | <b>Isothermality</b>                                                                |
| WorldClim        | Temperature Seasonality                                                             |
| WorldClim        | Max Temperature of Warmest Month                                                    |
| WorldClim        | Min Temperature of Coldest Month                                                    |
| WorldClim        | Temperature Annual Range                                                            |
| WorldClim        | Mean Temperature of Wettest Quarter                                                 |
| WorldClim        | Mean Temperature of Coldest Water                                                   |
| SoilGrids        | Grade of a sub-soil being acid e.g. having a pH < 5 and low BS                      |
| <b>SoilGrids</b> | <b>Derived available soil water capacity (volumetric fraction) with FC = pF 2.0</b> |
| SoilGrids        | Derived available soil water capacity (volumetric fraction) with FC = pF 2.3        |
| SoilGrids        | Derived available soil water capacity (volumetric fraction) with FC = pF 2.5        |
| SoilGrids        | Derived saturated water content (volumetric fraction) theta-S                       |
| <b>SoilGrids</b> | <b>Depth to bedrock (R horizon) up to 200 cm</b>                                    |
| SoilGrids        | Probability of occurrence (0-100%) of R horizon                                     |
| <b>SoilGrids</b> | <b>Absolute depth to bedrock (in cm)</b>                                            |
| SoilGrids        | Bulk density (fine earth) in kg / cubic-meter                                       |
| <b>SoilGrids</b> | <b>Cation exchange capacity of soil in cmolc/kg</b>                                 |
| SoilGrids        | Clay content (0-2 micro meter) mass fraction in %                                   |
| <b>SoilGrids</b> | <b>Coarse fragments volumetric in %</b>                                             |
| <b>SoilGrids</b> | <b>Cummulative probability of organic soil based on the TAXOUSA and TAXNWRB</b>     |
| <b>SoilGrids</b> | <b>Soil organic carbon density in kg per cubic-m</b>                                |
| SoilGrids        | Soil organic carbon stock in tons per ha for depth interval 0.00 m - 1.00 m         |
| SoilGrids        | Soil organic carbon stock in tons per ha for depth interval 0.00 m - 2.00 m         |
| SoilGrids        | Soil organic carbon stock in tons per ha for depth interval 0.00 m - 0.30 m         |
| SoilGrids        | Soil organic carbon stock in tons per ha                                            |
| SoilGrids        | Soil organic carbon content (fine earth fraction) in g per kg                       |
| SoilGrids        | Soil pH x 10 in H2O                                                                 |
| <b>SoilGrids</b> | <b>Soil pH x 10 in KCl</b>                                                          |
| SoilGrids        | Sodic soil grade based on WRB soil types and soil pH                                |
| SoilGrids        | Silt content (2-50 micro meter) mass fraction in %                                  |
| SoilGrids        | Sand content (50-2000 micro meter) mass fraction in %                               |
| SoilGrids        | Derived available soil water capacity (volumetric fraction) until wilting point     |
